# Supplementary material for: Exploration of the Mechanism and Active Targets of Chinese Herbal Formula, JTTZ, for the Treatment of Type 2 Diabetes with Obesity and Hyperlipidemia Based on Network Pharmacology
Source: Research Square preprint supplement (doi:10.21203/rs.3.rs-147873/v1), 2021-01-20
Supplement: Supplementary file 1 [file d53dafc41fe05d5e0294c31e.xlsx]

## Sheet: 368 Disease related targets
368 Disease related targets
Diseases	Targetname	Gene	Uniprot ID	Source
T2DM Obesity Hyperlipidemia	LIM homeobox transcription factor 1 beta	LMX1B	O60663	DNG
T2DM Obesity Hyperlipidemia	vanin 1	VNN1	O95497	DNG
T2DM Obesity Hyperlipidemia	ATPase copper transporting beta	ATP7B	P35670	DNG
T2DM Obesity Hyperlipidemia	macoilin 1	MACO1	Q8N5G2	DNG
T2DM Obesity Hyperlipidemia	dynein axonemal heavy chain 11	DNAH11	Q96DT5	DNG
T2DM Obesity Hyperlipidemia	nei like DNA glycosylase 1	NEIL1	Q96FI4	DNG
T2DM Obesity Hyperlipidemia	Fungal Cytochrome P450 51	ERG11	P10613	TTD
T2DM Obesity Hyperlipidemia	Thyroid hormone receptor alpha	THRA	P10827	TTD
T2DM Obesity Hyperlipidemia	Thyroid hormone receptor beta	THRB	P10828	TTD
T2DM Obesity Hyperlipidemia	Aldo-keto reductase family 1 member C4	AKR1C4	P17516	DB
T2DM Obesity Hyperlipidemia	Squalene synthetase	FDFT1	P37268	TTD
T2DM Obesity Hyperlipidemia	Aldo-keto reductase family 1 member C3	AKR1C3	P42330	DB
T2DM Obesity Hyperlipidemia	Aldo-keto reductase family 1 member C2	AKR1C2	P52895	DB
T2DM Obesity Hyperlipidemia	Nuclear factor NF-kappa-B p100 subunit	NFKB2	Q00653	DB
T2DM Obesity Hyperlipidemia	Dihydropyrimidine dehydrogenase [NADP+]	DPYD	Q12882	TTD
T2DM Obesity Hyperlipidemia	Prostaglandin D2 receptor	PTGDR	Q13258	TTD
T2DM Obesity Hyperlipidemia	Squalene monooxygenase	SQLE	Q14534	TTD
T2DM Obesity Hyperlipidemia	Solute carrier family 22 member 11	SLC22A11	Q9NSA0	DB
T2DM Obesity Hyperlipidemia	Diacylglycerol O-acyltransferase 2	DGAT2	Q96PD7	TTD DNG
T2DM Obesity Hyperlipidemia	Sodium-dependent dopamine transporter	SLC6A3	Q01959	DB
T2DM Obesity Hyperlipidemia	Organic anion transporter 1	SLC22A8	NPC1L1	TTD
T2DM Obesity Hyperlipidemia	Neuropeptide Y receptor type 1	NPY1R	P25929	TTD
T2DM Obesity Hyperlipidemia	Ciliary neurotrophic factor receptor alpha	CNTFR	P26992	TTD
T2DM Obesity Hyperlipidemia	Tripeptidyl-peptidase II	TPP2	P29144	TTD
T2DM Obesity Hyperlipidemia	Kappa-type opioid receptor	OPRK1	P41145	TTD
T2DM Obesity Hyperlipidemia	5-hydroxytryptamine 6 receptor	HTR6	P50406	TTD
T2DM Obesity Hyperlipidemia	Methionine aminopeptidase 2	METAP2	P50579	TTD
T2DM Obesity Hyperlipidemia	Lyso-PAF: acetyl-CoA acetyltransferase	LPCAT2	Q7L5N7	TTD
T2DM Obesity Hyperlipidemia	Lyso-PAF: acetyl-CoA acetyltransferase	LPCAT1	Q8NF37	TTD
T2DM Obesity Hyperlipidemia	Melanin-concentrating hormone receptor 1	MCHR1	Q99705	TTD
T2DM Obesity Hyperlipidemia	Histamine H3 receptor	HRH3	Q9Y5N1	TTD
T2DM Obesity Hyperlipidemia	potassium calcium-activated channel subfamily U member 1	KCNU1	A8MYU2	DNG
T2DM Obesity Hyperlipidemia	BCL2 like 11	BCL2L11	O43521	DNG
T2DM Obesity Hyperlipidemia	VPS26, retromer complex component A	VPS26A	O75436	DNG
T2DM Obesity Hyperlipidemia	cytochrome c oxidase subunit II	COX2	P00403	DNG
T2DM Obesity Hyperlipidemia	ATP synthase F0 subunit 6	ATP6	P00846	DNG
T2DM Obesity Hyperlipidemia	hemopexin	HPX	P02790	DNG
T2DM Obesity Hyperlipidemia	insulin like growth factor 1	IGF1	P05019	DNG
T2DM Obesity Hyperlipidemia	S100 calcium binding protein A6	S100A6	P06703	DNG
T2DM Obesity Hyperlipidemia	gastric inhibitory polypeptide	GIP	P09681	DNG
T2DM Obesity Hyperlipidemia	matrix metallopeptidase 9	MMP9	P14780	DNG
T2DM Obesity Hyperlipidemia	kinesin family member 5B	KIF5B	P33176	DNG
T2DM Obesity Hyperlipidemia	thrombospondin 2	THBS2	P35442	DNG
T2DM Obesity Hyperlipidemia	inhibitor of DNA binding 1, HLH protein	ID1	P41134	DNG
T2DM Obesity Hyperlipidemia	endothelin converting enzyme 1	ECE1	P42892	DNG
T2DM Obesity Hyperlipidemia	Rac family small GTPase 1	RAC1	P63000	DNG
T2DM Obesity Hyperlipidemia	NK6 homeobox 1	NKX6-1	P78426	DNG
T2DM Obesity Hyperlipidemia	methionine adenosyltransferase 1A	MAT1A	Q00266	DNG
T2DM Obesity Hyperlipidemia	BCL2 like 1	BCL2L1	Q07817	DNG
T2DM Obesity Hyperlipidemia	kinesin family member 1A	KIF1A	Q12756	DNG
T2DM Obesity Hyperlipidemia	caspase 8	CASP8	Q14790	DNG
T2DM Obesity Hyperlipidemia	advanced glycosylation end-product specific receptor	AGER	Q15109	DNG
T2DM Obesity Hyperlipidemia	cysteine dioxygenase type 1	CDO1	Q16878	DNG
T2DM Obesity Hyperlipidemia	transmembrane protein 155	TMEM155	Q4W5P6	DNG
T2DM Obesity Hyperlipidemia	coiled-coil domain containing 92	CCDC92	Q53HC0	DNG
T2DM Obesity Hyperlipidemia	miR-17-92a-1 cluster host gene	MIR17HG	Q75NE6	DNG
T2DM Obesity Hyperlipidemia	zinc finger C3HC-type containing 1	ZC3HC1	Q86WB0	DNG
T2DM Obesity Hyperlipidemia	CDGSH iron sulfur domain 2	CISD2	Q8N5K1	DNG
T2DM Obesity Hyperlipidemia	betaine--homocysteine S-methyltransferase	BHMT	Q93088	DNG
T2DM Obesity Hyperlipidemia	transmembrane protein 18	TMEM18	Q96B42	DNG
T2DM Obesity Hyperlipidemia	SMAD family member 5	SMAD5	Q99717	DNG
T2DM Obesity Hyperlipidemia	cystathionine-beta-synthase	CBS	P0DN79	DNG
T2DM Obesity Hyperlipidemia	epidermal growth factor receptor	EGFR	P00533	DNG
T2DM Obesity Hyperlipidemia	peptidylglycine alpha-amidating monooxygenase	PAM	P19021	DNG
T2DM Obesity Hyperlipidemia	Fas cell surface death receptor	FAS	P25445	DNG
T2DM Obesity Hyperlipidemia	paired box 6	PAX6	P26367	DNG
T2DM Obesity Hyperlipidemia	RELA proto-oncogene, NF-kB subunit	RELA	Q04206	DNG
T2DM Obesity Hyperlipidemia	major histocompatibility complex, class II, DR beta 5	HLA-DRB5	Q30154	DNG
T2DM Obesity Hyperlipidemia	intelectin 1	ITLN1	Q8WWA0	DNG
T2DM Obesity Hyperlipidemia	ATPase sarcoplasmic/endoplasmic reticulum Ca2+ transporting 3	ATP2A3	Q93084	DNG
T2DM Obesity Hyperlipidemia	alpha kinase 1	ALPK1	Q96QP1	DNG
T2DM Obesity Hyperlipidemia	C2 calcium dependent domain containing 4B	C2CD4B	A6NLJ0	DNG
T2DM Obesity Hyperlipidemia	neutrophil cytosolic factor 1	NCF1	P14598	DNG
T2DM Obesity Hyperlipidemia	activating transcription factor 3	ATF3	P18847	DNG
T2DM Obesity Hyperlipidemia	growth factor receptor bound protein 14	GRB14	Q14449	DNG
T2DM Obesity Hyperlipidemia	secreted frizzled related protein 4	SFRP4	Q6FHJ7	DNG
T2DM Obesity Hyperlipidemia	TIMP metallopeptidase inhibitor 1	TIMP1	P01033	DNG
T2DM Obesity Hyperlipidemia	protein kinase C beta	PRKCB	P05771	DNG
T2DM Obesity Hyperlipidemia	hexokinase 1	HK1	P19367	DNG
T2DM Obesity Hyperlipidemia	C2 calcium dependent domain containing 4A	C2CD4A	Q8NCU7	DNG
T2DM Obesity Hyperlipidemia	ZFP57 zinc finger protein	ZFP57	Q9NU63	DNG
T2DM Obesity Hyperlipidemia	adaptor related protein complex 3 subunit sigma 2	AP3S2	P59780	DNG
T2DM Obesity Hyperlipidemia	hemoglobin subunit alpha 1	HBA1	P69905	DNG
T2DM Obesity Hyperlipidemia	ADAM metallopeptidase with thrombospondin type 1 motif 9	ADAMTS9	Q9P2N4	DNG
T2DM Obesity Hyperlipidemia	proprotein convertase subtilisin/kexin type 2	PCSK2	P16519	DNG
T2DM Obesity Hyperlipidemia	TNF receptor superfamily member 1B	TNFRSF1B	P20333	DNG
T2DM Obesity Hyperlipidemia	superoxide DNGmutase 1	SOD1	P00441	DNG
T2DM Obesity Hyperlipidemia	inositol polyphosphate phosphatase like 1	INPPL1	O15357	DNG
T2DM Obesity Hyperlipidemia	8-oxoguanine DNA glycosylase	OGG1	O15527	DNG
T2DM Obesity Hyperlipidemia	NADH dehydrogenase, subunit 1 (complex I)	ND1	P03886	DNG
T2DM Obesity Hyperlipidemia	catalase	CAT	P04040	DNG
T2DM Obesity Hyperlipidemia	sex hormone binding globulin	SHBG	P04278	DNG
T2DM Obesity Hyperlipidemia	glutathione S-transferase mu 1	GSTM1	P09488	DNG
T2DM Obesity Hyperlipidemia	solute carrier family 2 member 1	SLC2A1	P11166	DNG
T2DM Obesity Hyperlipidemia	cytochrome b-245 alpha chain	CYBA	P13498	DNG
T2DM Obesity Hyperlipidemia	insulin degrading enzyme	IDE	P14735	DNG
T2DM Obesity Hyperlipidemia	B-Raf proto-oncogene, serine/threonine kinase	BRAF	P15056	DNG
T2DM Obesity Hyperlipidemia	ST6 beta-galactoside alpha-2,6-sialyltransferase 1	ST6GAL1	P15907	DNG
T2DM Obesity Hyperlipidemia	hematopoietically expressed homeobox	HHEX	Q03014	DNG
T2DM Obesity Hyperlipidemia	c-Maf inducing protein	CMIP	Q8IY22	DNG
T2DM Obesity Hyperlipidemia	family with sequence similarity 234 member A	FAM234A	Q9H0X4	DNG
T2DM Obesity Hyperlipidemia	pleckstrin homology domain containing A1	PLEKHA1	Q9HB21	DNG
T2DM Obesity Hyperlipidemia	jade family PHD finger 2	JADE2	Q9NQC1	DNG
T2DM Obesity Hyperlipidemia	MOK protein kinase	MOK	Q9UQ07	DNG
T2DM Obesity Hyperlipidemia	ring finger protein 6	RNF6	Q9Y252	DNG
T2DM Obesity Hyperlipidemia	proteasome 26S subunit, non-ATPase 6	PSMD6	Q15008	DNG
T2DM Obesity Hyperlipidemia	potassium two pore domain channel subfamily K member 16	KCNK16	Q96T55	DNG
T2DM Obesity Hyperlipidemia	zinc finger AN1-type containing 3	ZFAND3	Q9H8U3	DNG
T2DM Obesity Hyperlipidemia	peptidase D	PEPD	P12955	DNG
T2DM Obesity Hyperlipidemia	cyclin D2	CCND2	P30279	DNG
T2DM Obesity Hyperlipidemia	macrophage erythroblast attacher	MAEA	Q7L5Y9	DNG
T2DM Obesity Hyperlipidemia	notch 2	NOTCH2	Q04721	DNG
T2DM Obesity Hyperlipidemia	prospero homeobox 1	PROX1	Q92786	DNG
T2DM Obesity Hyperlipidemia	ubiquitin conjugating enzyme E2 E2	UBE2E2	Q96LR5	DNG
T2DM Obesity Hyperlipidemia	glycerol-3-phosphate dehydrogenase 2	GPD2	P43304	DNG
T2DM Obesity Hyperlipidemia	THADA, armadillo repeat containing	THADA	Q6YHU6	DNG
T2DM Obesity Hyperlipidemia	high mobility group 20A	HMG20A	Q9NP66	DNG
T2DM Obesity Hyperlipidemia	GLIS family zinc finger 3	GLIS3	Q8NEA6	DNG
T2DM Obesity Hyperlipidemia	wolframin ER transmembrane glycoprotein	WFS1	O76024	DNG
T2DM Obesity Hyperlipidemia	adenylate cyclase 5	ADCY5	O95622	DNG
T2DM Obesity Hyperlipidemia	melatonin receptor 1B	MTNR1B	P49286	DNG
T2DM Obesity Hyperlipidemia	potassium voltage-gated channel subfamily Q member 1	KCNQ1	P51787	DNG
T2DM Obesity Hyperlipidemia	JAZF zinc finger 1	JAZF1	Q86VZ6	DNG
T2DM Obesity Hyperlipidemia	FTO, alpha-ketoglutarate dependent dioxygenase	FTO	Q9C0B1	DNG
T2DM Obesity Hyperlipidemia	insulin like growth factor 2 mRNA binding protein 2	IGF2BP2	Q9Y6M1	DNG
T2DM Obesity Hyperlipidemia	ATPase sarcoplasmic/endoplasmic reticulum Ca2+ transporting 2	ATP2A2	P16615	DNG
T2DM Obesity Hyperlipidemia	endothelin receptor type B	EDNRB	P24530	DNG
T2DM Obesity Hyperlipidemia	synaptosome associated protein 25	SNAP25	P60880	DNG
T2DM Obesity Hyperlipidemia	TNF receptor superfamily member 1A	TNFRSF1A	P19438	DNG
T2DM Obesity Hyperlipidemia	endothelin receptor type A	EDNRA	P25101	DNG
T2DM Obesity Hyperlipidemia	nitric oxide synthase 2	NOS2	P35228	DNG
T2DM Obesity Hyperlipidemia	endothelin 1	EDN1	P05305	DNG
T2DM Obesity Hyperlipidemia	intercellular adhesion molecule 1	ICAM1	P05362	DNG
T2DM Obesity Hyperlipidemia	high mobility group AT-hook 1	HMGA1	P17096	DNG
T2DM Obesity Hyperlipidemia	uncoupling protein 2	UCP2	P55851	DNG
T2DM Obesity Hyperlipidemia	PPARG coactivator 1 alpha	PPARGC1A	Q9UBK2	DNG
T2DM Obesity Hyperlipidemia	insulin receptor substrate 2	IRS2	Q9Y4H2	DNG
T2DM Obesity Hyperlipidemia	BCL2, apoptosis regulator	BCL2	P10415	DNG
T2DM Obesity Hyperlipidemia	mitogen-activated protein kinase 8 interacting protein 1	MAPK8IP1	Q9UQF2	DNG
T2DM Obesity Hyperlipidemia	solute carrier family 2 member 2	SLC2A2	P11168	DNG
T2DM Obesity Hyperlipidemia	HNF1 homeobox B	HNF1B	P35680	DNG
T2DM Obesity Hyperlipidemia	pancreatic and duodenal homeobox 1	PDX1	P52945	DNG
T2DM Obesity Hyperlipidemia	neuronal differentiation 1	NEUROD1	Q13562	DNG
T2DM Obesity Hyperlipidemia	CDK5 regulatory subunit associated protein 1 like 1	CDKAL1	Q5VV42	DNG
T2DM Obesity Hyperlipidemia	calpain 10	CAPN10	Q9HC96	DNG
T2DM Obesity Hyperlipidemia	paired box 4	PAX4	O43316	DNG
T2DM Obesity Hyperlipidemia	hepatocyte nuclear factor 4 alpha	HNF4A	P41235	DNG
T2DM Obesity Hyperlipidemia	protein phosphatase 1 regulatory subunit 3A	PPP1R3A	Q16821	DNG
T2DM Obesity Hyperlipidemia	Fructose-1,6-bisphosphatase	FBP2	O00757	TTD
T2DM Obesity Hyperlipidemia	Canalicular multispecific organic anion transporter 2	ABCC3	O15438	DB
T2DM Obesity Hyperlipidemia	Multidrug resistance-associated protein 4	ABCC4	O15439	DB
T2DM Obesity Hyperlipidemia	Multidrug resistance-associated protein 5	ABCC5	O15440	DB
T2DM Obesity Hyperlipidemia	Free fatty acid receptor 2	FFAR2	O15552	TTD
T2DM Obesity Hyperlipidemia	Long-chain-fatty-acid--CoA ligase 4	ACSL4	O60488	DB
T2DM Obesity Hyperlipidemia	UDP-glucuronosyltransferase 1-9	UGT1A9	O60656	DB
T2DM Obesity Hyperlipidemia	Receptor activity-modifying protein 1	RAMP1	O60894	DB
T2DM Obesity Hyperlipidemia	Receptor activity-modifying protein 2	RAMP2	O60895	DB
T2DM Obesity Hyperlipidemia	Receptor activity-modifying protein 3	RAMP3	O60896	DB
T2DM Obesity Hyperlipidemia	Interferon beta ligand	IFNB1	P01574	TTD
T2DM Obesity Hyperlipidemia	Alpha-1-acid glycoprotein 1	ORM1	P02763	DB
T2DM Obesity Hyperlipidemia	Alpha-amylase 1	AMY1A	P04745	DB
T2DM Obesity Hyperlipidemia	UDP-glucuronosyltransferase 2B4	UGT2B4	P06133	DB
T2DM Obesity Hyperlipidemia	Gastric triacylglycerol lipase	LIPF	P07098	TTD
T2DM Obesity Hyperlipidemia	5-hydroxytryptamine receptor 1A	HTR1A	P08908	DB
T2DM Obesity Hyperlipidemia	Fructose-1,6-bisphosphatase	FBP1	P09467	TTD
T2DM Obesity Hyperlipidemia	Beta platelet-derived growth factor receptor	PDGFRB	P09619	TTD
T2DM Obesity Hyperlipidemia	Cytochrome P450 2C8	CYP2C8	P10632	DB
T2DM Obesity Hyperlipidemia	Glycogen phosphorylase, muscle form	PYGM	P11217	TTD
T2DM Obesity Hyperlipidemia	D(4) dopamine receptor	DRD4	P21917	DB
T2DM Obesity Hyperlipidemia	D(1B) dopamine receptor	DRD5	P21918	DB
T2DM Obesity Hyperlipidemia	UDP-glucuronosyltransferase 1-4	UGT1A4	P22310	DB
T2DM Obesity Hyperlipidemia	Cytochrome P450 3A7	CYP3A7	P24462	DB
T2DM Obesity Hyperlipidemia	Thromboxane-A synthase	TBXAS1	P24557	TTD
T2DM Obesity Hyperlipidemia	Guanylyl cyclase C	GUCY2C	P25092	TTD
T2DM Obesity Hyperlipidemia	Substance-P receptor	TACR1	P25103	TTD
T2DM Obesity Hyperlipidemia	5-hydroxytryptamine receptor 1D	HTR1D	P28221	DB
T2DM Obesity Hyperlipidemia	5-hydroxytryptamine receptor 1B	HTR1B	P28222	DB
T2DM Obesity Hyperlipidemia	Retinoic acid receptor RXR-beta	RXRB	P28702	DB
T2DM Obesity Hyperlipidemia	Calcitonin receptor	CALCR	P30988	DB
T2DM Obesity Hyperlipidemia	5-hydroxytryptamine receptor 7	HTR7	P34969	DB
T2DM Obesity Hyperlipidemia	D(3) dopamine receptor	DRD3	P35462	DB
T2DM Obesity Hyperlipidemia	UDP-glucuronosyltransferase 1-3	UGT1A3	P35503	DB
T2DM Obesity Hyperlipidemia	5-hydroxytryptamine receptor 2B	HTR2B	P41595	DB
T2DM Obesity Hyperlipidemia	Prostaglandin receptor	PTGIR	P43119	TTD
T2DM Obesity Hyperlipidemia	Carnitine acyltransferase	CRAT	P43155	TTD
T2DM Obesity Hyperlipidemia	Solute carrier family 15 member 1	SLC15A1	P46059	DB
T2DM Obesity Hyperlipidemia	AMP-activated protein kinase	PRKAG1	P54619	TTD
T2DM Obesity Hyperlipidemia	Histone deacetylase 1	HDAC1	Q13547	TTD
T2DM Obesity Hyperlipidemia	Neutral alpha-glucosidase AB	GANAB	Q14697	DB
T2DM Obesity Hyperlipidemia	ATP-sensitive inward rectifier potassium channel 8	KCNJ8	Q15842	DB
T2DM Obesity Hyperlipidemia	Electron transfer flavoprotein-ubiquinone oxidoreductase, mitochondrial	ETFDH	Q16134	DB
T2DM Obesity Hyperlipidemia	Solute carrier family 15 member 2	SLC15A2	Q16348	DB
T2DM Obesity Hyperlipidemia	Fusion glycoprotein	F	Q786F3	TTD
T2DM Obesity Hyperlipidemia	Equilibrative nucleoside transporter 4	SLC29A4	Q7RTT9	DB
T2DM Obesity Hyperlipidemia	Multidrug and toxin extrusion protein 2	SLC47A2	Q86VL8	DB
T2DM Obesity Hyperlipidemia	Neutral alpha-glucosidase C	GANC	Q8TET4	DB
T2DM Obesity Hyperlipidemia	Solute carrier family 22 member 2	SLC22A2	O15244	DB DNG
T2DM Obesity Hyperlipidemia	Solute carrier family 22 member 1	SLC22A1	O15245	DB DNG
T2DM Obesity Hyperlipidemia	G-protein coupled receptor-39	GPR39	O43194	TTD DNG
T2DM Obesity Hyperlipidemia	ATP-binding cassette sub-family C member 9	ABCC9	O60706	TTD DB
T2DM Obesity Hyperlipidemia	Solute carrier family 22 member 3	SLC22A3	O75751	DB DNG
T2DM Obesity Hyperlipidemia	insulin	INS	P01308	TTD DNG
T2DM Obesity Hyperlipidemia	Pancreatic alpha-amylase	AMY2A	P04746	DB DNG
T2DM Obesity Hyperlipidemia	Cytochrome P450 1A1	CYP1A1	P04798	DB DNG
T2DM Obesity Hyperlipidemia	Cytochrome P450 1A2	CYP1A2	P05177	DB DNG
T2DM Obesity Hyperlipidemia	Insulin-like growth factor 1 receptor	IGF1R	P08069	DB DNG
T2DM Obesity Hyperlipidemia	Mineralocorticoid receptor	NR3C2	P08235	TTD DNG
T2DM Obesity Hyperlipidemia	Neprilysin	MME	P08473	DB DNG
T2DM Obesity Hyperlipidemia	Beta-1 adrenergic receptor	ADRB1	P08588	TTD DNG
T2DM Obesity Hyperlipidemia	Alpha-2A adrenergic receptor	ADRA2A	P08913	DB DNG
T2DM Obesity Hyperlipidemia	Heat shock protein 70	HSPA1A	P0DMV8	TTD DNG
T2DM Obesity Hyperlipidemia	Lysosomal alpha-glucosidase	GAA	P10253	DB
T2DM Obesity Hyperlipidemia	Cytochrome P450 2D6	CYP2D6	P10635	DB
T2DM Obesity Hyperlipidemia	Islet amyloid polypeptide	IAPP	P10997	TTD
T2DM Obesity Hyperlipidemia	Cytochrome P450 2A6	CYP2A6	P11509	DB
T2DM Obesity Hyperlipidemia	Cystic fibrosis transmembrane conductance regulator	CFTR	P13569	DB
T2DM Obesity Hyperlipidemia	Sodium/glucose cotransporter 1	SLC5A1	P13866	TTD DB DNG
T2DM Obesity Hyperlipidemia	Sucrase-isomaltase, intestinal	SI	P14410	DB
T2DM Obesity Hyperlipidemia	D(2) dopamine receptor	DRD2	P14416	DB
T2DM Obesity Hyperlipidemia	UDP-glucuronosyltransferase 2B7	UGT2B7	P16662	DB DNG
T2DM Obesity Hyperlipidemia	Cytochrome P450 2B6	CYP2B6	P20813	DB
T2DM Obesity Hyperlipidemia	Cytochrome P450 3A5	CYP3A5	P20815	DB
T2DM Obesity Hyperlipidemia	Glycerol-3-phosphate dehydrogenase [NAD(+)], cytoplasmic	GPD1	P21695	DB
T2DM Obesity Hyperlipidemia	D(1A) dopamine receptor	DRD1	P21728	DB
T2DM Obesity Hyperlipidemia	UDP-glucuronosyltransferase 1-1	UGT1A1	P22309	DB DNG
T2DM Obesity Hyperlipidemia	Alpha-1D adrenergic receptor	ADRA1D	P25100	DB
T2DM Obesity Hyperlipidemia	5-hydroxytryptamine receptor 2A	HTR2A	P28223	DB
T2DM Obesity Hyperlipidemia	Sodium/glucose cotransporter 2	SLC5A2	P31639	DB
T2DM Obesity Hyperlipidemia	Multidrug resistance-associated protein 1	ABCC1	P33527	DB
T2DM Obesity Hyperlipidemia	ATP-sensitive inward rectifier potassium channel 1	KCNJ1	P48048	DB DNG
T2DM Obesity Hyperlipidemia	Gastric inhibitory polypeptide receptor	GIPR	P48546	TTD DNG
T2DM Obesity Hyperlipidemia	Phosphoinositide 3 kinase	PIK3CG	P48736	TTD DNG
T2DM Obesity Hyperlipidemia	Glycogen synthase kinase-3 beta	GSK3B	P49841	TTD DNG
T2DM Obesity Hyperlipidemia	Carnitine O-palmitoyltransferase 1, liver isoform	CPT1A	P50416	DB DNG
T2DM Obesity Hyperlipidemia	Interleukin-2	IL2	P60568	TTD DNG
T2DM Obesity Hyperlipidemia	ATP-sensitive inward rectifier potassium channel 10	KCNJ10	P78508	TTD DNG
T2DM Obesity Hyperlipidemia	Corticosteroid 11-beta-dehydrogenase, isozyme 2	HSD11B2	P80365	TTD DNG
T2DM Obesity Hyperlipidemia	ATP-binding cassette sub-family C member 8	ABCC8	Q09428	TTD DB DNG
T2DM Obesity Hyperlipidemia	AMP-activated protein kinase	PRKAA1	Q13131	TTD DNG
T2DM Obesity Hyperlipidemia	Interleukin-18	IL18	Q14116	TTD DNG
T2DM Obesity Hyperlipidemia	Pyruvate dehydrogenase kinase isoform 2 (PDHK2)	PDK2	Q15119	TTD DNG
T2DM Obesity Hyperlipidemia	Membrane copper amine oxidase	AOC3	Q16853	TTD DNG
T2DM Obesity Hyperlipidemia	Solute carrier organic anion transporter family member 4C1	SLCO4C1	Q6ZQN7	DB DNG
T2DM Obesity Hyperlipidemia	Transient receptor potential cation channel subfamily M member 4	TRPM4	Q8TD43	DB DNG
T2DM Obesity Hyperlipidemia	Multidrug and toxin extrusion protein 1	SLC47A1	Q96FL8	DB DNG
T2DM Obesity Hyperlipidemia	Recombinant human angiotensin converting enzyme 2	ACE2	Q9BYF1	TTD DNG
T2DM Obesity Hyperlipidemia	retinol binding protein 4	RBP4	P02753	DNG
T2DM Obesity Hyperlipidemia	serpin family E member 1	SERPINE1	P05121	DNG
T2DM Obesity Hyperlipidemia	interleukin 6	IL6	P05231	DNG
T2DM Obesity Hyperlipidemia	C-C motif chemokine ligand 2	CCL2	P13500	DNG
T2DM Obesity Hyperlipidemia	CD36 molecule	CD36	P16671	DNG
T2DM Obesity Hyperlipidemia	uncoupling protein 3	UCP3	P55916	DNG
T2DM Obesity Hyperlipidemia	complement C3	C3	P01024	DNG
T2DM Obesity Hyperlipidemia	cytochrome b-245 beta chain	CYBB	P04839	DNG
T2DM Obesity Hyperlipidemia	glutathione peroxidase 1	GPX1	P07203	DNG
T2DM Obesity Hyperlipidemia	Kruppel like factor 14	KLF14	Q8TD94	DNG
T2DM Obesity Hyperlipidemia	G protein subunit beta 3	GNB3	P16520	DNG
T2DM Obesity Hyperlipidemia	glucagon	GCG	P01275	DNG
T2DM Obesity Hyperlipidemia	superoxide DNGmutase 2	SOD2	P04179	DNG
T2DM Obesity Hyperlipidemia	ectonucleotide pyrophosphatase/phosphodiesterase 1	ENPP1	P22413	DNG
T2DM Obesity Hyperlipidemia	sterol regulatory element binding transcription factor 1	SREBF1	P36956	DNG
T2DM Obesity Hyperlipidemia	resistin	RETN	Q9HD89	DNG
T2DM Obesity Hyperlipidemia	fibroblast growth factor 21	FGF21	Q9NSA1	TTD DNG
T2DM Obesity Hyperlipidemia	lipase C, hepatic type	LIPC	P11150	DNG
T2DM Obesity Hyperlipidemia	glucokinase regulator	GCKR	Q14397	DNG
T2DM Obesity Hyperlipidemia	solute carrier family 30 member 8	SLC30A8	Q8IWU4	DNG
T2DM Obesity Hyperlipidemia	nitric oxide synthase 3	NOS3	P29474	TTD DNG
T2DM Obesity Hyperlipidemia	klotho	KL	Q9UEF7	DNG
T2DM Obesity Hyperlipidemia	transforming growth factor beta 1	TGFB1	P01137	DNG
T2DM Obesity Hyperlipidemia	haptoglobin	HP	P00738	DNG
T2DM Obesity Hyperlipidemia	heme oxygenase 1	HMOX1	P09601	DNG
T2DM Obesity Hyperlipidemia	leptin	LEP	P41159	DNG
T2DM Obesity Hyperlipidemia	adiponectin, C1Q and collagen domain containing	ADIPOQ	Q15848	DNG
T2DM Obesity Hyperlipidemia	HNF1 homeobox A	HNF1A	P20823	DNG
T2DM Obesity Hyperlipidemia	transcription factor 7 like 2	TCF7L2	Q9NQB0	DNG
T2DM Obesity Hyperlipidemia	AKT serine/threonine kinase 2	AKT2	P31751	DNG
T2DM Obesity Hyperlipidemia	insulin receptor substrate 1	IRS1	P35568	DNG
T2DM Obesity Hyperlipidemia	Renin	REN	P00797	TTD DNG
T2DM Obesity Hyperlipidemia	neuropeptide Y	NPY	P01303	DB DNG
T2DM Obesity Hyperlipidemia	Tumor necrosis factor	TNF	P01375	DB DNG
T2DM Obesity Hyperlipidemia	Interleukin 1 beta	IL1B	P01584	TTD DNG
T2DM Obesity Hyperlipidemia	Apolipoprotein AI	APOA1	P02647	TTD DNG
T2DM Obesity Hyperlipidemia	Apolipoprotein E	APOE	P02649	TTD DNG
T2DM Obesity Hyperlipidemia	Serum albumin	ALB	P02768	DB DNG
T2DM Obesity Hyperlipidemia	Estrogen receptor	ESR1	P03372	TTD DNG
T2DM Obesity Hyperlipidemia	3-hydroxy-3-methylglutaryl-coenzyme A reductase	HMGCR	P04035	TTD DB DNG
T2DM Obesity Hyperlipidemia	mRNA of human apolipoprotein B	APOB	P04114	TTD DNG
T2DM Obesity Hyperlipidemia	mRNA of glucocorticoid receptor	NR3C1	P04150	TTD DNG
T2DM Obesity Hyperlipidemia	Insulin receptor	INSR	P06213	TTD DB DNG
T2DM Obesity Hyperlipidemia	Lipoprotein lipase	LPL	P06858	TTD DB DNG
T2DM Obesity Hyperlipidemia	Multidrug resistance protein 1	ABCB1	P08183	DB DNG
T2DM Obesity Hyperlipidemia	Cytochrome P450 3A4	CYP3A4	P08684	DB DNG
T2DM Obesity Hyperlipidemia	Cholesteryl ester transfer protein	CETP	P11597	TTD DB DNG
T2DM Obesity Hyperlipidemia	Solute carrier family 2, facilitated glucose transporter, member 4	SLC2A4	P14672	TTD DNG
T2DM Obesity Hyperlipidemia	Aldose reductase	AKR1B1	P15121	TTD DNG
T2DM Obesity Hyperlipidemia	Vascular endothelial growth factor A	VEGFA	P15692	DB DNG
T2DM Obesity Hyperlipidemia	Alpha-2B adrenergic receptor	ADRA2B	P18089	DB DNG
T2DM Obesity Hyperlipidemia	Retinoic acid receptor RXR-alpha	RXRA	P19793	DB DNG
T2DM Obesity Hyperlipidemia	Bile-salt-activated lipase	CEL	P19835	TTD DNG
T2DM Obesity Hyperlipidemia	Nuclear factor NF-kappa-B p105 subunit	NFKB1	P19838	DB DNG
T2DM Obesity Hyperlipidemia	Amine oxidase [flavin-containing] A	MAOA	P21397	DB
T2DM Obesity Hyperlipidemia	Liver carboxylesterase	CES1	P23141	TTD DNG
T2DM Obesity Hyperlipidemia	Prostaglandin G/H synthase 1	PTGS1	P23219	TTD DB
T2DM Obesity Hyperlipidemia	Dipeptidyl peptidase 4	DPP4	P27487	TTD DB DNG
T2DM Obesity Hyperlipidemia	Corticosteroid 11-beta-dehydrogenase isozyme 1	HSD11B1	P28845	TTD DB DNG
T2DM Obesity Hyperlipidemia	Adenosine A1 receptor	ADORA1	P30542	TTD DNG
T2DM Obesity Hyperlipidemia	Cytochrome P450 2C18	CYP2C18	P33260	DB DNG
T2DM Obesity Hyperlipidemia	Cyclooxygenase	PTGS2	P35354	TTD DNG
T2DM Obesity Hyperlipidemia	Aryl hydrocarbon receptor	AHR	P35869	DB DNG
T2DM Obesity Hyperlipidemia	Caspase-3	CASP3	P42574	DB DNG
T2DM Obesity Hyperlipidemia	Solute carrier organic anion transporter family member 1A2	SLCO1A2	P46721	DB DNG
T2DM Obesity Hyperlipidemia	Retinoic acid receptor RXR-gamma	RXRG	P48443	TTD DB DNG
T2DM Obesity Hyperlipidemia	Monocarboxylate transporter 1	SLC16A1	P53985	DB DNG
T2DM Obesity Hyperlipidemia	Microsomal triglyceride transfer protein, large subunit	MTTP	P55157	TTD DNG
T2DM Obesity Hyperlipidemia	Peroxisome proliferator-activated receptor delta	PPARD	Q03181	DB
T2DM Obesity Hyperlipidemia	Peroxisome proliferator-activated receptor alpha	PPARA	Q07869	TTD DB DNG
T2DM Obesity Hyperlipidemia	Ileal bile acid transfer	SLC10A2	Q12908	TTD DNG
T2DM Obesity Hyperlipidemia	ATP-sensitive inward rectifier potassium channel 11	KCNJ11	Q14654	DB DNG
T2DM Obesity Hyperlipidemia	Solute carrier family 22 member 6	SLC22A6	Q4U2R8	DB
T2DM Obesity Hyperlipidemia	mRNA of proprotein convertase subtilisin/kexin type 9	PCSK9	Q8NBP7	TTD DNG
T2DM Obesity Hyperlipidemia	Solute carrier family 22 member 8	SLC22A8	Q8TCC7	DB DNG
T2DM Obesity Hyperlipidemia	Nicotinic acid receptor 1	HCAR2	Q8TDS4	TTD DNG
T2DM Obesity Hyperlipidemia	Histone deacetylase 2	HDAC2	Q92769	DB DNG
T2DM Obesity Hyperlipidemia	Canalicular multispecific organic anion transporter 1	ABCC2	Q92887	DB DNG
T2DM Obesity Hyperlipidemia	Bile acid receptor	NR1H4	Q96RI1	TTD DNG
T2DM Obesity Hyperlipidemia	Solute carrier organic anion transporter family member 1B3	SLCO1B3	Q9NPD5	DB DNG
T2DM Obesity Hyperlipidemia	Niemann-Pick C1-like protein 1	NPC1L1	Q9UHC9	TTD DNG
T2DM Obesity Hyperlipidemia	ATP-binding cassette sub-family G member 2	ABCG2	Q9UNQ0	DB DNG
T2DM Obesity Hyperlipidemia	Solute carrier family 22 member 7	SLC22A7	Q9Y694	DB
T2DM Obesity Hyperlipidemia	Solute carrier organic anion transporter family member 1B1	SLCO1B1	Q9Y6L6	DB DNG
T2DM Obesity Hyperlipidemia	muscle RAS oncogene homolog	MRAS	O14807	DNG
T2DM Obesity Hyperlipidemia	Acyl-CoA desaturase	SCD	O00767	TTD DNG
T2DM Obesity Hyperlipidemia	Maltase-glucoamylase, intestinal	MGAM	O43451	TTD DB DNG
T2DM Obesity Hyperlipidemia	Solute carrier organic anion transporter family member 2B1	SLCO2B1	O94956	DB
T2DM Obesity Hyperlipidemia	Bile salt export pump	ABCB11	O95342	DB
T2DM Obesity Hyperlipidemia	ATP-binding cassette, sub-family A, member 1	ABCA1	O95477	TTD DNG
T2DM Obesity Hyperlipidemia	Acetyl-CoA carboxylase 2	ACACB	O00763	TTD DNG
T2DM Obesity Hyperlipidemia	Pancreatic hormone ligand	PYY	P10082	TTD DNG
T2DM Obesity Hyperlipidemia	Growth hormone receptor	GHR	P10912	TTD DNG
T2DM Obesity Hyperlipidemia	Triacylglycerol lipase, pancreatic	PNLIP	P16233	TTD DNG
T2DM Obesity Hyperlipidemia	Alpha-2C adrenergic receptor	ADRA2C	P18825	DB DNG
T2DM Obesity Hyperlipidemia	FGF-4 receptor	FGFR4	P22455	TTD DNG
T2DM Obesity Hyperlipidemia	Cholecystokinin receptor type A	CCKAR	P32238	TTD
T2DM Obesity Hyperlipidemia	Melanocortin-4 receptor	MC4R	P32245	TTD
T2DM Obesity Hyperlipidemia	Bombesin bb3 receptor	BRS3	P32247	TTD
T2DM Obesity Hyperlipidemia	Alpha-1A adrenergic receptor	ADRA1A	P35348	DB DNG
T2DM Obesity Hyperlipidemia	Histamine H1 receptor	HRH1	P35367	TTD DNG
T2DM Obesity Hyperlipidemia	Alpha-1B adrenergic receptor	ADRA1B	P35368	DB DNG
T2DM Obesity Hyperlipidemia	Mu-type opioid receptor	OPRM1	P35372	TTD DNG
T2DM Obesity Hyperlipidemia	Glucagon-like peptide 1 receptor	GLP1R	P43220	TTD DB DNG
T2DM Obesity Hyperlipidemia	Glucagon receptor	GCGR	P47871	TTD DNG
T2DM Obesity Hyperlipidemia	Leptin receptor	LEPR	P48357	TTD DNG
T2DM Obesity Hyperlipidemia	Neuropeptide Y receptor type 2	NPY2R	P49146	TTD DNG
T2DM Obesity Hyperlipidemia	Neuropeptide Y receptor type 4	NPY4R	P50391	TTD
T2DM Obesity Hyperlipidemia	X-linked inhibitor of apoptosis protein	XIAP	P98170	TTD DNG
T2DM Obesity Hyperlipidemia	Carnitine O-palmitoyltransferase I	CPT1B	Q92523	TTD DNG
T2DM Obesity Hyperlipidemia	Growth hormone secretagogue receptor type 1	GHSR	Q92847	TTD DNG
T2DM Obesity Hyperlipidemia	NAD-dependent deacetylase sirtuin-1	SIRT1	Q96EB6	TTD
T2DM Obesity Hyperlipidemia	Beta-2 adrenergic receptor	ADRB2	P07550	TTD DNG
T2DM Obesity Hyperlipidemia	Beta-3 adrenergic receptor	ADRB3	P13945	TTD
T2DM Obesity Hyperlipidemia	Cannabinoid receptor 1	CNR1	P21554	TTD DB DNG
T2DM Obesity Hyperlipidemia	Sodium-dependent noradrenaline transporter	SLC6A2	P23975	TTD DB DNG
T2DM Obesity Hyperlipidemia	Amine oxidase [flavin-containing] B	MAOB	P27338	TTD DB
T2DM Obesity Hyperlipidemia	Sodium-dependent serotonin transporter	SLC6A4	P31645	TTD DB DNG
T2DM Obesity Hyperlipidemia	Peroxisome proliferator-activated receptor gamma	PPARG	P37231	TTD DB DNG
T2DM Obesity Hyperlipidemia	Hormone sensitive lipase	LIPE	Q05469	TTD DNG
T2DM Obesity Hyperlipidemia	Neuropeptide Y receptor 5	NPY5R	Q15761	TTD DNG
T2DM Obesity Hyperlipidemia	Diglyceride acyltransferase	DGAT1	O75907	TTD DNG

## Sheet: 8476 JTTZ related targets
8476 JTTZ related targets
Herbs	MOL	Ingredients	Targetname	Gene	Uniprot ID	Source
Luhui (Aloe vera)	MOL001439	arachidonic acid	ATP-binding cassette sub-family A member 1	ABCA1	O95477	pubchem
Luhui (Aloe vera)	MOL002773	beta-carotene	ATP-binding cassette sub-family A member 1	ABCA1	O95477	pubchem
Danshen (Radix Salviae)	MOL007156	tanshinone Ⅵ	ATP binding cassette subfamily B member 1	ABCB1	P08183	pubchem
Danshen (Radix Salviae)	MOL007154	tanshinone iia	ATP binding cassette subfamily B member 1	ABCB1	P08183	pubchem
Huanglian (Coptidis Rhizoma)	MOL002904	Berlambine	ATP binding cassette subfamily B member 1	ABCB1	P08183	pubchem
Huanglian (Coptidis Rhizoma)	MOL000358	beta-sitosterol	ATP binding cassette subfamily B member 1	ABCB1	P08183	pubchem
Huanglian (Coptidis Rhizoma)	MOL002897	epiberberine	ATP binding cassette subfamily B member 1	ABCB1	P08183	pubchem
Zhimu (Anemarrhenae Rhizoma)	MOL000422	kaempferol	ATP binding cassette subfamily B member 1	ABCB1	P08183	pubchem
Danshen (Radix Salviae)	MOL000006	luteolin	ATP binding cassette subfamily B member 1	ABCB1	P08183	pubchem
Danshen (Radix Salviae)	MOL007122	Miltirone	ATP binding cassette subfamily B member 1	ABCB1	P08183	pubchem
Luhui (Aloe vera)	MOL000098	quercetin	ATP binding cassette subfamily B member 1	ABCB1	P08183	pubchem
Huanglian (Coptidis Rhizoma)	MOL000098	quercetin	ATP binding cassette subfamily B member 1	ABCB1	P08183	pubchem
Hongqu (red yeast rice)	MOL000098	quercetin	ATP binding cassette subfamily B member 1	ABCB1	P08183	pubchem
Luhui (Aloe vera)	MOL000359	sitosterol	ATP binding cassette subfamily B member 1	ABCB1	P08183	pubchem
Zhimu (Anemarrhenae Rhizoma)	MOL000422	kaempferol	ATP-binding cassette, sub-family B (MDR/TAP), member 1A (house mouse)	Abcb1a	P21447	pubchem
Huanglian (Coptidis Rhizoma)	MOL000358	beta-sitosterol	ATP-binding cassette, sub-family C (CFTR/MRP), member 1 (house mouse)	Abcc1	O35379	pubchem
Zhimu (Anemarrhenae Rhizoma)	MOL000422	kaempferol	Multidrug resistance-associated protein 1	ABCC1	P33527	pubchem
Luhui (Aloe vera)	MOL000098	quercetin	Multidrug resistance-associated protein 1	ABCC1	P33527	pubchem
Huanglian (Coptidis Rhizoma)	MOL000098	quercetin	Multidrug resistance-associated protein 1	ABCC1	P33527	pubchem
Hongqu (red yeast rice)	MOL000098	quercetin	Multidrug resistance-associated protein 1	ABCC1	P33527	pubchem
Luhui (Aloe vera)	MOL000098	quercetin	ATP binding cassette subfamily C member 2	ABCC2	Q92887	pubchem
Huanglian (Coptidis Rhizoma)	MOL000098	quercetin	ATP binding cassette subfamily C member 2	ABCC2	Q92887	pubchem
Hongqu (red yeast rice)	MOL000098	quercetin	ATP binding cassette subfamily C member 2	ABCC2	Q92887	pubchem
Luhui (Aloe vera)	MOL001439	arachidonic acid	Multidrug resistance-associated protein 4	ABCC4	O15439	pubchem
Luhui (Aloe vera)	MOL001439	arachidonic acid	ATP-binding cassette sub-family G member 1	ABCG1	P45844	pubchem
Zhimu (Anemarrhenae Rhizoma)	MOL000422	kaempferol	ATP-binding cassette sub-family G member 2	ABCG2	Q9UNQ0	pubchem
Danshen (Radix Salviae)	MOL000006	luteolin	ATP-binding cassette sub-family G member 2	ABCG2	Q9UNQ0	pubchem
Luhui (Aloe vera)	MOL000098	quercetin	ATP-binding cassette sub-family G member 2	ABCG2	Q9UNQ0	pubchem
Huanglian (Coptidis Rhizoma)	MOL000098	quercetin	ATP-binding cassette sub-family G member 2	ABCG2	Q9UNQ0	pubchem
Hongqu (red yeast rice)	MOL000098	quercetin	ATP-binding cassette sub-family G member 2	ABCG2	Q9UNQ0	pubchem
Huanglian (Coptidis Rhizoma)	MOL000358	beta-sitosterol	Acetylcholinesterase (electric eel)	ache	O42275	pubchem
Danshen (Radix Salviae)	MOL001942	isoimperatorin	Acetylcholinesterase	ACHE	P22303	pubchem
Danshen (Radix Salviae)	MOL000006	luteolin	Acetylcholinesterase (electric eel)	ache	O42275	pubchem
Danshen (Radix Salviae)	MOL007077	sclareol	Acetylcholinesterase (electric eel)	ache	O42275	pubchem
Danshen (Radix Salviae)	MOL007156	tanshinone Ⅵ	Acetylcholinesterase (electric eel)	ache	O42275	pubchem
Danshen (Radix Salviae)	MOL007154	tanshinone iia	Acetylcholinesterase (electric eel)	ache	O42275	pubchem
Luhui (Aloe vera)	MOL000471	aloe-emodin	Acetylcholinesterase	ACHE	P22303	pubchem
Huanglian (Coptidis Rhizoma)	MOL001454	berberine	Acetylcholinesterase	ACHE	P22303	pubchem
Danshen (Radix Salviae)	MOL007088	cryptotanshinone	Acetylcholinesterase	ACHE	P22303	pubchem
Danshen (Radix Salviae)	MOL007101	dihydrotanshinoneⅠ	Acetylcholinesterase	ACHE	P22303	pubchem
Zhimu (Anemarrhenae Rhizoma)	MOL000422	kaempferol	Acetylcholinesterase (electric eel)	ache	O42275	pubchem
Zhimu (Anemarrhenae Rhizoma)	MOL000422	kaempferol	Acetylcholinesterase	ACHE	P22303	pubchem
Danshen (Radix Salviae)	MOL000006	luteolin	Acetylcholinesterase	ACHE	P22303	pubchem
Danshen (Radix Salviae)	MOL007122	Miltirone	Acetylcholinesterase	ACHE	P22303	pubchem
Luhui (Aloe vera)	MOL000098	quercetin	Acetylcholinesterase	ACHE	P22303	pubchem
Huanglian (Coptidis Rhizoma)	MOL000098	quercetin	Acetylcholinesterase	ACHE	P22303	pubchem
Hongqu (red yeast rice)	MOL000098	quercetin	Acetylcholinesterase	ACHE	P22303	pubchem
Danshen (Radix Salviae)	MOL007156	tanshinone Ⅵ	Acetylcholinesterase	ACHE	P22303	pubchem
Danshen (Radix Salviae)	MOL007154	tanshinone iia	Acetylcholinesterase	ACHE	P22303	pubchem
Zhimu (Anemarrhenae Rhizoma)	MOL000422	kaempferol	ADAM metallopeptidase domain 10	ADAM10	O14672	pubchem
Zhimu (Anemarrhenae Rhizoma)	MOL000422	kaempferol	ADAM metallopeptidase domain 17	ADAM17	P78536	pubchem
Luhui (Aloe vera)	MOL000098	quercetin	Adenosine A3 receptor	ADORA3	P0DMS8	pubchem
Huanglian (Coptidis Rhizoma)	MOL000098	quercetin	Adenosine A3 receptor	ADORA3	P0DMS8	pubchem
Hongqu (red yeast rice)	MOL000098	quercetin	Adenosine A3 receptor	ADORA3	P0DMS8	pubchem
Luhui (Aloe vera)	MOL002773	beta-carotene	Beta-1 adrenergic receptor	ADRB1	P08588	pubchem
Luhui (Aloe vera)	MOL002773	beta-carotene	adrenoceptor beta 2	ADRB2	P07550	pubchem
Luhui (Aloe vera)	MOL002773	beta-carotene	Beta-3 adrenergic receptor	ADRB3	P13945	pubchem
Luhui (Aloe vera)	MOL002773	beta-carotene	Aryl hydrocarbon receptor	AHR	P35869	pubchem
Danshen (Radix Salviae)	MOL001942	isoimperatorin	Aryl hydrocarbon receptor	AHR	P35869	pubchem
Zhimu (Anemarrhenae Rhizoma)	MOL000422	kaempferol	Aryl hydrocarbon receptor	AHR	P35869	pubchem
Luhui (Aloe vera)	MOL000098	quercetin	Aryl hydrocarbon receptor	AHR	P35869	pubchem
Huanglian (Coptidis Rhizoma)	MOL000098	quercetin	Aryl hydrocarbon receptor	AHR	P35869	pubchem
Hongqu (red yeast rice)	MOL000098	quercetin	Aryl hydrocarbon receptor	AHR	P35869	pubchem
Hongqu (red yeast rice)	MOL007475	Ginsenoside f2	Aldose reductase	AKR1B1	P15121	pubchem
Zhimu (Anemarrhenae Rhizoma)	MOL000422	kaempferol	Aldose reductase	AKR1B1	P15121	pubchem
Danshen (Radix Salviae)	MOL000006	luteolin	Aldose reductase	AKR1B1	P15121	pubchem
Luhui (Aloe vera)	MOL000098	quercetin	Aldose reductase	AKR1B1	P15121	pubchem
Huanglian (Coptidis Rhizoma)	MOL000098	quercetin	Aldose reductase	AKR1B1	P15121	pubchem
Hongqu (red yeast rice)	MOL000098	quercetin	Aldose reductase	AKR1B1	P15121	pubchem
Danshen (Radix Salviae)	MOL007156	tanshinone Ⅵ	aldo-keto reductase family 1 member B	Akr1b1	P07943	pubchem
Danshen (Radix Salviae)	MOL007156	tanshinone Ⅵ	Aldose reductase	AKR1B1	P15121	pubchem
Danshen (Radix Salviae)	MOL007154	tanshinone iia	aldo-keto reductase family 1 member B	Akr1b1	P07943	pubchem
Danshen (Radix Salviae)	MOL007154	tanshinone iia	Aldose reductase	AKR1B1	P15121	pubchem
Danshen (Radix Salviae)	MOL006824	α-amyrin	aldo-keto reductase family 1 member B	Akr1b1	P07943	pubchem
Danshen (Radix Salviae)	MOL000006	luteolin	aldo-keto reductase family 1 member B10	AKR1B10	O60218	pubchem
Luhui (Aloe vera)	MOL000098	quercetin	aldo-keto reductase family 1 member B10	AKR1B10	O60218	pubchem
Huanglian (Coptidis Rhizoma)	MOL000098	quercetin	aldo-keto reductase family 1 member B10	AKR1B10	O60218	pubchem
Hongqu (red yeast rice)	MOL000098	quercetin	aldo-keto reductase family 1 member B10	AKR1B10	O60218	pubchem
Luhui (Aloe vera)	MOL002773	beta-carotene	Serine/threonine-protein kinase AKT	AKT1	P31749	pubchem
Hongqu (red yeast rice)	MOL007475	Ginsenoside f2	Serine/threonine-protein kinase AKT	AKT1	P31749	pubchem
Luhui (Aloe vera)	MOL000098	quercetin	Serine/threonine-protein kinase AKT	AKT1	P31749	pubchem
Huanglian (Coptidis Rhizoma)	MOL000098	quercetin	Serine/threonine-protein kinase AKT	AKT1	P31749	pubchem
Hongqu (red yeast rice)	MOL000098	quercetin	Serine/threonine-protein kinase AKT	AKT1	P31749	pubchem
Luhui (Aloe vera)	MOL002773	beta-carotene	Serum albumin	ALB	P02768	pubchem
Danshen (Radix Salviae)	MOL001942	isoimperatorin	aldehyde dehydrogenase 1 family member A1	ALDH1A1	P00352	pubchem
Luhui (Aloe vera)	MOL001439	arachidonic acid	aldehyde dehydrogenase 1 family member A1	ALDH1A1	P00352	pubchem
Huanglian (Coptidis Rhizoma)	MOL001454	berberine	aldehyde dehydrogenase 1 family member A1	ALDH1A1	P00352	pubchem
Luhui (Aloe vera)	MOL002773	beta-carotene	aldehyde dehydrogenase 1 family member A1	ALDH1A1	P00352	pubchem
Danshen (Radix Salviae)	MOL007088	cryptotanshinone	aldehyde dehydrogenase 1 family member A1	ALDH1A1	P00352	pubchem
Huanglian (Coptidis Rhizoma)	MOL002897	epiberberine	aldehyde dehydrogenase 1 family member A1	ALDH1A1	P00352	pubchem
Zhimu (Anemarrhenae Rhizoma)	MOL000422	kaempferol	aldehyde dehydrogenase 1 family member A1	ALDH1A1	P00352	pubchem
Danshen (Radix Salviae)	MOL000006	luteolin	aldehyde dehydrogenase 1 family member A1	ALDH1A1	P00352	pubchem
Luhui (Aloe vera)	MOL000098	quercetin	aldehyde dehydrogenase 1 family member A1	ALDH1A1	P00352	pubchem
Huanglian (Coptidis Rhizoma)	MOL000098	quercetin	aldehyde dehydrogenase 1 family member A1	ALDH1A1	P00352	pubchem
Hongqu (red yeast rice)	MOL000098	quercetin	aldehyde dehydrogenase 1 family member A1	ALDH1A1	P00352	pubchem
Danshen (Radix Salviae)	MOL007156	tanshinone Ⅵ	aldehyde dehydrogenase 1 family member A1	ALDH1A1	P00352	pubchem
Danshen (Radix Salviae)	MOL007154	tanshinone iia	aldehyde dehydrogenase 1 family member A1	ALDH1A1	P00352	pubchem
Luhui (Aloe vera)	MOL001439	arachidonic acid	Aldehyde dehydrogenase	ALDH2	P05091	pubchem
Luhui (Aloe vera)	MOL001439	arachidonic acid	Aldehyde dehydrogenase, dimeric NADP-preferring	ALDH3A1	P30838	pubchem
Luhui (Aloe vera)	MOL000098	quercetin	ALK receptor tyrosine kinase	ALK	Q9UM73	pubchem
Huanglian (Coptidis Rhizoma)	MOL000098	quercetin	ALK receptor tyrosine kinase	ALK	Q9UM73	pubchem
Hongqu (red yeast rice)	MOL000098	quercetin	ALK receptor tyrosine kinase	ALK	Q9UM73	pubchem
Danshen (Radix Salviae)	MOL000006	luteolin	Arachidonate 12-lipoxygenase	ALOX12	P18054	pubchem
Luhui (Aloe vera)	MOL000098	quercetin	Arachidonate 12-lipoxygenase	ALOX12	P18054	pubchem
Huanglian (Coptidis Rhizoma)	MOL000098	quercetin	Arachidonate 12-lipoxygenase	ALOX12	P18054	pubchem
Hongqu (red yeast rice)	MOL000098	quercetin	Arachidonate 12-lipoxygenase	ALOX12	P18054	pubchem
Danshen (Radix Salviae)	MOL007156	tanshinone Ⅵ	Arachidonate 12-lipoxygenase	ALOX12	P18054	pubchem
Danshen (Radix Salviae)	MOL007154	tanshinone iia	Arachidonate 12-lipoxygenase	ALOX12	P18054	pubchem
Luhui (Aloe vera)	MOL001439	arachidonic acid	Arachidonate 15-lipoxygenase	ALOX15	P16050	pubchem
Zhimu (Anemarrhenae Rhizoma)	MOL000422	kaempferol	Arachidonate 15-lipoxygenase	ALOX15	P16050	pubchem
Danshen (Radix Salviae)	MOL000006	luteolin	Arachidonate 15-lipoxygenase	ALOX15	P16050	pubchem
Luhui (Aloe vera)	MOL000098	quercetin	Arachidonate 15-lipoxygenase	ALOX15	P16050	pubchem
Huanglian (Coptidis Rhizoma)	MOL000098	quercetin	Arachidonate 15-lipoxygenase	ALOX15	P16050	pubchem
Hongqu (red yeast rice)	MOL000098	quercetin	Arachidonate 15-lipoxygenase	ALOX15	P16050	pubchem
Zhimu (Anemarrhenae Rhizoma)	MOL000422	kaempferol	arachidonate 15-lipoxygenase type B	ALOX15B	O15296	pubchem
Danshen (Radix Salviae)	MOL000006	luteolin	arachidonate 15-lipoxygenase type B	ALOX15B	O15296	pubchem
Luhui (Aloe vera)	MOL000098	quercetin	arachidonate 15-lipoxygenase type B	ALOX15B	O15296	pubchem
Huanglian (Coptidis Rhizoma)	MOL000098	quercetin	arachidonate 15-lipoxygenase type B	ALOX15B	O15296	pubchem
Hongqu (red yeast rice)	MOL000098	quercetin	arachidonate 15-lipoxygenase type B	ALOX15B	O15296	pubchem
Zhimu (Anemarrhenae Rhizoma)	MOL000422	kaempferol	Arachidonate 5-lipoxygenase	ALOX5	P09917	pubchem
Danshen (Radix Salviae)	MOL000006	luteolin	Arachidonate 5-lipoxygenase	ALOX5	P09917	pubchem
Luhui (Aloe vera)	MOL000098	quercetin	Arachidonate 5-lipoxygenase	ALOX5	P09917	pubchem
Huanglian (Coptidis Rhizoma)	MOL000098	quercetin	Arachidonate 5-lipoxygenase	ALOX5	P09917	pubchem
Hongqu (red yeast rice)	MOL000098	quercetin	Arachidonate 5-lipoxygenase	ALOX5	P09917	pubchem
Zhimu (Anemarrhenae Rhizoma)	MOL000422	kaempferol	glucosidase MAL62 (baker's yeast)	Alpha	P07265	pubchem
Danshen (Radix Salviae)	MOL000006	luteolin	glucosidase MAL62 (baker's yeast)	Alpha	P07265	pubchem
Danshen (Radix Salviae)	MOL000006	luteolin	alkaline phosphatase, intestinal	ALPI	P09923	pubchem
Luhui (Aloe vera)	MOL002773	beta-carotene	Alkaline phosphatase, tissue-nonspecific isozyme	ALPL	P05186	pubchem
Zhimu (Anemarrhenae Rhizoma)	MOL000422	kaempferol	amylase alpha 1A (salivary)	AMY1A	P04745	pubchem
Danshen (Radix Salviae)	MOL000006	luteolin	amylase alpha 1A (salivary)	AMY1A	P04745	pubchem
Luhui (Aloe vera)	MOL000098	quercetin	amylase alpha 1A (salivary)	AMY1A	P04745	pubchem
Huanglian (Coptidis Rhizoma)	MOL000098	quercetin	amylase alpha 1A (salivary)	AMY1A	P04745	pubchem
Hongqu (red yeast rice)	MOL000098	quercetin	amylase alpha 1A (salivary)	AMY1A	P04745	pubchem
Zhimu (Anemarrhenae Rhizoma)	MOL000422	kaempferol	amylase alpha 1B (salivary)	AMY1B	P04745	pubchem
Danshen (Radix Salviae)	MOL000006	luteolin	amylase alpha 1B (salivary)	AMY1B	P04745	pubchem
Luhui (Aloe vera)	MOL000098	quercetin	amylase alpha 1B (salivary)	AMY1B	P04745	pubchem
Huanglian (Coptidis Rhizoma)	MOL000098	quercetin	amylase alpha 1B (salivary)	AMY1B	P04745	pubchem
Hongqu (red yeast rice)	MOL000098	quercetin	amylase alpha 1B (salivary)	AMY1B	P04745	pubchem
Zhimu (Anemarrhenae Rhizoma)	MOL000422	kaempferol	amylase alpha 1C (salivary)	AMY1C	P04745	pubchem
Danshen (Radix Salviae)	MOL000006	luteolin	amylase alpha 1C (salivary)	AMY1C	P04745	pubchem
Luhui (Aloe vera)	MOL000098	quercetin	amylase alpha 1C (salivary)	AMY1C	P04745	pubchem
Huanglian (Coptidis Rhizoma)	MOL000098	quercetin	amylase alpha 1C (salivary)	AMY1C	P04745	pubchem
Hongqu (red yeast rice)	MOL000098	quercetin	amylase alpha 1C (salivary)	AMY1C	P04745	pubchem
Huanglian (Coptidis Rhizoma)	MOL002897	epiberberine	apoptotic peptidase activating factor 1	APAF1	O14727	pubchem
Danshen (Radix Salviae)	MOL007156	tanshinone Ⅵ	apoptotic peptidase activating factor 1	APAF1	O14727	pubchem
Danshen (Radix Salviae)	MOL007154	tanshinone iia	apoptotic peptidase activating factor 1	APAF1	O14727	pubchem
Huanglian (Coptidis Rhizoma)	MOL002897	epiberberine	apolipoprotein B mRNA editing enzyme catalytic subunit 3F	APOBEC3F	Q8IUX4	pubchem
Huanglian (Coptidis Rhizoma)	MOL002897	epiberberine	apolipoprotein B mRNA editing enzyme catalytic subunit 3G	APOBEC3G	Q9HC16	pubchem
Danshen (Radix Salviae)	MOL007156	tanshinone Ⅵ	apolipoprotein B mRNA editing enzyme catalytic subunit 3G	APOBEC3G	Q9HC16	pubchem
Danshen (Radix Salviae)	MOL007154	tanshinone iia	apolipoprotein B mRNA editing enzyme catalytic subunit 3G	APOBEC3G	Q9HC16	pubchem
Zhimu (Anemarrhenae Rhizoma)	MOL000422	kaempferol	amyloid beta precursor protein	APP	P05067	pubchem
Danshen (Radix Salviae)	MOL000006	luteolin	amyloid beta precursor protein	APP	P05067	pubchem
Luhui (Aloe vera)	MOL000098	quercetin	amyloid beta precursor protein	APP	P05067	pubchem
Huanglian (Coptidis Rhizoma)	MOL000098	quercetin	amyloid beta precursor protein	APP	P05067	pubchem
Hongqu (red yeast rice)	MOL000098	quercetin	amyloid beta precursor protein	APP	P05067	pubchem
Danshen (Radix Salviae)	MOL007077	sclareol	Androgen Receptor	AR	P10275	pubchem
Luhui (Aloe vera)	MOL000471	aloe-emodin	Androgen Receptor	AR	P10275	pubchem
Zhimu (Anemarrhenae Rhizoma)	MOL000422	kaempferol	Androgen Receptor	AR	P10275	pubchem
Danshen (Radix Salviae)	MOL000006	luteolin	Androgen Receptor	AR	P10275	pubchem
Kugua (Momordica charantia)	MOL010267	lycopene	Androgen Receptor	AR	P10275	pubchem
Luhui (Aloe vera)	MOL000098	quercetin	Androgen Receptor	AR	P10275	pubchem
Huanglian (Coptidis Rhizoma)	MOL000098	quercetin	Androgen Receptor	AR	P10275	pubchem
Hongqu (red yeast rice)	MOL000098	quercetin	Androgen Receptor	AR	P10275	pubchem
Danshen (Radix Salviae)	MOL007077	sclareol	Androgen Receptor	AR	P10275	pubchem
Danshen (Radix Salviae)	MOL007156	tanshinone Ⅵ	Androgen Receptor	AR	P10275	pubchem
Danshen (Radix Salviae)	MOL007154	tanshinone iia	Androgen Receptor	AR	P10275	pubchem
Luhui (Aloe vera)	MOL000098	quercetin	arylsulfatase A	ARSA	P15289	pubchem
Huanglian (Coptidis Rhizoma)	MOL000098	quercetin	arylsulfatase A	ARSA	P15289	pubchem
Hongqu (red yeast rice)	MOL000098	quercetin	arylsulfatase A	ARSA	P15289	pubchem
Danshen (Radix Salviae)	MOL007156	tanshinone Ⅵ	ATPase family AAA domain containing 5	ATAD5	Q96QE3	pubchem
Danshen (Radix Salviae)	MOL007154	tanshinone iia	ATPase family AAA domain containing 5	ATAD5	Q96QE3	pubchem
Huanglian (Coptidis Rhizoma)	MOL002894	berberrubine	ATPase family AAA domain containing 5	ATAD5	Q96QE3	pubchem
Luhui (Aloe vera)	MOL000098	quercetin	ATPase family AAA domain containing 5	ATAD5	Q96QE3	pubchem
Huanglian (Coptidis Rhizoma)	MOL000098	quercetin	ATPase family AAA domain containing 5	ATAD5	Q96QE3	pubchem
Hongqu (red yeast rice)	MOL000098	quercetin	ATPase family AAA domain containing 5	ATAD5	Q96QE3	pubchem
Zhimu (Anemarrhenae Rhizoma)	MOL000422	kaempferol	activating transcription factor 6	ATF6	P18850	pubchem
Luhui (Aloe vera)	MOL000098	quercetin	activating transcription factor 6	ATF6	P18850	pubchem
Huanglian (Coptidis Rhizoma)	MOL000098	quercetin	activating transcription factor 6	ATF6	P18850	pubchem
Hongqu (red yeast rice)	MOL000098	quercetin	activating transcription factor 6	ATF6	P18850	pubchem
Huanglian (Coptidis Rhizoma)	MOL002903	(R)-Canadine	ataxin 2	ATXN2	Q99700	pubchem
Danshen (Radix Salviae)	MOL000006	luteolin	ataxin 2	ATXN2	Q99700	pubchem
Luhui (Aloe vera)	MOL000098	quercetin	aurora kinase B	AURKB	Q96GD4	pubchem
Huanglian (Coptidis Rhizoma)	MOL000098	quercetin	aurora kinase B	AURKB	Q96GD4	pubchem
Hongqu (red yeast rice)	MOL000098	quercetin	aurora kinase B	AURKB	Q96GD4	pubchem
Luhui (Aloe vera)	MOL000098	quercetin	Vasopressin V2 receptor	AVPR2	P30518	pubchem
Huanglian (Coptidis Rhizoma)	MOL000098	quercetin	Vasopressin V2 receptor	AVPR2	P30518	pubchem
Hongqu (red yeast rice)	MOL000098	quercetin	Vasopressin V2 receptor	AVPR2	P30518	pubchem
Luhui (Aloe vera)	MOL000098	quercetin	Tyrosine-protein kinase receptor UFO	AXL	P30530	pubchem
Huanglian (Coptidis Rhizoma)	MOL000098	quercetin	Tyrosine-protein kinase receptor UFO	AXL	P30530	pubchem
Hongqu (red yeast rice)	MOL000098	quercetin	Tyrosine-protein kinase receptor UFO	AXL	P30530	pubchem
Danshen (Radix Salviae)	MOL001942	isoimperatorin	Beta-secretase 1	BACE1	P56817	pubchem
Zhimu (Anemarrhenae Rhizoma)	MOL000422	kaempferol	Beta-secretase 1	BACE1	P56817	pubchem
Luhui (Aloe vera)	MOL000098	quercetin	Beta-secretase 1	BACE1	P56817	pubchem
Huanglian (Coptidis Rhizoma)	MOL000098	quercetin	Beta-secretase 1	BACE1	P56817	pubchem
Hongqu (red yeast rice)	MOL000098	quercetin	Beta-secretase 1	BACE1	P56817	pubchem
Luhui (Aloe vera)	MOL000471	aloe-emodin	Apoptosis regulator BAX	BAX	Q07812	pubchem
Luhui (Aloe vera)	MOL002773	beta-carotene	Apoptosis regulator BAX	BAX	Q07812	pubchem
Luhui (Aloe vera)	MOL000359	sitosterol	Apoptosis regulator BAX	BAX	Q07812	pubchem
Danshen (Radix Salviae)	MOL007156	tanshinone Ⅵ	bromodomain adjacent to zinc finger domain 2B	BAZ2B	Q9UIF8	pubchem
Danshen (Radix Salviae)	MOL007154	tanshinone iia	bromodomain adjacent to zinc finger domain 2B	BAZ2B	Q9UIF8	pubchem
Danshen (Radix Salviae)	MOL007088	cryptotanshinone	bromodomain adjacent to zinc finger domain 2B	BAZ2B	Q9UIF8	pubchem
Danshen (Radix Salviae)	MOL000006	luteolin	bromodomain adjacent to zinc finger domain 2B	BAZ2B	Q9UIF8	pubchem
Huanglian (Coptidis Rhizoma)	MOL001454	berberine	Butyrylcholinesterase	BCHE	P06276	pubchem
Zhimu (Anemarrhenae Rhizoma)	MOL000422	kaempferol	Butyrylcholinesterase	BCHE	P06276	pubchem
Danshen (Radix Salviae)	MOL000006	luteolin	Butyrylcholinesterase	BCHE	P06276	pubchem
Luhui (Aloe vera)	MOL000098	quercetin	Butyrylcholinesterase	BCHE	P06276	pubchem
Huanglian (Coptidis Rhizoma)	MOL000098	quercetin	Butyrylcholinesterase	BCHE	P06276	pubchem
Hongqu (red yeast rice)	MOL000098	quercetin	Butyrylcholinesterase	BCHE	P06276	pubchem
Luhui (Aloe vera)	MOL002773	beta-carotene	Apoptosis regulator Bcl-2	BCL2	P10415	pubchem
Luhui (Aloe vera)	MOL000359	sitosterol	Apoptosis regulator Bcl-2	BCL2	P10415	pubchem
Danshen (Radix Salviae)	MOL000006	luteolin	Apoptosis regulator Bcl-2	BCL2	P10415	pubchem
Luhui (Aloe vera)	MOL000471	aloe-emodin	BCL2 like 1	BCL2L1	Q07817	pubchem
Huanglian (Coptidis Rhizoma)	MOL002897	epiberberine	BCL2 like 1	BCL2L1	Q07817	pubchem
Danshen (Radix Salviae)	MOL000006	luteolin	BCL2 like 1	BCL2L1	Q07817	pubchem
Luhui (Aloe vera)	MOL002773	beta-carotene	Beta,beta-carotene 15,15'-monooxygenase	BCO1	Q9HAY6	pubchem
Danshen (Radix Salviae)	MOL000006	luteolin	BLM RecQ like helicase	BLM	P54132	pubchem
Luhui (Aloe vera)	MOL000098	quercetin	BLM RecQ like helicase	BLM	P54132	pubchem
Huanglian (Coptidis Rhizoma)	MOL000098	quercetin	BLM RecQ like helicase	BLM	P54132	pubchem
Hongqu (red yeast rice)	MOL000098	quercetin	BLM RecQ like helicase	BLM	P54132	pubchem
Danshen (Radix Salviae)	MOL000006	luteolin	BRCA1 DNA repair associated	BRCA1	P38398	pubchem
Luhui (Aloe vera)	MOL001439	arachidonic acid	Complement C1r subcomponent	C1R	P00736	pubchem
Zhimu (Anemarrhenae Rhizoma)	MOL000422	kaempferol	carbonic anhydrase 1	CA1	P00915	pubchem
Danshen (Radix Salviae)	MOL000006	luteolin	carbonic anhydrase 1	CA1	P00915	pubchem
Luhui (Aloe vera)	MOL000098	quercetin	carbonic anhydrase 1	CA1	P00915	pubchem
Huanglian (Coptidis Rhizoma)	MOL000098	quercetin	carbonic anhydrase 1	CA1	P00915	pubchem
Hongqu (red yeast rice)	MOL000098	quercetin	carbonic anhydrase 1	CA1	P00915	pubchem
Zhimu (Anemarrhenae Rhizoma)	MOL000422	kaempferol	carbonic anhydrase 12	CA12	O43570	pubchem
Danshen (Radix Salviae)	MOL000006	luteolin	carbonic anhydrase 12	CA12	O43570	pubchem
Luhui (Aloe vera)	MOL000098	quercetin	carbonic anhydrase 12	CA12	O43570	pubchem
Huanglian (Coptidis Rhizoma)	MOL000098	quercetin	carbonic anhydrase 12	CA12	O43570	pubchem
Hongqu (red yeast rice)	MOL000098	quercetin	carbonic anhydrase 12	CA12	O43570	pubchem
Luhui (Aloe vera)	MOL000098	quercetin	carbonic anhydrase 14	CA14	Q9ULX7	pubchem
Huanglian (Coptidis Rhizoma)	MOL000098	quercetin	carbonic anhydrase 14	CA14	Q9ULX7	pubchem
Hongqu (red yeast rice)	MOL000098	quercetin	carbonic anhydrase 14	CA14	Q9ULX7	pubchem
Zhimu (Anemarrhenae Rhizoma)	MOL000422	kaempferol	carbonic anhydrase 2	CA2	P00918	pubchem
Danshen (Radix Salviae)	MOL000006	luteolin	carbonic anhydrase 2	CA2	P00918	pubchem
Luhui (Aloe vera)	MOL000098	quercetin	carbonic anhydrase 2	CA2	P00918	pubchem
Huanglian (Coptidis Rhizoma)	MOL000098	quercetin	carbonic anhydrase 2	CA2	P00918	pubchem
Hongqu (red yeast rice)	MOL000098	quercetin	carbonic anhydrase 2	CA2	P00918	pubchem
Luhui (Aloe vera)	MOL000098	quercetin	carbonic anhydrase 3	CA3	P07451	pubchem
Huanglian (Coptidis Rhizoma)	MOL000098	quercetin	carbonic anhydrase 3	CA3	P07451	pubchem
Hongqu (red yeast rice)	MOL000098	quercetin	carbonic anhydrase 3	CA3	P07451	pubchem
Zhimu (Anemarrhenae Rhizoma)	MOL000422	kaempferol	Carbonic anhydrase IV	CA4	P22748	pubchem
Danshen (Radix Salviae)	MOL000006	luteolin	Carbonic anhydrase IV	CA4	P22748	pubchem
Luhui (Aloe vera)	MOL000098	quercetin	Carbonic anhydrase IV	CA4	P22748	pubchem
Huanglian (Coptidis Rhizoma)	MOL000098	quercetin	Carbonic anhydrase IV	CA4	P22748	pubchem
Hongqu (red yeast rice)	MOL000098	quercetin	Carbonic anhydrase IV	CA4	P22748	pubchem
Luhui (Aloe vera)	MOL000098	quercetin	Carbonic anhydrase VA	CA5A	P35218	pubchem
Huanglian (Coptidis Rhizoma)	MOL000098	quercetin	Carbonic anhydrase VA	CA5A	P35218	pubchem
Hongqu (red yeast rice)	MOL000098	quercetin	Carbonic anhydrase VA	CA5A	P35218	pubchem
Luhui (Aloe vera)	MOL000098	quercetin	carbonic anhydrase 5B	CA5B	Q9Y2D0	pubchem
Huanglian (Coptidis Rhizoma)	MOL000098	quercetin	carbonic anhydrase 5B	CA5B	Q9Y2D0	pubchem
Hongqu (red yeast rice)	MOL000098	quercetin	carbonic anhydrase 5B	CA5B	Q9Y2D0	pubchem
Luhui (Aloe vera)	MOL000098	quercetin	Carbonic anhydrase VI	CA6	P23280	pubchem
Huanglian (Coptidis Rhizoma)	MOL000098	quercetin	Carbonic anhydrase VI	CA6	P23280	pubchem
Hongqu (red yeast rice)	MOL000098	quercetin	Carbonic anhydrase VI	CA6	P23280	pubchem
Zhimu (Anemarrhenae Rhizoma)	MOL000422	kaempferol	Carbonic anhydrase VII	CA7	P43166	pubchem
Danshen (Radix Salviae)	MOL000006	luteolin	Carbonic anhydrase VII	CA7	P43166	pubchem
Luhui (Aloe vera)	MOL000098	quercetin	Carbonic anhydrase VII	CA7	P43166	pubchem
Huanglian (Coptidis Rhizoma)	MOL000098	quercetin	Carbonic anhydrase VII	CA7	P43166	pubchem
Hongqu (red yeast rice)	MOL000098	quercetin	Carbonic anhydrase VII	CA7	P43166	pubchem
Luhui (Aloe vera)	MOL000098	quercetin	carbonic anhydrase 9	CA9	Q16790	pubchem
Huanglian (Coptidis Rhizoma)	MOL000098	quercetin	carbonic anhydrase 9	CA9	Q16790	pubchem
Hongqu (red yeast rice)	MOL000098	quercetin	carbonic anhydrase 9	CA9	Q16790	pubchem
Luhui (Aloe vera)	MOL000098	quercetin	calmodulin 1	CALM1	P0DP23	pubchem
Huanglian (Coptidis Rhizoma)	MOL000098	quercetin	calmodulin 1	CALM1	P0DP23	pubchem
Hongqu (red yeast rice)	MOL000098	quercetin	calmodulin 1	CALM1	P0DP23	pubchem
Luhui (Aloe vera)	MOL000098	quercetin	calcium/calmodulin dependent protein kinase ID	CAMK1D	Q8IU85	pubchem
Huanglian (Coptidis Rhizoma)	MOL000098	quercetin	calcium/calmodulin dependent protein kinase ID	CAMK1D	Q8IU85	pubchem
Hongqu (red yeast rice)	MOL000098	quercetin	calcium/calmodulin dependent protein kinase ID	CAMK1D	Q8IU85	pubchem
Luhui (Aloe vera)	MOL000098	quercetin	calcium/calmodulin dependent protein kinase IG	CAMK1G	Q96NX5	pubchem
Huanglian (Coptidis Rhizoma)	MOL000098	quercetin	calcium/calmodulin dependent protein kinase IG	CAMK1G	Q96NX5	pubchem
Hongqu (red yeast rice)	MOL000098	quercetin	calcium/calmodulin dependent protein kinase IG	CAMK1G	Q96NX5	pubchem
Luhui (Aloe vera)	MOL000098	quercetin	calcium/calmodulin dependent protein kinase II alpha	CAMK2A	Q9UQM7	pubchem
Huanglian (Coptidis Rhizoma)	MOL000098	quercetin	calcium/calmodulin dependent protein kinase II alpha	CAMK2A	Q9UQM7	pubchem
Hongqu (red yeast rice)	MOL000098	quercetin	calcium/calmodulin dependent protein kinase II alpha	CAMK2A	Q9UQM7	pubchem
Luhui (Aloe vera)	MOL000098	quercetin	calcium/calmodulin dependent protein kinase II beta	CAMK2B	Q13554	pubchem
Huanglian (Coptidis Rhizoma)	MOL000098	quercetin	calcium/calmodulin dependent protein kinase II beta	CAMK2B	Q13554	pubchem
Hongqu (red yeast rice)	MOL000098	quercetin	calcium/calmodulin dependent protein kinase II beta	CAMK2B	Q13554	pubchem
Luhui (Aloe vera)	MOL000098	quercetin	calcium/calmodulin dependent protein kinase II delta	CAMK2D	Q13557	pubchem
Huanglian (Coptidis Rhizoma)	MOL000098	quercetin	calcium/calmodulin dependent protein kinase II delta	CAMK2D	Q13557	pubchem
Hongqu (red yeast rice)	MOL000098	quercetin	calcium/calmodulin dependent protein kinase II delta	CAMK2D	Q13557	pubchem
Luhui (Aloe vera)	MOL000098	quercetin	calcium/calmodulin dependent protein kinase II gamma	CAMK2G	Q13555	pubchem
Huanglian (Coptidis Rhizoma)	MOL000098	quercetin	calcium/calmodulin dependent protein kinase II gamma	CAMK2G	Q13555	pubchem
Hongqu (red yeast rice)	MOL000098	quercetin	calcium/calmodulin dependent protein kinase II gamma	CAMK2G	Q13555	pubchem
Luhui (Aloe vera)	MOL000098	quercetin	calcium/calmodulin dependent protein kinase IV	CAMK4	Q16566	pubchem
Huanglian (Coptidis Rhizoma)	MOL000098	quercetin	calcium/calmodulin dependent protein kinase IV	CAMK4	Q16566	pubchem
Hongqu (red yeast rice)	MOL000098	quercetin	calcium/calmodulin dependent protein kinase IV	CAMK4	Q16566	pubchem
Luhui (Aloe vera)	MOL000098	quercetin	calcium/calmodulin dependent protein kinase kinase 2	CAMKK2	Q96RR4	pubchem
Huanglian (Coptidis Rhizoma)	MOL000098	quercetin	calcium/calmodulin dependent protein kinase kinase 2	CAMKK2	Q96RR4	pubchem
Hongqu (red yeast rice)	MOL000098	quercetin	calcium/calmodulin dependent protein kinase kinase 2	CAMKK2	Q96RR4	pubchem
Luhui (Aloe vera)	MOL000471	aloe-emodin	Caspase-3	CASP3	P42574	pubchem
Luhui (Aloe vera)	MOL001439	arachidonic acid	Caspase-3	CASP3	P42574	pubchem
Luhui (Aloe vera)	MOL002773	beta-carotene	Caspase-3	CASP3	P42574	pubchem
Danshen (Radix Salviae)	MOL007077	sclareol	Caspase-3	CASP3	P42574	pubchem
Luhui (Aloe vera)	MOL000359	sitosterol	Caspase-3	CASP3	P42574	pubchem
Danshen (Radix Salviae)	MOL007077	sclareol	Caspase-3	CASP3	P42574	pubchem
Danshen (Radix Salviae)	MOL007156	tanshinone Ⅵ	Caspase-3	CASP3	P42574	pubchem
Danshen (Radix Salviae)	MOL007154	tanshinone iia	Caspase-3	CASP3	P42574	pubchem
Luhui (Aloe vera)	MOL002773	beta-carotene	Caspase-7	CASP7	P55210	pubchem
Danshen (Radix Salviae)	MOL007077	sclareol	Caspase-7	CASP7	P55210	pubchem
Luhui (Aloe vera)	MOL002773	beta-carotene	Caspase-8	CASP8	Q14790	pubchem
Luhui (Aloe vera)	MOL000359	sitosterol	Caspase-8	CASP8	Q14790	pubchem
Luhui (Aloe vera)	MOL002773	beta-carotene	Caspase-9	CASP9	P55211	pubchem
Luhui (Aloe vera)	MOL000359	sitosterol	Caspase-9	CASP9	P55211	pubchem
Danshen (Radix Salviae)	MOL007156	tanshinone Ⅵ	caspase 9	CASP9	P55211	pubchem
Danshen (Radix Salviae)	MOL007154	tanshinone iia	caspase 9	CASP9	P55211	pubchem
Zhimu (Anemarrhenae Rhizoma)	MOL000422	kaempferol	catalase	CAT	P04040	pubchem
Luhui (Aloe vera)	MOL002773	beta-carotene	Caveolin-1	CAV1	Q03135	pubchem
Luhui (Aloe vera)	MOL000098	quercetin	carbonyl reductase 1	CBR1	P16152	pubchem
Huanglian (Coptidis Rhizoma)	MOL000098	quercetin	carbonyl reductase 1	CBR1	P16152	pubchem
Hongqu (red yeast rice)	MOL000098	quercetin	carbonyl reductase 1	CBR1	P16152	pubchem
Danshen (Radix Salviae)	MOL000006	luteolin	carbonyl reductase 3	CBR3	O75828	pubchem
Luhui (Aloe vera)	MOL000098	quercetin	carbonyl reductase 3	CBR3	O75828	pubchem
Huanglian (Coptidis Rhizoma)	MOL000098	quercetin	carbonyl reductase 3	CBR3	O75828	pubchem
Hongqu (red yeast rice)	MOL000098	quercetin	carbonyl reductase 3	CBR3	O75828	pubchem
Luhui (Aloe vera)	MOL000098	quercetin	chromobox 1	CBX1	P83916	pubchem
Huanglian (Coptidis Rhizoma)	MOL000098	quercetin	chromobox 1	CBX1	P83916	pubchem
Hongqu (red yeast rice)	MOL000098	quercetin	chromobox 1	CBX1	P83916	pubchem
Danshen (Radix Salviae)	MOL007156	tanshinone Ⅵ	chromobox 1	CBX1	P83916	pubchem
Danshen (Radix Salviae)	MOL007154	tanshinone iia	chromobox 1	CBX1	P83916	pubchem
Luhui (Aloe vera)	MOL000471	aloe-emodin	Cyclin-dependent kinase 2/cyclin A	CCNA2	P20248	pubchem
Luhui (Aloe vera)	MOL000471	aloe-emodin	Cyclin-dependent kinase 1/cyclin B	CCNB1	P14635	pubchem
Danshen (Radix Salviae)	MOL002776	Baicalin	Cyclin-dependent kinase 1/cyclin B	CCNB1	P14635	pubchem
Zhimu (Anemarrhenae Rhizoma)	MOL000422	kaempferol	Cyclin-dependent kinase 1/cyclin B	CCNB1	P14635	pubchem
Danshen (Radix Salviae)	MOL000006	luteolin	Cyclin-dependent kinase 1/cyclin B	CCNB1	P14635	pubchem
Luhui (Aloe vera)	MOL000098	quercetin	Cyclin-dependent kinase 1/cyclin B	CCNB1	P14635	pubchem
Huanglian (Coptidis Rhizoma)	MOL000098	quercetin	Cyclin-dependent kinase 1/cyclin B	CCNB1	P14635	pubchem
Hongqu (red yeast rice)	MOL000098	quercetin	Cyclin-dependent kinase 1/cyclin B	CCNB1	P14635	pubchem
Zhimu (Anemarrhenae Rhizoma)	MOL000422	kaempferol	cyclin B2	CCNB2	O95067	pubchem
Danshen (Radix Salviae)	MOL000006	luteolin	cyclin B2	CCNB2	O95067	pubchem
Luhui (Aloe vera)	MOL000098	quercetin	cyclin B2	CCNB2	O95067	pubchem
Huanglian (Coptidis Rhizoma)	MOL000098	quercetin	cyclin B2	CCNB2	O95067	pubchem
Hongqu (red yeast rice)	MOL000098	quercetin	cyclin B2	CCNB2	O95067	pubchem
Zhimu (Anemarrhenae Rhizoma)	MOL000422	kaempferol	cyclin B3	CCNB3	Q8WWL7	pubchem
Danshen (Radix Salviae)	MOL000006	luteolin	cyclin B3	CCNB3	Q8WWL7	pubchem
Luhui (Aloe vera)	MOL000098	quercetin	cyclin B3	CCNB3	Q8WWL7	pubchem
Huanglian (Coptidis Rhizoma)	MOL000098	quercetin	cyclin B3	CCNB3	Q8WWL7	pubchem
Hongqu (red yeast rice)	MOL000098	quercetin	cyclin B3	CCNB3	Q8WWL7	pubchem
Luhui (Aloe vera)	MOL001439	arachidonic acid	Cyclin-dependent kinase 4/cyclin D1	CCND1	P24385	pubchem
Luhui (Aloe vera)	MOL002773	beta-carotene	Cyclin-dependent kinase 4/cyclin D1	CCND1	P24385	pubchem
Luhui (Aloe vera)	MOL000098	quercetin	Cyclin-dependent kinase 4/cyclin D1	CCND1	P24385	pubchem
Huanglian (Coptidis Rhizoma)	MOL000098	quercetin	Cyclin-dependent kinase 4/cyclin D1	CCND1	P24385	pubchem
Hongqu (red yeast rice)	MOL000098	quercetin	Cyclin-dependent kinase 4/cyclin D1	CCND1	P24385	pubchem
Luhui (Aloe vera)	MOL000098	quercetin	C-C chemokine receptor type 4	CCR4	P51679	pubchem
Huanglian (Coptidis Rhizoma)	MOL000098	quercetin	C-C chemokine receptor type 4	CCR4	P51679	pubchem
Hongqu (red yeast rice)	MOL000098	quercetin	C-C chemokine receptor type 4	CCR4	P51679	pubchem
Danshen (Radix Salviae)	MOL000006	luteolin	Lymphocyte differentiation antigen CD38	CD38	P28907	pubchem
Luhui (Aloe vera)	MOL000098	quercetin	Lymphocyte differentiation antigen CD38	CD38	P28907	pubchem
Huanglian (Coptidis Rhizoma)	MOL000098	quercetin	Lymphocyte differentiation antigen CD38	CD38	P28907	pubchem
Hongqu (red yeast rice)	MOL000098	quercetin	Lymphocyte differentiation antigen CD38	CD38	P28907	pubchem
Luhui (Aloe vera)	MOL000098	quercetin	CD47 molecule	CD47	Q08722	pubchem
Huanglian (Coptidis Rhizoma)	MOL000098	quercetin	CD47 molecule	CD47	Q08722	pubchem
Hongqu (red yeast rice)	MOL000098	quercetin	CD47 molecule	CD47	Q08722	pubchem
Danshen (Radix Salviae)	MOL007122	Miltirone	Dual specificity phosphatase Cdc25A	CDC25A	P30304	pubchem
Luhui (Aloe vera)	MOL000471	aloe-emodin	Cyclin-dependent kinase 1	CDK1	P06493	pubchem
Danshen (Radix Salviae)	MOL002776	Baicalin	Cyclin-dependent kinase 1	CDK1	P06493	pubchem
Zhimu (Anemarrhenae Rhizoma)	MOL000422	kaempferol	Cyclin-dependent kinase 1	CDK1	P06493	pubchem
Danshen (Radix Salviae)	MOL000006	luteolin	Cyclin-dependent kinase 1	CDK1	P06493	pubchem
Luhui (Aloe vera)	MOL000098	quercetin	Cyclin-dependent kinase 1	CDK1	P06493	pubchem
Huanglian (Coptidis Rhizoma)	MOL000098	quercetin	Cyclin-dependent kinase 1	CDK1	P06493	pubchem
Hongqu (red yeast rice)	MOL000098	quercetin	Cyclin-dependent kinase 1	CDK1	P06493	pubchem
Luhui (Aloe vera)	MOL000098	quercetin	cyclin dependent kinase 16	CDK16	Q00536	pubchem
Huanglian (Coptidis Rhizoma)	MOL000098	quercetin	cyclin dependent kinase 16	CDK16	Q00536	pubchem
Hongqu (red yeast rice)	MOL000098	quercetin	cyclin dependent kinase 16	CDK16	Q00536	pubchem
Luhui (Aloe vera)	MOL000471	aloe-emodin	Cyclin-dependent kinase 2	CDK2	P24941	pubchem
Luhui (Aloe vera)	MOL001439	arachidonic acid	Cyclin-dependent kinase 2	CDK2	P24941	pubchem
Danshen (Radix Salviae)	MOL000006	luteolin	Cyclin-dependent kinase 2	CDK2	P24941	pubchem
Luhui (Aloe vera)	MOL000098	quercetin	Cyclin-dependent kinase 2	CDK2	P24941	pubchem
Huanglian (Coptidis Rhizoma)	MOL000098	quercetin	Cyclin-dependent kinase 2	CDK2	P24941	pubchem
Hongqu (red yeast rice)	MOL000098	quercetin	Cyclin-dependent kinase 2	CDK2	P24941	pubchem
Luhui (Aloe vera)	MOL001439	arachidonic acid	Cyclin-dependent kinase 4	CDK4	P11802	pubchem
Luhui (Aloe vera)	MOL000098	quercetin	Cyclin-dependent kinase 4	CDK4	P11802	pubchem
Huanglian (Coptidis Rhizoma)	MOL000098	quercetin	Cyclin-dependent kinase 4	CDK4	P11802	pubchem
Hongqu (red yeast rice)	MOL000098	quercetin	Cyclin-dependent kinase 4	CDK4	P11802	pubchem
Zhimu (Anemarrhenae Rhizoma)	MOL000422	kaempferol	cyclin dependent kinase 5	CDK5	Q00535	pubchem
Danshen (Radix Salviae)	MOL000006	luteolin	cyclin dependent kinase 5	CDK5	Q00535	pubchem
Luhui (Aloe vera)	MOL000098	quercetin	cyclin dependent kinase 5	CDK5	Q00535	pubchem
Huanglian (Coptidis Rhizoma)	MOL000098	quercetin	cyclin dependent kinase 5	CDK5	Q00535	pubchem
Hongqu (red yeast rice)	MOL000098	quercetin	cyclin dependent kinase 5	CDK5	Q00535	pubchem
Zhimu (Anemarrhenae Rhizoma)	MOL000422	kaempferol	cyclin dependent kinase 5 regulatory subunit 1	CDK5R1	Q15078	pubchem
Danshen (Radix Salviae)	MOL000006	luteolin	cyclin dependent kinase 5 regulatory subunit 1	CDK5R1	Q15078	pubchem
Luhui (Aloe vera)	MOL000098	quercetin	cyclin dependent kinase 5 regulatory subunit 1	CDK5R1	Q15078	pubchem
Huanglian (Coptidis Rhizoma)	MOL000098	quercetin	cyclin dependent kinase 5 regulatory subunit 1	CDK5R1	Q15078	pubchem
Hongqu (red yeast rice)	MOL000098	quercetin	cyclin dependent kinase 5 regulatory subunit 1	CDK5R1	Q15078	pubchem
Zhimu (Anemarrhenae Rhizoma)	MOL000422	kaempferol	cyclin dependent kinase 6	CDK6	Q00534	pubchem
Danshen (Radix Salviae)	MOL000006	luteolin	cyclin dependent kinase 6	CDK6	Q00534	pubchem
Luhui (Aloe vera)	MOL000098	quercetin	cyclin dependent kinase 6	CDK6	Q00534	pubchem
Huanglian (Coptidis Rhizoma)	MOL000098	quercetin	cyclin dependent kinase 6	CDK6	Q00534	pubchem
Hongqu (red yeast rice)	MOL000098	quercetin	cyclin dependent kinase 6	CDK6	Q00534	pubchem
Luhui (Aloe vera)	MOL000098	quercetin	cyclin dependent kinase like 1	CDKL1	Q00532	pubchem
Huanglian (Coptidis Rhizoma)	MOL000098	quercetin	cyclin dependent kinase like 1	CDKL1	Q00532	pubchem
Hongqu (red yeast rice)	MOL000098	quercetin	cyclin dependent kinase like 1	CDKL1	Q00532	pubchem
Luhui (Aloe vera)	MOL000471	aloe-emodin	Cyclin-dependent kinase inhibitor 1	CDKN1A	P38936	pubchem
Danshen (Radix Salviae)	MOL007088	cryptotanshinone	Acyl coenzyme A:cholesterol acyltransferase	CES1	P23141	pubchem
Danshen (Radix Salviae)	MOL007101	dihydrotanshinoneⅠ	Acyl coenzyme A:cholesterol acyltransferase	CES1	P23141	pubchem
Danshen (Radix Salviae)	MOL007122	Miltirone	Acyl coenzyme A:cholesterol acyltransferase	CES1	P23141	pubchem
Danshen (Radix Salviae)	MOL007156	tanshinone Ⅵ	Acyl coenzyme A:cholesterol acyltransferase	CES1	P23141	pubchem
Danshen (Radix Salviae)	MOL007154	tanshinone iia	Acyl coenzyme A:cholesterol acyltransferase	CES1	P23141	pubchem
Danshen (Radix Salviae)	MOL007088	cryptotanshinone	carboxylesterase 2	CES2	O00748	pubchem
Danshen (Radix Salviae)	MOL007101	dihydrotanshinoneⅠ	carboxylesterase 2	CES2	O00748	pubchem
Danshen (Radix Salviae)	MOL007122	Miltirone	carboxylesterase 2	CES2	O00748	pubchem
Danshen (Radix Salviae)	MOL007156	tanshinone Ⅵ	carboxylesterase 2	CES2	O00748	pubchem
Danshen (Radix Salviae)	MOL007154	tanshinone iia	carboxylesterase 2	CES2	O00748	pubchem
Luhui (Aloe vera)	MOL001439	arachidonic acid	Cholesteryl ester transfer protein	CETP	P11597	pubchem
Danshen (Radix Salviae)	MOL007088	cryptotanshinone	Cystic fibrosis transmembrane conductance regulator	CFTR	P13569	pubchem
Danshen (Radix Salviae)	MOL000006	luteolin	Cystic fibrosis transmembrane conductance regulator	CFTR	P13569	pubchem
Danshen (Radix Salviae)	MOL007156	tanshinone Ⅵ	Cystic fibrosis transmembrane conductance regulator	CFTR	P13569	pubchem
Danshen (Radix Salviae)	MOL007154	tanshinone iia	Cystic fibrosis transmembrane conductance regulator	CFTR	P13569	pubchem
Luhui (Aloe vera)	MOL000098	quercetin	checkpoint kinase 1	CHEK1	O14757	pubchem
Huanglian (Coptidis Rhizoma)	MOL000098	quercetin	checkpoint kinase 1	CHEK1	O14757	pubchem
Hongqu (red yeast rice)	MOL000098	quercetin	checkpoint kinase 1	CHEK1	O14757	pubchem
Luhui (Aloe vera)	MOL000098	quercetin	checkpoint kinase 2	CHEK2	O96017	pubchem
Huanglian (Coptidis Rhizoma)	MOL000098	quercetin	checkpoint kinase 2	CHEK2	O96017	pubchem
Hongqu (red yeast rice)	MOL000098	quercetin	checkpoint kinase 2	CHEK2	O96017	pubchem
Zhimu (Anemarrhenae Rhizoma)	MOL000422	kaempferol	Muscarinic acetylcholine receptor M1	CHRM1	P11229	pubchem
Zhimu (Anemarrhenae Rhizoma)	MOL000422	kaempferol	CDGSH iron sulfur domain 1	CISD1	Q9NZ45	pubchem
Luhui (Aloe vera)	MOL001439	arachidonic acid	chloride voltage-gated channel 2	CLCN2	P51788	pubchem
Zhimu (Anemarrhenae Rhizoma)	MOL000422	kaempferol	Dual specificty protein kinase CLK1	CLK1	P49759	pubchem
Danshen (Radix Salviae)	MOL000006	luteolin	Dual specificty protein kinase CLK1	CLK1	P49759	pubchem
Luhui (Aloe vera)	MOL000098	quercetin	Dual specificty protein kinase CLK1	CLK1	P49759	pubchem
Huanglian (Coptidis Rhizoma)	MOL000098	quercetin	Dual specificty protein kinase CLK1	CLK1	P49759	pubchem
Hongqu (red yeast rice)	MOL000098	quercetin	Dual specificty protein kinase CLK1	CLK1	P49759	pubchem
Luhui (Aloe vera)	MOL000098	quercetin	Dual specificity protein kinase CLK2	CLK2	P49760	pubchem
Huanglian (Coptidis Rhizoma)	MOL000098	quercetin	Dual specificity protein kinase CLK2	CLK2	P49760	pubchem
Hongqu (red yeast rice)	MOL000098	quercetin	Dual specificity protein kinase CLK2	CLK2	P49760	pubchem
Danshen (Radix Salviae)	MOL000006	luteolin	Dual specificity protein kinase CLK3	CLK3	P49761	pubchem
Luhui (Aloe vera)	MOL000098	quercetin	Dual specificity protein kinase CLK3	CLK3	P49761	pubchem
Huanglian (Coptidis Rhizoma)	MOL000098	quercetin	Dual specificity protein kinase CLK3	CLK3	P49761	pubchem
Hongqu (red yeast rice)	MOL000098	quercetin	Dual specificity protein kinase CLK3	CLK3	P49761	pubchem
Luhui (Aloe vera)	MOL001439	arachidonic acid	Collagen alpha-2(I) chain	COL1A2	P08123	pubchem
Luhui (Aloe vera)	MOL000098	quercetin	casein kinase 1 gamma 1	CSNK1G1	Q9HCP0	pubchem
Huanglian (Coptidis Rhizoma)	MOL000098	quercetin	casein kinase 1 gamma 1	CSNK1G1	Q9HCP0	pubchem
Hongqu (red yeast rice)	MOL000098	quercetin	casein kinase 1 gamma 1	CSNK1G1	Q9HCP0	pubchem
Danshen (Radix Salviae)	MOL000006	luteolin	casein kinase 1 gamma 2	CSNK1G2	P78368	pubchem
Luhui (Aloe vera)	MOL000098	quercetin	casein kinase 1 gamma 2	CSNK1G2	P78368	pubchem
Huanglian (Coptidis Rhizoma)	MOL000098	quercetin	casein kinase 1 gamma 2	CSNK1G2	P78368	pubchem
Hongqu (red yeast rice)	MOL000098	quercetin	casein kinase 1 gamma 2	CSNK1G2	P78368	pubchem
Luhui (Aloe vera)	MOL000098	quercetin	casein kinase 1 gamma 3	CSNK1G3	Q9Y6M4	pubchem
Huanglian (Coptidis Rhizoma)	MOL000098	quercetin	casein kinase 1 gamma 3	CSNK1G3	Q9Y6M4	pubchem
Hongqu (red yeast rice)	MOL000098	quercetin	casein kinase 1 gamma 3	CSNK1G3	Q9Y6M4	pubchem
Zhimu (Anemarrhenae Rhizoma)	MOL000422	kaempferol	Casein kinase II alpha	CSNK2A1	P68400	pubchem
Danshen (Radix Salviae)	MOL000006	luteolin	Casein kinase II alpha	CSNK2A1	P68400	pubchem
Luhui (Aloe vera)	MOL000098	quercetin	Casein kinase II alpha	CSNK2A1	P68400	pubchem
Huanglian (Coptidis Rhizoma)	MOL000098	quercetin	Casein kinase II alpha	CSNK2A1	P68400	pubchem
Hongqu (red yeast rice)	MOL000098	quercetin	Casein kinase II alpha	CSNK2A1	P68400	pubchem
Zhimu (Anemarrhenae Rhizoma)	MOL000422	kaempferol	Casein kinase II alpha (prime)	CSNK2A2	P19784	pubchem
Danshen (Radix Salviae)	MOL000006	luteolin	Casein kinase II alpha (prime)	CSNK2A2	P19784	pubchem
Luhui (Aloe vera)	MOL000098	quercetin	Casein kinase II alpha (prime)	CSNK2A2	P19784	pubchem
Huanglian (Coptidis Rhizoma)	MOL000098	quercetin	Casein kinase II alpha (prime)	CSNK2A2	P19784	pubchem
Hongqu (red yeast rice)	MOL000098	quercetin	Casein kinase II alpha (prime)	CSNK2A2	P19784	pubchem
Zhimu (Anemarrhenae Rhizoma)	MOL000422	kaempferol	casein kinase 2 beta	CSNK2B	P67870	pubchem
Danshen (Radix Salviae)	MOL000006	luteolin	casein kinase 2 beta	CSNK2B	P67870	pubchem
Luhui (Aloe vera)	MOL000098	quercetin	casein kinase 2 beta	CSNK2B	P67870	pubchem
Huanglian (Coptidis Rhizoma)	MOL000098	quercetin	casein kinase 2 beta	CSNK2B	P67870	pubchem
Hongqu (red yeast rice)	MOL000098	quercetin	casein kinase 2 beta	CSNK2B	P67870	pubchem
Zhimu (Anemarrhenae Rhizoma)	MOL000422	kaempferol	CTD small phosphatase 1	CTDSP1	Q9GZU7	pubchem
Luhui (Aloe vera)	MOL002773	beta-carotene	Catenin beta-1	CTNNB1	P35222	pubchem
Luhui (Aloe vera)	MOL000098	quercetin	chymotrypsinogen B1	CTRB1	P17538	pubchem
Huanglian (Coptidis Rhizoma)	MOL000098	quercetin	chymotrypsinogen B1	CTRB1	P17538	pubchem
Hongqu (red yeast rice)	MOL000098	quercetin	chymotrypsinogen B1	CTRB1	P17538	pubchem
Luhui (Aloe vera)	MOL000098	quercetin	chymotrypsin C	CTRC	Q99895	pubchem
Huanglian (Coptidis Rhizoma)	MOL000098	quercetin	chymotrypsin C	CTRC	Q99895	pubchem
Hongqu (red yeast rice)	MOL000098	quercetin	chymotrypsin C	CTRC	Q99895	pubchem
Luhui (Aloe vera)	MOL000471	aloe-emodin	Cathepsin G	CTSG	P08311	pubchem
Luhui (Aloe vera)	MOL001439	arachidonic acid	cathepsin L1	CTSL	P07711	pubchem
Huanglian (Coptidis Rhizoma)	MOL002897	epiberberine	cathepsin L1	CTSL	P07711	pubchem
Zhimu (Anemarrhenae Rhizoma)	MOL000422	kaempferol	C-X-C motif chemokine ligand 8	CXCL8	P10145	pubchem
Luhui (Aloe vera)	MOL000098	quercetin	Interleukin-8 receptor A	CXCR1	P25024	pubchem
Huanglian (Coptidis Rhizoma)	MOL000098	quercetin	Interleukin-8 receptor A	CXCR1	P25024	pubchem
Hongqu (red yeast rice)	MOL000098	quercetin	Interleukin-8 receptor A	CXCR1	P25024	pubchem
Danshen (Radix Salviae)	MOL000006	luteolin	cytochrome b-245 beta chain -	CYBB	P04839	pubchem
Luhui (Aloe vera)	MOL000471	aloe-emodin	Cytochrome P450 19A1	CYP19A1	P11511	pubchem
Luhui (Aloe vera)	MOL001439	arachidonic acid	Cytochrome P450 19A1	CYP19A1	P11511	pubchem
Zhimu (Anemarrhenae Rhizoma)	MOL000422	kaempferol	Cytochrome P450 19A1	CYP19A1	P11511	pubchem
Luhui (Aloe vera)	MOL000098	quercetin	Cytochrome P450 19A1	CYP19A1	P11511	pubchem
Huanglian (Coptidis Rhizoma)	MOL000098	quercetin	Cytochrome P450 19A1	CYP19A1	P11511	pubchem
Hongqu (red yeast rice)	MOL000098	quercetin	Cytochrome P450 19A1	CYP19A1	P11511	pubchem
Danshen (Radix Salviae)	MOL007077	sclareol	Cytochrome P450 19A1	CYP19A1	P11511	pubchem
Zhimu (Anemarrhenae Rhizoma)	MOL000422	kaempferol	cytochrome P450 family 1 subfamily A member 1	CYP1A1	P04798	pubchem
Danshen (Radix Salviae)	MOL000006	luteolin	cytochrome P450 family 1 subfamily A member 1	CYP1A1	P04798	pubchem
Luhui (Aloe vera)	MOL000098	quercetin	cytochrome P450 family 1 subfamily A member 1	CYP1A1	P04798	pubchem
Huanglian (Coptidis Rhizoma)	MOL000098	quercetin	cytochrome P450 family 1 subfamily A member 1	CYP1A1	P04798	pubchem
Hongqu (red yeast rice)	MOL000098	quercetin	cytochrome P450 family 1 subfamily A member 1	CYP1A1	P04798	pubchem
Luhui (Aloe vera)	MOL002773	beta-carotene	Cytochrome P450 1A2	CYP1A2	P05177	pubchem
Huanglian (Coptidis Rhizoma)	MOL002903	(R)-Canadine	cytochrome P450 family 1 subfamily A member 2	CYP1A2	P05177	pubchem
Huanglian (Coptidis Rhizoma)	MOL001454	berberine	cytochrome P450 family 1 subfamily A member 2	CYP1A2	P05177	pubchem
Zhimu (Anemarrhenae Rhizoma)	MOL000422	kaempferol	cytochrome P450 family 1 subfamily A member 2	CYP1A2	P05177	pubchem
Danshen (Radix Salviae)	MOL000006	luteolin	cytochrome P450 family 1 subfamily A member 2	CYP1A2	P05177	pubchem
Luhui (Aloe vera)	MOL000098	quercetin	cytochrome P450 family 1 subfamily A member 2	CYP1A2	P05177	pubchem
Huanglian (Coptidis Rhizoma)	MOL000098	quercetin	cytochrome P450 family 1 subfamily A member 2	CYP1A2	P05177	pubchem
Hongqu (red yeast rice)	MOL000098	quercetin	cytochrome P450 family 1 subfamily A member 2	CYP1A2	P05177	pubchem
Zhimu (Anemarrhenae Rhizoma)	MOL000422	kaempferol	cytochrome P450 family 1 subfamily B member 1	CYP1B1	Q16678	pubchem
Danshen (Radix Salviae)	MOL000006	luteolin	cytochrome P450 family 1 subfamily B member 1	CYP1B1	Q16678	pubchem
Luhui (Aloe vera)	MOL000098	quercetin	cytochrome P450 family 1 subfamily B member 1	CYP1B1	Q16678	pubchem
Huanglian (Coptidis Rhizoma)	MOL000098	quercetin	cytochrome P450 family 1 subfamily B member 1	CYP1B1	Q16678	pubchem
Hongqu (red yeast rice)	MOL000098	quercetin	cytochrome P450 family 1 subfamily B member 1	CYP1B1	Q16678	pubchem
Luhui (Aloe vera)	MOL002773	beta-carotene	Cytochrome P450 2B1	Cyp2b1	P00176	pubchem
Huanglian (Coptidis Rhizoma)	MOL002903	(R)-Canadine	Cytochrome P450 2C19	CYP2C19	P33261	pubchem
Zhimu (Anemarrhenae Rhizoma)	MOL000422	kaempferol	Cytochrome P450 2C19	CYP2C19	P33261	pubchem
Danshen (Radix Salviae)	MOL000006	luteolin	Cytochrome P450 2C19	CYP2C19	P33261	pubchem
Luhui (Aloe vera)	MOL000098	quercetin	Cytochrome P450 2C19	CYP2C19	P33261	pubchem
Huanglian (Coptidis Rhizoma)	MOL000098	quercetin	Cytochrome P450 2C19	CYP2C19	P33261	pubchem
Hongqu (red yeast rice)	MOL000098	quercetin	Cytochrome P450 2C19	CYP2C19	P33261	pubchem
Luhui (Aloe vera)	MOL000098	quercetin	cytochrome P450 family 2 subfamily C member 8	CYP2C8	P10632	pubchem
Huanglian (Coptidis Rhizoma)	MOL000098	quercetin	cytochrome P450 family 2 subfamily C member 8	CYP2C8	P10632	pubchem
Hongqu (red yeast rice)	MOL000098	quercetin	cytochrome P450 family 2 subfamily C member 8	CYP2C8	P10632	pubchem
Zhimu (Anemarrhenae Rhizoma)	MOL000422	kaempferol	Cytochrome P450 2C9	CYP2C9	P11712	pubchem
Danshen (Radix Salviae)	MOL000006	luteolin	Cytochrome P450 2C9	CYP2C9	P11712	pubchem
Luhui (Aloe vera)	MOL000098	quercetin	Cytochrome P450 2C9	CYP2C9	P11712	pubchem
Huanglian (Coptidis Rhizoma)	MOL000098	quercetin	Cytochrome P450 2C9	CYP2C9	P11712	pubchem
Hongqu (red yeast rice)	MOL000098	quercetin	Cytochrome P450 2C9	CYP2C9	P11712	pubchem
Huanglian (Coptidis Rhizoma)	MOL002903	(R)-Canadine	Cytochrome P450 2D6	CYP2D6	P10635	pubchem
Huanglian (Coptidis Rhizoma)	MOL001454	berberine	Cytochrome P450 2D6	CYP2D6	P10635	pubchem
Huanglian (Coptidis Rhizoma)	MOL000358	beta-sitosterol	Cytochrome P450 2D6	CYP2D6	P10635	pubchem
Zhimu (Anemarrhenae Rhizoma)	MOL000422	kaempferol	Cytochrome P450 2D6	CYP2D6	P10635	pubchem
Danshen (Radix Salviae)	MOL000006	luteolin	Cytochrome P450 2D6	CYP2D6	P10635	pubchem
Huanglian (Coptidis Rhizoma)	MOL000785	palmatine	Cytochrome P450 2D6	CYP2D6	P10635	pubchem
Luhui (Aloe vera)	MOL000098	quercetin	Cytochrome P450 2D6	CYP2D6	P10635	pubchem
Huanglian (Coptidis Rhizoma)	MOL000098	quercetin	Cytochrome P450 2D6	CYP2D6	P10635	pubchem
Hongqu (red yeast rice)	MOL000098	quercetin	Cytochrome P450 2D6	CYP2D6	P10635	pubchem
Luhui (Aloe vera)	MOL000359	sitosterol	Cytochrome P450 2D6	CYP2D6	P10635	pubchem
Luhui (Aloe vera)	MOL000098	quercetin	cytochrome P450 family 2 subfamily J member 2	CYP2J2	P51589	pubchem
Huanglian (Coptidis Rhizoma)	MOL000098	quercetin	cytochrome P450 family 2 subfamily J member 2	CYP2J2	P51589	pubchem
Hongqu (red yeast rice)	MOL000098	quercetin	cytochrome P450 family 2 subfamily J member 2	CYP2J2	P51589	pubchem
Luhui (Aloe vera)	MOL002773	beta-carotene	Cytochrome P450 3A4	CYP3A4	P08684	pubchem
Huanglian (Coptidis Rhizoma)	MOL002903	(R)-Canadine	Cytochrome P450 3A4	CYP3A4	P08684	pubchem
Huanglian (Coptidis Rhizoma)	MOL001454	berberine	Cytochrome P450 3A4	CYP3A4	P08684	pubchem
Luhui (Aloe vera)	MOL002773	beta-carotene	Cytochrome P450 3A4	CYP3A4	P08684	pubchem
Huanglian (Coptidis Rhizoma)	MOL000358	beta-sitosterol	Cytochrome P450 3A4	CYP3A4	P08684	pubchem
Zhimu (Anemarrhenae Rhizoma)	MOL000422	kaempferol	Cytochrome P450 3A4	CYP3A4	P08684	pubchem
Danshen (Radix Salviae)	MOL000006	luteolin	Cytochrome P450 3A4	CYP3A4	P08684	pubchem
Luhui (Aloe vera)	MOL000098	quercetin	Cytochrome P450 3A4	CYP3A4	P08684	pubchem
Huanglian (Coptidis Rhizoma)	MOL000098	quercetin	Cytochrome P450 3A4	CYP3A4	P08684	pubchem
Hongqu (red yeast rice)	MOL000098	quercetin	Cytochrome P450 3A4	CYP3A4	P08684	pubchem
Luhui (Aloe vera)	MOL000359	sitosterol	Cytochrome P450 3A4	CYP3A4	P08684	pubchem
Danshen (Radix Salviae)	MOL007156	tanshinone Ⅵ	diacylglycerol lipase beta	DAGLB	Q8NCG7	pubchem
Danshen (Radix Salviae)	MOL007154	tanshinone iia	diacylglycerol lipase beta	DAGLB	Q8NCG7	pubchem
Zhimu (Anemarrhenae Rhizoma)	MOL000422	kaempferol	death associated protein kinase 1	DAPK1	P53355	pubchem
Danshen (Radix Salviae)	MOL000006	luteolin	death associated protein kinase 1	DAPK1	P53355	pubchem
Luhui (Aloe vera)	MOL000098	quercetin	death associated protein kinase 1	DAPK1	P53355	pubchem
Huanglian (Coptidis Rhizoma)	MOL000098	quercetin	death associated protein kinase 1	DAPK1	P53355	pubchem
Hongqu (red yeast rice)	MOL000098	quercetin	death associated protein kinase 1	DAPK1	P53355	pubchem
Luhui (Aloe vera)	MOL000098	quercetin	death associated protein kinase 3	DAPK3	O43293	pubchem
Huanglian (Coptidis Rhizoma)	MOL000098	quercetin	death associated protein kinase 3	DAPK3	O43293	pubchem
Hongqu (red yeast rice)	MOL000098	quercetin	death associated protein kinase 3	DAPK3	O43293	pubchem
Luhui (Aloe vera)	MOL000098	quercetin	DIRAS family GTPase 1	DIRAS1	O95057	pubchem
Huanglian (Coptidis Rhizoma)	MOL000098	quercetin	DIRAS family GTPase 1	DIRAS1	O95057	pubchem
Hongqu (red yeast rice)	MOL000098	quercetin	DIRAS family GTPase 1	DIRAS1	O95057	pubchem
Luhui (Aloe vera)	MOL000098	quercetin	DM1 protein kinase	DMPK	Q09013	pubchem
Huanglian (Coptidis Rhizoma)	MOL000098	quercetin	DM1 protein kinase	DMPK	Q09013	pubchem
Hongqu (red yeast rice)	MOL000098	quercetin	DM1 protein kinase	DMPK	Q09013	pubchem
Danshen (Radix Salviae)	MOL007156	tanshinone Ⅵ	DNA methyltransferase 1	DNMT1	P26358	pubchem
Danshen (Radix Salviae)	MOL007154	tanshinone iia	DNA methyltransferase 1	DNMT1	P26358	pubchem
Danshen (Radix Salviae)	MOL002776	Baicalin	Dipeptidyl peptidase IV	DPP4	P27487	pubchem
Huanglian (Coptidis Rhizoma)	MOL000358	beta-sitosterol	Dipeptidyl peptidase IV	DPP4	P27487	pubchem
Zhimu (Anemarrhenae Rhizoma)	MOL000422	kaempferol	Dipeptidyl peptidase IV	DPP4	P27487	pubchem
Luhui (Aloe vera)	MOL000098	quercetin	Dipeptidyl peptidase IV	DPP4	P27487	pubchem
Huanglian (Coptidis Rhizoma)	MOL000098	quercetin	Dipeptidyl peptidase IV	DPP4	P27487	pubchem
Hongqu (red yeast rice)	MOL000098	quercetin	Dipeptidyl peptidase IV	DPP4	P27487	pubchem
Luhui (Aloe vera)	MOL000359	sitosterol	Dipeptidyl peptidase IV	DPP4	P27487	pubchem
Huanglian (Coptidis Rhizoma)	MOL002903	(R)-Canadine	Dopamine D1 receptor	DRD1	P21728	pubchem
Luhui (Aloe vera)	MOL000098	quercetin	Dopamine D1 receptor	DRD1	P21728	pubchem
Huanglian (Coptidis Rhizoma)	MOL000098	quercetin	Dopamine D1 receptor	DRD1	P21728	pubchem
Hongqu (red yeast rice)	MOL000098	quercetin	Dopamine D1 receptor	DRD1	P21728	pubchem
Huanglian (Coptidis Rhizoma)	MOL002903	(R)-Canadine	Dopamine D2 receptor	DRD2	P14416	pubchem
Luhui (Aloe vera)	MOL000471	aloe-emodin	Dopamine D2 receptor	DRD2	P14416	pubchem
Danshen (Radix Salviae)	MOL007156	tanshinone Ⅵ	Dopamine D2 receptor	DRD2	P14416	pubchem
Danshen (Radix Salviae)	MOL007154	tanshinone iia	Dopamine D2 receptor	DRD2	P14416	pubchem
Huanglian (Coptidis Rhizoma)	MOL002903	(R)-Canadine	Dopamine D3 receptor	DRD3	P35462	pubchem
Huanglian (Coptidis Rhizoma)	MOL002897	epiberberine	Dopamine D3 receptor	DRD3	P35462	pubchem
Danshen (Radix Salviae)	MOL000006	luteolin	Dopamine D3 receptor	DRD3	P35462	pubchem
Luhui (Aloe vera)	MOL000098	quercetin	Dopamine D4 receptor	DRD4	P21917	pubchem
Huanglian (Coptidis Rhizoma)	MOL000098	quercetin	Dopamine D4 receptor	DRD4	P21917	pubchem
Hongqu (red yeast rice)	MOL000098	quercetin	Dopamine D4 receptor	DRD4	P21917	pubchem
Zhimu (Anemarrhenae Rhizoma)	MOL000422	kaempferol	protein E6*;transforming protein E6 (Human papillomavirus type 16)	E6	P03126	pubchem
Luhui (Aloe vera)	MOL000098	quercetin	protein E6*;transforming protein E6 (Human papillomavirus type 16)	E6	P03126	pubchem
Huanglian (Coptidis Rhizoma)	MOL000098	quercetin	protein E6*;transforming protein E6 (Human papillomavirus type 16)	E6	P03126	pubchem
Hongqu (red yeast rice)	MOL000098	quercetin	protein E6*;transforming protein E6 (Human papillomavirus type 16)	E6	P03126	pubchem
Danshen (Radix Salviae)	MOL007152	Przewaquinone E	embryonic ectoderm development	EED	O75530	pubchem
Danshen (Radix Salviae)	MOL007151	Tanshindiol B	embryonic ectoderm development	EED	O75530	pubchem
Danshen (Radix Salviae)	MOL007156	tanshinone Ⅵ	embryonic ectoderm development	EED	O75530	pubchem
Danshen (Radix Salviae)	MOL007154	tanshinone iia	embryonic ectoderm development	EED	O75530	pubchem
Luhui (Aloe vera)	MOL001439	arachidonic acid	Pro-epidermal growth factor	EGF	P01133	pubchem
Luhui (Aloe vera)	MOL000471	aloe-emodin	epidermal growth factor receptor	EGFR	P00533	pubchem
Zhimu (Anemarrhenae Rhizoma)	MOL000422	kaempferol	epidermal growth factor receptor	EGFR	P00533	pubchem
Luhui (Aloe vera)	MOL000098	quercetin	epidermal growth factor receptor	EGFR	P00533	pubchem
Huanglian (Coptidis Rhizoma)	MOL000098	quercetin	epidermal growth factor receptor	EGFR	P00533	pubchem
Hongqu (red yeast rice)	MOL000098	quercetin	epidermal growth factor receptor	EGFR	P00533	pubchem
Luhui (Aloe vera)	MOL001439	arachidonic acid	euchromatic histone-lysine N-methyltransferase 2	EHMT2	Q96KQ7	pubchem
Huanglian (Coptidis Rhizoma)	MOL002897	epiberberine	euchromatic histone-lysine N-methyltransferase 2	EHMT2	Q96KQ7	pubchem
Kugua (Momordica charantia)	MOL010267	lycopene	euchromatic histone-lysine N-methyltransferase 2	EHMT2	Q96KQ7	pubchem
Luhui (Aloe vera)	MOL000098	quercetin	euchromatic histone-lysine N-methyltransferase 2	EHMT2	Q96KQ7	pubchem
Huanglian (Coptidis Rhizoma)	MOL000098	quercetin	euchromatic histone-lysine N-methyltransferase 2	EHMT2	Q96KQ7	pubchem
Hongqu (red yeast rice)	MOL000098	quercetin	euchromatic histone-lysine N-methyltransferase 2	EHMT2	Q96KQ7	pubchem
Danshen (Radix Salviae)	MOL007156	tanshinone Ⅵ	euchromatic histone-lysine N-methyltransferase 2	Ehmt2	Q9Z148	pubchem
Danshen (Radix Salviae)	MOL007154	tanshinone iia	euchromatic histone-lysine N-methyltransferase 2	Ehmt2	Q9Z148	pubchem
Danshen (Radix Salviae)	MOL007156	tanshinone Ⅵ	eukaryotic translation initiation factor 4H	EIF4H	Q15056	pubchem
Danshen (Radix Salviae)	MOL007154	tanshinone iia	eukaryotic translation initiation factor 4H	EIF4H	Q15056	pubchem
Huanglian (Coptidis Rhizoma)	MOL002897	epiberberine	eukaryotic translation initiation factor 4H	EIF4H	Q15056	pubchem
Luhui (Aloe vera)	MOL000471	aloe-emodin	Eukaryotic translation initiation factor 6	EIF6	P56537	pubchem
Luhui (Aloe vera)	MOL000471	aloe-emodin	elastase, neutrophil expressed	ELANE	P08246	pubchem
Luhui (Aloe vera)	MOL002773	beta-carotene	Elastin	ELN	P15502	pubchem
Danshen (Radix Salviae)	MOL007088	cryptotanshinone	endothelial PAS domain protein 1	EPAS1	Q99814	pubchem
Danshen (Radix Salviae)	MOL007101	dihydrotanshinoneⅠ	endothelial PAS domain protein 1	EPAS1	Q99814	pubchem
Danshen (Radix Salviae)	MOL007111	Isotanshinone II	endothelial PAS domain protein 1	EPAS1	Q99814	pubchem
Danshen (Radix Salviae)	MOL007156	tanshinone Ⅵ	endothelial PAS domain protein 1	EPAS1	Q99814	pubchem
Danshen (Radix Salviae)	MOL007154	tanshinone iia	endothelial PAS domain protein 1	EPAS1	Q99814	pubchem
Luhui (Aloe vera)	MOL000471	aloe-emodin	Epoxide hydratase	EPHX2	P34913	pubchem
Luhui (Aloe vera)	MOL000098	quercetin	Epoxide hydratase	EPHX2	P34913	pubchem
Huanglian (Coptidis Rhizoma)	MOL000098	quercetin	Epoxide hydratase	EPHX2	P34913	pubchem
Hongqu (red yeast rice)	MOL000098	quercetin	Epoxide hydratase	EPHX2	P34913	pubchem
Luhui (Aloe vera)	MOL000471	aloe-emodin	estrogen receptor 1	ESR1	P03372	pubchem
Zhimu (Anemarrhenae Rhizoma)	MOL000422	kaempferol	estrogen receptor 1	ESR1	P03372	pubchem
Kugua (Momordica charantia)	MOL010267	lycopene	estrogen receptor 1	ESR1	P03372	pubchem
Luhui (Aloe vera)	MOL000098	quercetin	estrogen receptor 1	ESR1	P03372	pubchem
Huanglian (Coptidis Rhizoma)	MOL000098	quercetin	estrogen receptor 1	ESR1	P03372	pubchem
Hongqu (red yeast rice)	MOL000098	quercetin	estrogen receptor 1	ESR1	P03372	pubchem
Danshen (Radix Salviae)	MOL007077	sclareol	estrogen receptor 1	ESR1	P03372	pubchem
Luhui (Aloe vera)	MOL000471	aloe-emodin	estrogen receptor 2	ESR2	Q92731	pubchem
Zhimu (Anemarrhenae Rhizoma)	MOL000422	kaempferol	estrogen receptor 2	ESR2	Q92731	pubchem
Luhui (Aloe vera)	MOL000098	quercetin	estrogen receptor 2	ESR2	Q92731	pubchem
Huanglian (Coptidis Rhizoma)	MOL000098	quercetin	estrogen receptor 2	ESR2	Q92731	pubchem
Hongqu (red yeast rice)	MOL000098	quercetin	estrogen receptor 2	ESR2	Q92731	pubchem
Danshen (Radix Salviae)	MOL007077	sclareol	estrogen receptor 2	ESR2	Q92731	pubchem
Luhui (Aloe vera)	MOL000471	aloe-emodin	Estrogen-related receptor alpha	ESRRA	P11474	pubchem
Zhimu (Anemarrhenae Rhizoma)	MOL000422	kaempferol	Estrogen-related receptor alpha	ESRRA	P11474	pubchem
Luhui (Aloe vera)	MOL000098	quercetin	Estrogen-related receptor alpha	ESRRA	P11474	pubchem
Huanglian (Coptidis Rhizoma)	MOL000098	quercetin	Estrogen-related receptor alpha	ESRRA	P11474	pubchem
Hongqu (red yeast rice)	MOL000098	quercetin	Estrogen-related receptor alpha	ESRRA	P11474	pubchem
Danshen (Radix Salviae)	MOL007077	sclareol	Estrogen-related receptor alpha	ESRRA	P11474	pubchem
Huanglian (Coptidis Rhizoma)	MOL001454	berberine	EWS/FLI fusion protein	EWS	B1PRL2	pubchem
Danshen (Radix Salviae)	MOL007088	cryptotanshinone	EWS/FLI fusion protein	EWS	B1PRL2	pubchem
Zhimu (Anemarrhenae Rhizoma)	MOL000422	kaempferol	EWS/FLI fusion protein	EWS	B1PRL2	pubchem
Luhui (Aloe vera)	MOL000098	quercetin	EWS/FLI fusion protein	EWS	B1PRL2	pubchem
Huanglian (Coptidis Rhizoma)	MOL000098	quercetin	EWS/FLI fusion protein	EWS	B1PRL2	pubchem
Hongqu (red yeast rice)	MOL000098	quercetin	EWS/FLI fusion protein	EWS	B1PRL2	pubchem
Danshen (Radix Salviae)	MOL007156	tanshinone Ⅵ	EWS/FLI fusion protein	EWS	B1PRL2	pubchem
Danshen (Radix Salviae)	MOL007154	tanshinone iia	EWS/FLI fusion protein	EWS	B1PRL2	pubchem
Hongqu (red yeast rice)	MOL000702	Guaijaverin	enhancer of zeste 2 polycomb repressive complex 2 subunit	EZH2	Q15910	pubchem
Danshen (Radix Salviae)	MOL007152	Przewaquinone E	enhancer of zeste 2 polycomb repressive complex 2 subunit	EZH2	Q15910	pubchem
Luhui (Aloe vera)	MOL000098	quercetin	enhancer of zeste 2 polycomb repressive complex 2 subunit	EZH2	Q15910	pubchem
Huanglian (Coptidis Rhizoma)	MOL000098	quercetin	enhancer of zeste 2 polycomb repressive complex 2 subunit	EZH2	Q15910	pubchem
Hongqu (red yeast rice)	MOL000098	quercetin	enhancer of zeste 2 polycomb repressive complex 2 subunit	EZH2	Q15910	pubchem
Danshen (Radix Salviae)	MOL007151	Tanshindiol B	enhancer of zeste 2 polycomb repressive complex 2 subunit	EZH2	Q15910	pubchem
Danshen (Radix Salviae)	MOL007156	tanshinone Ⅵ	enhancer of zeste 2 polycomb repressive complex 2 subunit	EZH2	Q15910	pubchem
Danshen (Radix Salviae)	MOL007154	tanshinone iia	enhancer of zeste 2 polycomb repressive complex 2 subunit	EZH2	Q15910	pubchem
Luhui (Aloe vera)	MOL000098	quercetin	coagulation factor II, thrombin	F2	P00734	pubchem
Huanglian (Coptidis Rhizoma)	MOL000098	quercetin	coagulation factor II, thrombin	F2	P00734	pubchem
Hongqu (red yeast rice)	MOL000098	quercetin	coagulation factor II, thrombin	F2	P00734	pubchem
Luhui (Aloe vera)	MOL002773	beta-carotene	Coagulation factor VII/tissue factor	F3	P13726	pubchem
Danshen (Radix Salviae)	MOL000006	luteolin	Enoyl-[acyl-carrier-protein] reductase [NADH] FabI (Escherichia coli K	fabI	P0AEK4	pubchem
Luhui (Aloe vera)	MOL001439	arachidonic acid	Fatty acid binding protein adipocyte	FABP4	P15090	pubchem
Luhui (Aloe vera)	MOL000471	aloe-emodin	Fatty acid synthase	FASN	P49327	pubchem
Danshen (Radix Salviae)	MOL000006	luteolin	Fatty acid synthase	FASN	P49327	pubchem
Danshen (Radix Salviae)	MOL007156	tanshinone Ⅵ	Fatty acid synthase	FASN	P49327	pubchem
Danshen (Radix Salviae)	MOL007154	tanshinone iia	Fatty acid synthase	FASN	P49327	pubchem
Luhui (Aloe vera)	MOL000471	aloe-emodin	flap structure-specific endonuclease 1	FEN1	P39748	pubchem
Huanglian (Coptidis Rhizoma)	MOL002897	epiberberine	flap structure-specific endonuclease 1	FEN1	P39748	pubchem
Zhimu (Anemarrhenae Rhizoma)	MOL000422	kaempferol	flap structure-specific endonuclease 1	FEN1	P39748	pubchem
Danshen (Radix Salviae)	MOL000006	luteolin	flap structure-specific endonuclease 1	FEN1	P39748	pubchem
Luhui (Aloe vera)	MOL000098	quercetin	flap structure-specific endonuclease 1	FEN1	P39748	pubchem
Huanglian (Coptidis Rhizoma)	MOL000098	quercetin	flap structure-specific endonuclease 1	FEN1	P39748	pubchem
Hongqu (red yeast rice)	MOL000098	quercetin	flap structure-specific endonuclease 1	FEN1	P39748	pubchem
Danshen (Radix Salviae)	MOL007156	tanshinone Ⅵ	flap structure-specific endonuclease 1	FEN1	P39748	pubchem
Danshen (Radix Salviae)	MOL007154	tanshinone iia	flap structure-specific endonuclease 1	FEN1	P39748	pubchem
Huanglian (Coptidis Rhizoma)	MOL002894	berberrubine	fibroblast growth factor 22	FGF22	Q9HCT0	pubchem
Zhimu (Anemarrhenae Rhizoma)	MOL000422	kaempferol	Tyrosine-protein kinase receptor FLT3	FLT3	P36888	pubchem
Danshen (Radix Salviae)	MOL000006	luteolin	Tyrosine-protein kinase receptor FLT3	FLT3	P36888	pubchem
Luhui (Aloe vera)	MOL000098	quercetin	Tyrosine-protein kinase receptor FLT3	FLT3	P36888	pubchem
Huanglian (Coptidis Rhizoma)	MOL000098	quercetin	Tyrosine-protein kinase receptor FLT3	FLT3	P36888	pubchem
Hongqu (red yeast rice)	MOL000098	quercetin	Tyrosine-protein kinase receptor FLT3	FLT3	P36888	pubchem
Luhui (Aloe vera)	MOL001439	arachidonic acid	Glucose-6-phosphate 1-dehydrogenase	G6PD	P11413	pubchem
Danshen (Radix Salviae)	MOL000006	luteolin	glucosidase alpha, acid	GAA	P10253	pubchem
Danshen (Radix Salviae)	MOL002776	Baicalin	GABA-A receptor; alpha-3/beta-3/gamma-2	GABRA1	P14867	pubchem
Danshen (Radix Salviae)	MOL002776	Baicalin	GABA A receptor alpha-2/beta-2/gamma-2	GABRA2	P47869	pubchem
Danshen (Radix Salviae)	MOL002776	Baicalin	GABA-A receptor; alpha-3/beta-3/gamma-2	GABRA3	P34903	pubchem
Danshen (Radix Salviae)	MOL002776	Baicalin	gamma-aminobutyric acid type A receptor alpha4 subunit	GABRA4	P48169	pubchem
Danshen (Radix Salviae)	MOL007122	Miltirone	gamma-aminobutyric acid type A receptor alpha4 subunit (cattle)	GABRA4	P20237	pubchem
Danshen (Radix Salviae)	MOL002776	Baicalin	GABA-A receptor; alpha-3/beta-3/gamma-2	GABRA5	P31644	pubchem
Danshen (Radix Salviae)	MOL002776	Baicalin	gamma-aminobutyric acid type A receptor alpha6 subunit	GABRA6	Q16445	pubchem
Danshen (Radix Salviae)	MOL002776	Baicalin	gamma-aminobutyric acid type A receptor beta1 subunit	GABRB1	P18505	pubchem
Danshen (Radix Salviae)	MOL002776	Baicalin	GABA-A receptor; alpha-3/beta-3/gamma-2	GABRB2	P47870	pubchem
Danshen (Radix Salviae)	MOL002776	Baicalin	GABA-A receptor; alpha-3/beta-3/gamma-2	GABRB3	P28472	pubchem
Danshen (Radix Salviae)	MOL002776	Baicalin	gamma-aminobutyric acid type A receptor delta subunit	GABRD	O14764	pubchem
Danshen (Radix Salviae)	MOL002776	Baicalin	gamma-aminobutyric acid type A receptor epsilon subunit	GABRE	P78334	pubchem
Danshen (Radix Salviae)	MOL002776	Baicalin	gamma-aminobutyric acid type A receptor gamma1 subunit	GABRG1	Q8N1C3	pubchem
Danshen (Radix Salviae)	MOL002776	Baicalin	GABA-A receptor; alpha-3/beta-3/gamma-2	GABRG2	P18507	pubchem
Danshen (Radix Salviae)	MOL007122	Miltirone	gamma-aminobutyric acid type A receptor gamma2 subunit (cattle)	GABRG2	P22300	pubchem
Danshen (Radix Salviae)	MOL002776	Baicalin	gamma-aminobutyric acid type A receptor gamma3 subunit	GABRG3	Q99928	pubchem
Danshen (Radix Salviae)	MOL002776	Baicalin	gamma-aminobutyric acid type A receptor pi subunit	GABRP	O00591	pubchem
Danshen (Radix Salviae)	MOL002776	Baicalin	gamma-aminobutyric acid type A receptor theta subunit	GABRQ	Q9UN88	pubchem
Danshen (Radix Salviae)	MOL000006	luteolin	galactokinase 1	GALK1	P51570	pubchem
Luhui (Aloe vera)	MOL000098	quercetin	galactokinase 1	GALK1	P51570	pubchem
Huanglian (Coptidis Rhizoma)	MOL000098	quercetin	galactokinase 1	GALK1	P51570	pubchem
Hongqu (red yeast rice)	MOL000098	quercetin	galactokinase 1	GALK1	P51570	pubchem
Huanglian (Coptidis Rhizoma)	MOL001454	berberine	glyceraldehyde-3-phosphate dehydrogenase	GAPDH	P04406	pubchem
Danshen (Radix Salviae)	MOL007101	dihydrotanshinoneⅠ	glyceraldehyde-3-phosphate dehydrogenase	GAPDH	P04406	pubchem
Huanglian (Coptidis Rhizoma)	MOL002897	epiberberine	glyceraldehyde-3-phosphate dehydrogenase	GAPDH	P04406	pubchem
Danshen (Radix Salviae)	MOL007156	tanshinone Ⅵ	glyceraldehyde-3-phosphate dehydrogenase	GAPDH	P04406	pubchem
Danshen (Radix Salviae)	MOL007154	tanshinone iia	glyceraldehyde-3-phosphate dehydrogenase	GAPDH	P04406	pubchem
Zhimu (Anemarrhenae Rhizoma)	MOL000422	kaempferol	glucosylceramidase beta	GBA	P04062	pubchem
Danshen (Radix Salviae)	MOL000006	luteolin	glucosylceramidase beta	GBA	P04062	pubchem
Luhui (Aloe vera)	MOL000098	quercetin	glucosylceramidase beta	GBA	P04062	pubchem
Huanglian (Coptidis Rhizoma)	MOL000098	quercetin	glucosylceramidase beta	GBA	P04062	pubchem
Hongqu (red yeast rice)	MOL000098	quercetin	glucosylceramidase beta	GBA	P04062	pubchem
Luhui (Aloe vera)	MOL000098	quercetin	Hexokinase type IV	GCK	P35557	pubchem
Huanglian (Coptidis Rhizoma)	MOL000098	quercetin	Hexokinase type IV	GCK	P35557	pubchem
Hongqu (red yeast rice)	MOL000098	quercetin	Hexokinase type IV	GCK	P35557	pubchem
Luhui (Aloe vera)	MOL002773	beta-carotene	Glial fibrillary acidic protein	GFAP	P14136	pubchem
Luhui (Aloe vera)	MOL001439	arachidonic acid	growth factor, augmenter of liver regeneration	GFER	P55789	pubchem
Danshen (Radix Salviae)	MOL000006	luteolin	growth factor, augmenter of liver regeneration	GFER	P55789	pubchem
Luhui (Aloe vera)	MOL002773	beta-carotene	Gap junction alpha-1 protein	GJA1	P17302	pubchem
Danshen (Radix Salviae)	MOL000006	luteolin	galactosidase alpha	GLA	P06280	pubchem
Luhui (Aloe vera)	MOL001439	arachidonic acid	Beta-galactosidase	GLB1	P16278	pubchem
Danshen (Radix Salviae)	MOL007077	sclareol	GLI family zinc finger 3	GLI3	P10071	pubchem
Zhimu (Anemarrhenae Rhizoma)	MOL000422	kaempferol	GLI family zinc finger 3	GLI3	P10071	pubchem
Luhui (Aloe vera)	MOL000098	quercetin	GLI family zinc finger 3	GLI3	P10071	pubchem
Huanglian (Coptidis Rhizoma)	MOL000098	quercetin	GLI family zinc finger 3	GLI3	P10071	pubchem
Hongqu (red yeast rice)	MOL000098	quercetin	GLI family zinc finger 3	GLI3	P10071	pubchem
Zhimu (Anemarrhenae Rhizoma)	MOL000422	kaempferol	glyoxalase I	GLO1	Q04760	pubchem
Danshen (Radix Salviae)	MOL000006	luteolin	glyoxalase I	GLO1	Q04760	pubchem
Luhui (Aloe vera)	MOL000098	quercetin	glyoxalase I	GLO1	Q04760	pubchem
Huanglian (Coptidis Rhizoma)	MOL000098	quercetin	glyoxalase I	GLO1	Q04760	pubchem
Hongqu (red yeast rice)	MOL000098	quercetin	glyoxalase I	GLO1	Q04760	pubchem
Danshen (Radix Salviae)	MOL000006	luteolin	glutaminase	GLS	O94925	pubchem
Luhui (Aloe vera)	MOL000098	quercetin	glutaminase	GLS	O94925	pubchem
Huanglian (Coptidis Rhizoma)	MOL000098	quercetin	glutaminase	GLS	O94925	pubchem
Hongqu (red yeast rice)	MOL000098	quercetin	glutaminase	GLS	O94925	pubchem
Danshen (Radix Salviae)	MOL007088	cryptotanshinone	geminin DNA replication inhibitor	GMNN	O75496	pubchem
Beiwuweizi (Schisandrae Chinensis Fructus)	MOL008968	Gomisin-A	geminin DNA replication inhibitor	GMNN	O75496	pubchem
Kugua (Momordica charantia)	MOL010267	lycopene	geminin DNA replication inhibitor	GMNN	O75496	pubchem
Danshen (Radix Salviae)	MOL007156	tanshinone Ⅵ	geminin DNA replication inhibitor	GMNN	O75496	pubchem
Danshen (Radix Salviae)	MOL007154	tanshinone iia	geminin DNA replication inhibitor	GMNN	O75496	pubchem
Danshen (Radix Salviae)	MOL001942	isoimperatorin	G protein subunit alpha o1	GNAO1	P09471	pubchem
Huanglian (Coptidis Rhizoma)	MOL002897	epiberberine	G protein subunit alpha o1	GNAO1	P09471	pubchem
Beiwuweizi (Schisandrae Chinensis Fructus)	MOL008968	Gomisin-A	G protein subunit alpha o1	GNAO1	P09471	pubchem
Danshen (Radix Salviae)	MOL000006	luteolin	G protein subunit alpha o1	GNAO1	P09471	pubchem
Danshen (Radix Salviae)	MOL007156	tanshinone Ⅵ	G protein subunit alpha o1	GNAO1	P09471	pubchem
Danshen (Radix Salviae)	MOL007154	tanshinone iia	G protein subunit alpha o1	GNAO1	P09471	pubchem
Huanglian (Coptidis Rhizoma)	MOL002897	epiberberine	GNAS complex locus	GNAS	P63092	pubchem
Danshen (Radix Salviae)	MOL007156	tanshinone Ⅵ	GNAS complex locus	GNAS	P63092	pubchem
Danshen (Radix Salviae)	MOL007154	tanshinone iia	GNAS complex locus	GNAS	P63092	pubchem
Danshen (Radix Salviae)	MOL000006	luteolin	G protein-coupled receptor 35	GPR35	Q9HC97	pubchem
Luhui (Aloe vera)	MOL000098	quercetin	G protein	GPR35	Q9HC97	pubchem
Huanglian (Coptidis Rhizoma)	MOL000098	quercetin	G protein	GPR35	Q9HC97	pubchem
Hongqu (red yeast rice)	MOL000098	quercetin	G protein	GPR35	Q9HC97	pubchem
Zhimu (Anemarrhenae Rhizoma)	MOL000422	kaempferol	Glycogen synthase kinase-3 alpha	GSK3A	P49840	pubchem
Danshen (Radix Salviae)	MOL000006	luteolin	Glycogen synthase kinase-3 alpha	GSK3A	P49840	pubchem
Luhui (Aloe vera)	MOL000098	quercetin	Glycogen synthase kinase-3 alpha	GSK3A	P49840	pubchem
Huanglian (Coptidis Rhizoma)	MOL000098	quercetin	Glycogen synthase kinase-3 alpha	GSK3A	P49840	pubchem
Hongqu (red yeast rice)	MOL000098	quercetin	Glycogen synthase kinase-3 alpha	GSK3A	P49840	pubchem
Huanglian (Coptidis Rhizoma)	MOL000358	beta-sitosterol	Glycogen synthase kinase-3 beta	GSK3B	P49841	pubchem
Hongqu (red yeast rice)	MOL001525	Daucosterol	Glycogen synthase kinase-3 beta	GSK3B	P49841	pubchem
Zhimu (Anemarrhenae Rhizoma)	MOL000422	kaempferol	Glycogen synthase kinase-3 beta	GSK3B	P49841	pubchem
Danshen (Radix Salviae)	MOL000006	luteolin	Glycogen synthase kinase-3 beta	GSK3B	P49841	pubchem
Luhui (Aloe vera)	MOL000098	quercetin	Glycogen synthase kinase-3 beta	GSK3B	P49841	pubchem
Huanglian (Coptidis Rhizoma)	MOL000098	quercetin	Glycogen synthase kinase-3 beta	GSK3B	P49841	pubchem
Hongqu (red yeast rice)	MOL000098	quercetin	Glycogen synthase kinase-3 beta	GSK3B	P49841	pubchem
Luhui (Aloe vera)	MOL000359	sitosterol	Glycogen synthase kinase-3 beta	GSK3B	P49841	pubchem
Kugua (Momordica charantia)	MOL008569	β-sitosterol-β-d-glucoside	Glycogen synthase kinase-3 beta	GSK3B	P49841	pubchem
Luhui (Aloe vera)	MOL000098	quercetin	glutathione-disulfide reductase	GSR	P00390	pubchem
Huanglian (Coptidis Rhizoma)	MOL000098	quercetin	glutathione-disulfide reductase	GSR	P00390	pubchem
Hongqu (red yeast rice)	MOL000098	quercetin	glutathione-disulfide reductase	GSR	P00390	pubchem
Danshen (Radix Salviae)	MOL007088	cryptotanshinone	glutathione Stransferase omega 1	GSTO1	P78417	pubchem
Huanglian (Coptidis Rhizoma)	MOL002897	epiberberine	glutathione S-transferase omega 1	GSTO1	P78417	pubchem
Danshen (Radix Salviae)	MOL000006	luteolin	glutathione S-transferase omega 1	GSTO1	P78417	pubchem
Luhui (Aloe vera)	MOL000098	quercetin	glucuronidase beta	GUSB	P08236	pubchem
Huanglian (Coptidis Rhizoma)	MOL000098	quercetin	glucuronidase beta	GUSB	P08236	pubchem
Hongqu (red yeast rice)	MOL000098	quercetin	glucuronidase beta	GUSB	P08236	pubchem
Luhui (Aloe vera)	MOL000471	aloe-emodin	hypocretin receptor 1	HCRTR1	O43613	pubchem
Huanglian (Coptidis Rhizoma)	MOL002897	epiberberine	hypocretin receptor 1	HCRTR1	O43613	pubchem
Zhimu (Anemarrhenae Rhizoma)	MOL000422	kaempferol	histone deacetylase 9	HDAC9	Q9UKV0	pubchem
Luhui (Aloe vera)	MOL000098	quercetin	histone deacetylase 9	HDAC9	Q9UKV0	pubchem
Huanglian (Coptidis Rhizoma)	MOL000098	quercetin	histone deacetylase 9	HDAC9	Q9UKV0	pubchem
Hongqu (red yeast rice)	MOL000098	quercetin	histone deacetylase 9	HDAC9	Q9UKV0	pubchem
Luhui (Aloe vera)	MOL001439	arachidonic acid	E3 ISG15--protein ligase HERC5	HERC5	Q9UII4	pubchem
Huanglian (Coptidis Rhizoma)	MOL001454	berberine	hypoxia inducible factor 1 subunit alpha	HIF1A	Q16665	pubchem
Danshen (Radix Salviae)	MOL007088	cryptotanshinone	hypoxia inducible factor 1 subunit alpha	HIF1A	Q16665	pubchem
Danshen (Radix Salviae)	MOL007101	dihydrotanshinoneⅠ	hypoxia inducible factor 1 subunit alpha	HIF1A	Q16665	pubchem
Danshen (Radix Salviae)	MOL007111	Isotanshinone II	hypoxia inducible factor 1 subunit alpha	HIF1A	Q16665	pubchem
Zhimu (Anemarrhenae Rhizoma)	MOL000422	kaempferol	hypoxia inducible factor 1 subunit alpha	HIF1A	Q16665	pubchem
Danshen (Radix Salviae)	MOL000006	luteolin	hypoxia inducible factor 1 subunit alpha	HIF1A	Q16665	pubchem
Huanglian (Coptidis Rhizoma)	MOL000785	palmatine	hypoxia inducible factor 1 subunit alpha	HIF1A	Q16665	pubchem
Luhui (Aloe vera)	MOL000098	quercetin	hypoxia inducible factor 1 subunit alpha	HIF1A	Q16665	pubchem
Huanglian (Coptidis Rhizoma)	MOL000098	quercetin	hypoxia inducible factor 1 subunit alpha	HIF1A	Q16665	pubchem
Hongqu (red yeast rice)	MOL000098	quercetin	hypoxia inducible factor 1 subunit alpha	HIF1A	Q16665	pubchem
Danshen (Radix Salviae)	MOL007077	sclareol	hypoxia inducible factor 1 subunit alpha	HIF1A	Q16665	pubchem
Danshen (Radix Salviae)	MOL007156	tanshinone Ⅵ	hypoxia inducible factor 1 subunit alpha	HIF1A	Q16665	pubchem
Danshen (Radix Salviae)	MOL007154	tanshinone iia	hypoxia inducible factor 1 subunit alpha	HIF1A	Q16665	pubchem
Luhui (Aloe vera)	MOL000098	quercetin	hypoxia inducible factor 1 subunit alpha inhibitor	HIF1AN	Q9NWT6	pubchem
Huanglian (Coptidis Rhizoma)	MOL000098	quercetin	hypoxia inducible factor 1 subunit alpha inhibitor	HIF1AN	Q9NWT6	pubchem
Hongqu (red yeast rice)	MOL000098	quercetin	hypoxia inducible factor 1 subunit alpha inhibitor	HIF1AN	Q9NWT6	pubchem
Luhui (Aloe vera)	MOL002773	beta-carotene	Heme oxygenase 1	HMOX1	P09601	pubchem
Huanglian (Coptidis Rhizoma)	MOL002897	epiberberine	homeobox A9	HOXA9	P31269	pubchem
Luhui (Aloe vera)	MOL001439	arachidonic acid	15-hydroxyprostaglandin dehydrogenase [NAD+]	HPGD	P15428	pubchem
Huanglian (Coptidis Rhizoma)	MOL002897	epiberberine	15-hydroxyprostaglandin dehydrogenase [NAD+]	HPGD	P15428	pubchem
Zhimu (Anemarrhenae Rhizoma)	MOL000422	kaempferol	15-hydroxyprostaglandin dehydrogenase [NAD+]	HPGD	P15428	pubchem
Danshen (Radix Salviae)	MOL000006	luteolin	15-hydroxyprostaglandin dehydrogenase [NAD+]	HPGD	P15428	pubchem
Luhui (Aloe vera)	MOL000098	quercetin	15-hydroxyprostaglandin dehydrogenase [NAD+]	HPGD	P15428	pubchem
Huanglian (Coptidis Rhizoma)	MOL000098	quercetin	15-hydroxyprostaglandin dehydrogenase [NAD+]	HPGD	P15428	pubchem
Hongqu (red yeast rice)	MOL000098	quercetin	15-hydroxyprostaglandin dehydrogenase [NAD+]	HPGD	P15428	pubchem
Danshen (Radix Salviae)	MOL007156	tanshinone Ⅵ	15-hydroxyprostaglandin dehydrogenase [NAD+]	HPGD	P15428	pubchem
Danshen (Radix Salviae)	MOL007154	tanshinone iia	15-hydroxyprostaglandin dehydrogenase [NAD+]	HPGD	P15428	pubchem
Luhui (Aloe vera)	MOL000098	quercetin	11-beta-hydroxysteroid dehydrogenase 1	HSD11B1	P28845	pubchem
Huanglian (Coptidis Rhizoma)	MOL000098	quercetin	11-beta-hydroxysteroid dehydrogenase 1	HSD11B1	P28845	pubchem
Hongqu (red yeast rice)	MOL000098	quercetin	11-beta-hydroxysteroid dehydrogenase 1	HSD11B1	P28845	pubchem
Zhimu (Anemarrhenae Rhizoma)	MOL000422	kaempferol	Estradiol 17-beta-dehydrogenase 1	HSD17B1	P14061	pubchem
Luhui (Aloe vera)	MOL000098	quercetin	Estradiol 17-beta-dehydrogenase 1	HSD17B1	P14061	pubchem
Huanglian (Coptidis Rhizoma)	MOL000098	quercetin	Estradiol 17-beta-dehydrogenase 1	HSD17B1	P14061	pubchem
Hongqu (red yeast rice)	MOL000098	quercetin	Estradiol 17-beta-dehydrogenase 1	HSD17B1	P14061	pubchem
Zhimu (Anemarrhenae Rhizoma)	MOL000422	kaempferol	Estradiol 17-beta-dehydrogenase 2	HSD17B2	P37059	pubchem
Luhui (Aloe vera)	MOL000098	quercetin	Estradiol 17-beta-dehydrogenase 2	HSD17B2	P37059	pubchem
Huanglian (Coptidis Rhizoma)	MOL000098	quercetin	Estradiol 17-beta-dehydrogenase 2	HSD17B2	P37059	pubchem
Hongqu (red yeast rice)	MOL000098	quercetin	Estradiol 17-beta-dehydrogenase 2	HSD17B2	P37059	pubchem
Luhui (Aloe vera)	MOL000098	quercetin	heat shock transcription factor 1	HSF1	Q00613	pubchem
Huanglian (Coptidis Rhizoma)	MOL000098	quercetin	heat shock transcription factor 1	HSF1	Q00613	pubchem
Hongqu (red yeast rice)	MOL000098	quercetin	heat shock transcription factor 1	HSF1	Q00613	pubchem
Luhui (Aloe vera)	MOL000098	quercetin	heat shock protein 90 alpha family class A member 1	HSP90AA1	P07900	pubchem
Huanglian (Coptidis Rhizoma)	MOL000098	quercetin	heat shock protein 90 alpha family class A member 1	HSP90AA1	P07900	pubchem
Hongqu (red yeast rice)	MOL000098	quercetin	heat shock protein 90 alpha family class A member 1	HSP90AA1	P07900	pubchem
Luhui (Aloe vera)	MOL000098	quercetin	heat shock protein 90 alpha family class B member 1	HSP90AB1	P08238	pubchem
Huanglian (Coptidis Rhizoma)	MOL000098	quercetin	heat shock protein 90 alpha family class B member 1	HSP90AB1	P08238	pubchem
Hongqu (red yeast rice)	MOL000098	quercetin	heat shock protein 90 alpha family class B member 1	HSP90AB1	P08238	pubchem
Danshen (Radix Salviae)	MOL000006	luteolin	heat shock 70kDa protein 5 (glucose-regulated protein, 78kDa)	HSPA5	P11021	pubchem
Luhui (Aloe vera)	MOL000098	quercetin	heat shock 70kDa protein 5 (glucose-regulated protein, 78kDa)	HSPA5	P11021	pubchem
Huanglian (Coptidis Rhizoma)	MOL000098	quercetin	heat shock 70kDa protein 5 (glucose-regulated protein, 78kDa)	HSPA5	P11021	pubchem
Hongqu (red yeast rice)	MOL000098	quercetin	heat shock 70kDa protein 5 (glucose-regulated protein, 78kDa)	HSPA5	P11021	pubchem
Zhimu (Anemarrhenae Rhizoma)	MOL000422	kaempferol	heat shock protein family B (small) member 1	HSPB1	P04792	pubchem
Luhui (Aloe vera)	MOL000098	quercetin	heat shock protein family B (small) member 1	HSPB1	P04792	pubchem
Huanglian (Coptidis Rhizoma)	MOL000098	quercetin	heat shock protein family B (small) member 1	HSPB1	P04792	pubchem
Hongqu (red yeast rice)	MOL000098	quercetin	heat shock protein family B (small) member 1	HSPB1	P04792	pubchem
Danshen (Radix Salviae)	MOL007077	sclareol	heat shock protein family B (small) member 1	HSPB1	P04792	pubchem
Huanglian (Coptidis Rhizoma)	MOL002903	(R)-Canadine	Serotonin 1a (5-HT1a) receptor	HTR1A	P08908	pubchem
Luhui (Aloe vera)	MOL000098	quercetin	Serotonin 1a (5-HT1a) receptor	HTR1A	P08908	pubchem
Huanglian (Coptidis Rhizoma)	MOL000098	quercetin	Serotonin 1a (5-HT1a) receptor	HTR1A	P08908	pubchem
Hongqu (red yeast rice)	MOL000098	quercetin	Serotonin 1a (5-HT1a) receptor	HTR1A	P08908	pubchem
Huanglian (Coptidis Rhizoma)	MOL002903	(R)-Canadine	Serotonin 2a (5-HT2a) receptor	HTR2A	P28223	pubchem
Danshen (Radix Salviae)	MOL002776	Baicalin	Serotonin 7 (5-HT7) receptor	HTR7	P34969	pubchem
Zhimu (Anemarrhenae Rhizoma)	MOL000449	Stigmasterol	Serotonin 7 (5-HT7) receptor	HTR7	P34969	pubchem
Hongqu (red yeast rice)	MOL000449	Stigmasterol	Serotonin 7 (5-HT7) receptor	HTR7	P34969	pubchem
Danshen (Radix Salviae)	MOL007156	tanshinone Ⅵ	HTRA1 protein	HTRA1	Q05DJ8	pubchem
Danshen (Radix Salviae)	MOL007154	tanshinone iia	HTRA1 protein	HTRA1	Q05DJ8	pubchem
Huanglian (Coptidis Rhizoma)	MOL001454	berberine	huntingtin	HTT	P42858	pubchem
Zhimu (Anemarrhenae Rhizoma)	MOL000422	kaempferol	huntingtin	HTT	P42858	pubchem
Danshen (Radix Salviae)	MOL000006	luteolin	huntingtin	HTT	P42858	pubchem
Kugua (Momordica charantia)	MOL010267	lycopene	huntingtin	HTT	P42858	pubchem
Huanglian (Coptidis Rhizoma)	MOL000358	beta-sitosterol	isocitrate dehydrogenase (NADP(+)) 1, cytosolic	IDH1	O75874	pubchem
Hongqu (red yeast rice)	MOL001525	Daucosterol	isocitrate dehydrogenase (NADP(+)) 1, cytosolic	IDH1	O75874	pubchem
Zhimu (Anemarrhenae Rhizoma)	MOL000422	kaempferol	isocitrate dehydrogenase (NADP(+)) 1, cytosolic	IDH1	O75874	pubchem
Danshen (Radix Salviae)	MOL000006	luteolin	isocitrate dehydrogenase (NADP(+)) 1, cytosolic	IDH1	O75874	pubchem
Zhimu (Anemarrhenae Rhizoma)	MOL000449	Stigmasterol	isocitrate dehydrogenase (NADP(+)) 1, cytosolic	IDH1	O75874	pubchem
Hongqu (red yeast rice)	MOL000449	Stigmasterol	isocitrate dehydrogenase (NADP(+)) 1, cytosolic	IDH1	O75874	pubchem
Kugua (Momordica charantia)	MOL008569	β-sitosterol-β-d-glucoside	isocitrate dehydrogenase (NADP(+)) 1, cytosolic	IDH1	O75874	pubchem
Luhui (Aloe vera)	MOL000471	aloe-emodin	interferon gamma	IFNG	P01579	pubchem
Luhui (Aloe vera)	MOL000098	quercetin	interferon gamma	IFNG	P01579	pubchem
Huanglian (Coptidis Rhizoma)	MOL000098	quercetin	interferon gamma	IFNG	P01579	pubchem
Hongqu (red yeast rice)	MOL000098	quercetin	interferon gamma	IFNG	P01579	pubchem
Luhui (Aloe vera)	MOL000098	quercetin	insulin like growth factor 1 receptor	IGF1R	P08069	pubchem
Huanglian (Coptidis Rhizoma)	MOL000098	quercetin	insulin like growth factor 1 receptor	IGF1R	P08069	pubchem
Hongqu (red yeast rice)	MOL000098	quercetin	insulin like growth factor 1 receptor	IGF1R	P08069	pubchem
Luhui (Aloe vera)	MOL000471	aloe-emodin	Interleukin-1 beta	IL1B	P01584	pubchem
Luhui (Aloe vera)	MOL000098	quercetin	Tyrosine-protein kinase JAK1	JAK1	P23458	pubchem
Huanglian (Coptidis Rhizoma)	MOL000098	quercetin	Tyrosine-protein kinase JAK1	JAK1	P23458	pubchem
Hongqu (red yeast rice)	MOL000098	quercetin	Tyrosine-protein kinase JAK1	JAK1	P23458	pubchem
Huanglian (Coptidis Rhizoma)	MOL002897	epiberberine	Janus kinase 2	JAK2	O60674	pubchem
Luhui (Aloe vera)	MOL002773	beta-carotene	Transcription factor AP-1	JUN	P05412	pubchem
Luhui (Aloe vera)	MOL000359	sitosterol	Transcription factor AP-1	JUN	P05412	pubchem
Luhui (Aloe vera)	MOL000471	aloe-emodin	Jun proto-oncogene, AP-1 transcription factor subunit	JUN	P05412	pubchem
Zhimu (Anemarrhenae Rhizoma)	MOL000422	kaempferol	Jun proto-oncogene, AP-1 transcription factor subunit	JUN	P05412	pubchem
Luhui (Aloe vera)	MOL000098	quercetin	Jun proto-oncogene, AP-1 transcription factor subunit	JUN	P05412	pubchem
Huanglian (Coptidis Rhizoma)	MOL000098	quercetin	Jun proto-oncogene, AP-1 transcription factor subunit	JUN	P05412	pubchem
Hongqu (red yeast rice)	MOL000098	quercetin	Jun proto-oncogene, AP-1 transcription factor subunit	JUN	P05412	pubchem
Danshen (Radix Salviae)	MOL007077	sclareol	Jun proto-oncogene, AP-1 transcription factor subunit	JUN	P05412	pubchem
Luhui (Aloe vera)	MOL001439	arachidonic acid	lysine acetyltransferase 2A	KAT2A	Q92830	pubchem
Luhui (Aloe vera)	MOL002773	beta-carotene	lysine acetyltransferase 2A	KAT2A	Q92830	pubchem
Danshen (Radix Salviae)	MOL007156	tanshinone Ⅵ	lysine acetyltransferase 2A	KAT2A	Q92830	pubchem
Danshen (Radix Salviae)	MOL007154	tanshinone iia	lysine acetyltransferase 2A	KAT2A	Q92830	pubchem
Luhui (Aloe vera)	MOL002773	beta-carotene	Histone acetyltransferase MYST4	KAT6B	Q8WYB5	pubchem
Huanglian (Coptidis Rhizoma)	MOL001454	berberine	potassium voltage-gated channel subfamily H member 2	KCNH2	Q12809	pubchem
Hongqu (red yeast rice)	MOL001965	Dauricine	potassium voltage-gated channel subfamily H member 2	KCNH2	Q12809	pubchem
Hongqu (red yeast rice)	MOL007475	Ginsenoside f2	potassium voltage-gated channel subfamily H member 2	KCNH2	Q12809	pubchem
Zhimu (Anemarrhenae Rhizoma)	MOL000422	kaempferol	potassium voltage-gated channel subfamily H member 2	KCNH2	Q12809	pubchem
Kugua (Momordica charantia)	MOL010267	lycopene	potassium voltage gated channel subfamily H member 2	KCNH2	Q12809	pubchem
Luhui (Aloe vera)	MOL001439	arachidonic acid	potassium voltage-gated channel subfamily J member 4	KCNJ4	P48050	pubchem
Luhui (Aloe vera)	MOL001439	arachidonic acid	Potassium channel subfamily K member 10	KCNK10	P57789	pubchem
Luhui (Aloe vera)	MOL001439	arachidonic acid	potassium two pore domain channel subfamily K member 10	KCNK10	P57789	pubchem
Luhui (Aloe vera)	MOL001439	arachidonic acid	potassium two pore domain channel subfamily K member 18	KCNK18	Q7Z418	pubchem
Luhui (Aloe vera)	MOL001439	arachidonic acid	Potassium channel subfamily K member 2	KCNK2	O95069	pubchem
Luhui (Aloe vera)	MOL001439	arachidonic acid	potassium two pore domain channel subfamily K member 2	KCNK2	O95069	pubchem
Luhui (Aloe vera)	MOL001439	arachidonic acid	potassium two pore domain channel subfamily K member 3	KCNK3	O14649	pubchem
Danshen (Radix Salviae)	MOL007088	cryptotanshinone	potassium two pore domain channel subfamily K member 3	KCNK3	O14649	pubchem
Luhui (Aloe vera)	MOL001439	arachidonic acid	potassium two pore domain channel subfamily K member 4	KCNK4	Q9NYG8	pubchem
Zhimu (Anemarrhenae Rhizoma)	MOL000422	kaempferol	potassium calcium-activated channel subfamily M alpha 1	KCNMA1	Q12791	pubchem
Luhui (Aloe vera)	MOL000098	quercetin	Vascular endothelial growth factor receptor 2	KDR	P35968	pubchem
Huanglian (Coptidis Rhizoma)	MOL000098	quercetin	Vascular endothelial growth factor receptor 2	KDR	P35968	pubchem
Hongqu (red yeast rice)	MOL000098	quercetin	Vascular endothelial growth factor receptor 2	KDR	P35968	pubchem
Luhui (Aloe vera)	MOL000471	aloe-emodin	lysine methyltransferase 2A	KMT2A	Q03164	pubchem
Huanglian (Coptidis Rhizoma)	MOL001454	berberine	lysine methyltransferase 2A	KMT2A	Q03164	pubchem
Huanglian (Coptidis Rhizoma)	MOL002897	epiberberine	lysine methyltransferase 2A	KMT2A	Q03164	pubchem
Zhimu (Anemarrhenae Rhizoma)	MOL000422	kaempferol	lysine methyltransferase 2A	KMT2A	Q03164	pubchem
Danshen (Radix Salviae)	MOL000006	luteolin	lysine methyltransferase 2A	KMT2A	Q03164	pubchem
Luhui (Aloe vera)	MOL000098	quercetin	lysine methyltransferase 2A	KMT2A	Q03164	pubchem
Huanglian (Coptidis Rhizoma)	MOL000098	quercetin	lysine methyltransferase 2A	KMT2A	Q03164	pubchem
Hongqu (red yeast rice)	MOL000098	quercetin	lysine methyltransferase 2A	KMT2A	Q03164	pubchem
Danshen (Radix Salviae)	MOL007156	tanshinone Ⅵ	lysine methyltransferase 2A	KMT2A	Q03164	pubchem
Danshen (Radix Salviae)	MOL007154	tanshinone iia	lysine methyltransferase 2A	KMT2A	Q03164	pubchem
Luhui (Aloe vera)	MOL000471	aloe-emodin	karyopherin subunit beta 1	KPNB1	Q14974	pubchem
Huanglian (Coptidis Rhizoma)	MOL002897	epiberberine	karyopherin subunit beta 1	KPNB1	Q14974	pubchem
Zhimu (Anemarrhenae Rhizoma)	MOL000422	kaempferol	karyopherin subunit beta 1	KPNB1	Q14974	pubchem
Danshen (Radix Salviae)	MOL000006	luteolin	karyopherin subunit beta 1	KPNB1	Q14974	pubchem
Danshen (Radix Salviae)	MOL007156	tanshinone Ⅵ	L3MBTL histone methyl-lysine binding protein 1	L3MBTL1	Q9Y468	pubchem
Danshen (Radix Salviae)	MOL007154	tanshinone iia	L3MBTL histone methyl-lysine binding protein 1	L3MBTL1	Q9Y468	pubchem
Danshen (Radix Salviae)	MOL000006	luteolin	LCK proto-oncogene, Src family tyrosine kinase	LCK	P06239	pubchem
Luhui (Aloe vera)	MOL000098	quercetin	LCK proto-oncogene, Src family tyrosine kinase	LCK	P06239	pubchem
Huanglian (Coptidis Rhizoma)	MOL000098	quercetin	LCK proto-oncogene, Src family tyrosine kinase	LCK	P06239	pubchem
Hongqu (red yeast rice)	MOL000098	quercetin	LCK proto-oncogene, Src family tyrosine kinase	LCK	P06239	pubchem
Huanglian (Coptidis Rhizoma)	MOL002903	(R)-Canadine	lamin A/C	LMNA	P02545	pubchem
Huanglian (Coptidis Rhizoma)	MOL001454	berberine	lamin A/C	LMNA	P02545	pubchem
Luhui (Aloe vera)	MOL002773	beta-carotene	lamin A/C	LMNA	P02545	pubchem
Huanglian (Coptidis Rhizoma)	MOL002897	epiberberine	lamin A/C	LMNA	P02545	pubchem
Danshen (Radix Salviae)	MOL001942	isoimperatorin	lamin A/C	LMNA	P02545	pubchem
Zhimu (Anemarrhenae Rhizoma)	MOL000422	kaempferol	lamin A/C	LMNA	P02545	pubchem
Danshen (Radix Salviae)	MOL000006	luteolin	lamin A/C	LMNA	P02545	pubchem
Kugua (Momordica charantia)	MOL010267	lycopene	lamin A/C	LMNA	P02545	pubchem
Huanglian (Coptidis Rhizoma)	MOL000785	palmatine	lamin A/C	LMNA	P02545	pubchem
Luhui (Aloe vera)	MOL000098	quercetin	lamin A/C	LMNA	P02545	pubchem
Huanglian (Coptidis Rhizoma)	MOL000098	quercetin	lamin A/C	LMNA	P02545	pubchem
Hongqu (red yeast rice)	MOL000098	quercetin	lamin A/C	LMNA	P02545	pubchem
Danshen (Radix Salviae)	MOL007156	tanshinone Ⅵ	lamin A/C	LMNA	P02545	pubchem
Danshen (Radix Salviae)	MOL007154	tanshinone iia	lamin A/C	LMNA	P02545	pubchem
Danshen (Radix Salviae)	MOL000006	luteolin	lipoxygenase (soybean)	LOX1.1	P08170	pubchem
Danshen (Radix Salviae)	MOL007088	cryptotanshinone	lysophospholipase II	LYPLA2	O95372	pubchem
Danshen (Radix Salviae)	MOL007156	tanshinone Ⅵ	lysophospholipase II	LYPLA2	O95372	pubchem
Danshen (Radix Salviae)	MOL007154	tanshinone iia	lysophospholipase II	LYPLA2	O95372	pubchem
Danshen (Radix Salviae)	MOL000006	luteolin	Monoamine oxidase A	MAOA	P21397	pubchem
Luhui (Aloe vera)	MOL000098	quercetin	Monoamine oxidase A	MAOA	P21397	pubchem
Huanglian (Coptidis Rhizoma)	MOL000098	quercetin	Monoamine oxidase A	MAOA	P21397	pubchem
Hongqu (red yeast rice)	MOL000098	quercetin	Monoamine oxidase A	MAOA	P21397	pubchem
Danshen (Radix Salviae)	MOL000006	luteolin	Monoamine oxidase B	MAOB	P27338	pubchem
Luhui (Aloe vera)	MOL000098	quercetin	Monoamine oxidase B	MAOB	P27338	pubchem
Huanglian (Coptidis Rhizoma)	MOL000098	quercetin	Monoamine oxidase B	MAOB	P27338	pubchem
Hongqu (red yeast rice)	MOL000098	quercetin	Monoamine oxidase B	MAOB	P27338	pubchem
Luhui (Aloe vera)	MOL000359	sitosterol	Microtubule-associated protein 2	MAP2	P11137	pubchem
Luhui (Aloe vera)	MOL000098	quercetin	mitogen-activated protein kinase kinase 1	MAP2K1	Q02750	pubchem
Huanglian (Coptidis Rhizoma)	MOL000098	quercetin	mitogen-activated protein kinase kinase 1	MAP2K1	Q02750	pubchem
Hongqu (red yeast rice)	MOL000098	quercetin	mitogen-activated protein kinase kinase 1	MAP2K1	Q02750	pubchem
Luhui (Aloe vera)	MOL000098	quercetin	Dual specificity mitogen-activated protein kinase kinase 2	MAP2K2	P36507	pubchem
Huanglian (Coptidis Rhizoma)	MOL000098	quercetin	Dual specificity mitogen-activated protein kinase kinase 2	MAP2K2	P36507	pubchem
Hongqu (red yeast rice)	MOL000098	quercetin	Dual specificity mitogen-activated protein kinase kinase 2	MAP2K2	P36507	pubchem
Luhui (Aloe vera)	MOL000098	quercetin	mitogen-activated protein kinase kinase 6	MAP2K6	P52564	pubchem
Huanglian (Coptidis Rhizoma)	MOL000098	quercetin	mitogen-activated protein kinase kinase 6	MAP2K6	P52564	pubchem
Hongqu (red yeast rice)	MOL000098	quercetin	mitogen-activated protein kinase kinase 6	MAP2K6	P52564	pubchem
Luhui (Aloe vera)	MOL000098	quercetin	mitogen-activated protein kinase kinase kinase 5	MAP3K5	Q99683	pubchem
Huanglian (Coptidis Rhizoma)	MOL000098	quercetin	mitogen-activated protein kinase kinase kinase 5	MAP3K5	Q99683	pubchem
Hongqu (red yeast rice)	MOL000098	quercetin	mitogen-activated protein kinase kinase kinase 5	MAP3K5	Q99683	pubchem
Luhui (Aloe vera)	MOL001439	arachidonic acid	MAP kinase ERK2	MAPK1	P28482	pubchem
Danshen (Radix Salviae)	MOL007101	dihydrotanshinoneⅠ	MAP kinase ERK2	MAPK1	P28482	pubchem
Zhimu (Anemarrhenae Rhizoma)	MOL000422	kaempferol	MAP kinase ERK2	MAPK1	P28482	pubchem
Danshen (Radix Salviae)	MOL007122	Miltirone	MAP kinase ERK2	MAPK1	P28482	pubchem
Luhui (Aloe vera)	MOL000098	quercetin	MAP kinase ERK2	MAPK1	P28482	pubchem
Huanglian (Coptidis Rhizoma)	MOL000098	quercetin	MAP kinase ERK2	MAPK1	P28482	pubchem
Hongqu (red yeast rice)	MOL000098	quercetin	MAP kinase ERK2	MAPK1	P28482	pubchem
Danshen (Radix Salviae)	MOL007156	tanshinone Ⅵ	MAP kinase ERK2	MAPK1	P28482	pubchem
Danshen (Radix Salviae)	MOL007154	tanshinone iia	MAP kinase ERK2	MAPK1	P28482	pubchem
Danshen (Radix Salviae)	MOL007101	dihydrotanshinoneⅠ	mitogen-activated protein kinase 11	MAPK11	Q15759	pubchem
Danshen (Radix Salviae)	MOL007122	Miltirone	mitogen-activated protein kinase 11	MAPK11	Q15759	pubchem
Luhui (Aloe vera)	MOL000098	quercetin	mitogen-activated protein kinase 11	MAPK11	Q15759	pubchem
Huanglian (Coptidis Rhizoma)	MOL000098	quercetin	mitogen-activated protein kinase 11	MAPK11	Q15759	pubchem
Hongqu (red yeast rice)	MOL000098	quercetin	mitogen-activated protein kinase 11	MAPK11	Q15759	pubchem
Danshen (Radix Salviae)	MOL007101	dihydrotanshinoneⅠ	mitogen-activated protein kinase 12	MAPK12	P53778	pubchem
Danshen (Radix Salviae)	MOL007122	Miltirone	mitogen-activated protein kinase 12	MAPK12	P53778	pubchem
Luhui (Aloe vera)	MOL000098	quercetin	mitogen-activated protein kinase 12	MAPK12	P53778	pubchem
Huanglian (Coptidis Rhizoma)	MOL000098	quercetin	mitogen-activated protein kinase 12	MAPK12	P53778	pubchem
Hongqu (red yeast rice)	MOL000098	quercetin	mitogen-activated protein kinase 12	MAPK12	P53778	pubchem
Danshen (Radix Salviae)	MOL007101	dihydrotanshinoneⅠ	mitogen-activated protein kinase 13	MAPK13	O15264	pubchem
Danshen (Radix Salviae)	MOL007122	Miltirone	mitogen-activated protein kinase 13	MAPK13	O15264	pubchem
Luhui (Aloe vera)	MOL000098	quercetin	mitogen-activated protein kinase 13	MAPK13	O15264	pubchem
Huanglian (Coptidis Rhizoma)	MOL000098	quercetin	mitogen-activated protein kinase 13	MAPK13	O15264	pubchem
Hongqu (red yeast rice)	MOL000098	quercetin	mitogen-activated protein kinase 13	MAPK13	O15264	pubchem
Danshen (Radix Salviae)	MOL007101	dihydrotanshinoneⅠ	mitogen-activated protein kinase 14	MAPK14	Q16539	pubchem
Danshen (Radix Salviae)	MOL007122	Miltirone	mitogen-activated protein kinase 14	MAPK14	Q16539	pubchem
Luhui (Aloe vera)	MOL000098	quercetin	mitogen-activated protein kinase 14	MAPK14	Q16539	pubchem
Huanglian (Coptidis Rhizoma)	MOL000098	quercetin	mitogen-activated protein kinase 14	MAPK14	Q16539	pubchem
Hongqu (red yeast rice)	MOL000098	quercetin	mitogen-activated protein kinase 14	MAPK14	Q16539	pubchem
Danshen (Radix Salviae)	MOL007101	dihydrotanshinoneⅠ	MAP kinase ERK1	MAPK3	P27361	pubchem
Danshen (Radix Salviae)	MOL007122	Miltirone	MAP kinase ERK1	MAPK3	P27361	pubchem
Luhui (Aloe vera)	MOL000098	quercetin	MAP kinase ERK1	MAPK3	P27361	pubchem
Huanglian (Coptidis Rhizoma)	MOL000098	quercetin	MAP kinase ERK1	MAPK3	P27361	pubchem
Hongqu (red yeast rice)	MOL000098	quercetin	MAP kinase ERK1	MAPK3	P27361	pubchem
Luhui (Aloe vera)	MOL000098	quercetin	mitogen-activated protein kinase 6	MAPK6	Q16659	pubchem
Huanglian (Coptidis Rhizoma)	MOL000098	quercetin	mitogen-activated protein kinase 6	MAPK6	Q16659	pubchem
Hongqu (red yeast rice)	MOL000098	quercetin	mitogen-activated protein kinase 6	MAPK6	Q16659	pubchem
Luhui (Aloe vera)	MOL000098	quercetin	c-Jun N-terminal kinase 1	MAPK8	P45983	pubchem
Huanglian (Coptidis Rhizoma)	MOL000098	quercetin	c-Jun N-terminal kinase 1	MAPK8	P45983	pubchem
Hongqu (red yeast rice)	MOL000098	quercetin	c-Jun N-terminal kinase 1	MAPK8	P45983	pubchem
Luhui (Aloe vera)	MOL000098	quercetin	c-Jun N-terminal kinase 2	MAPK9	P45984	pubchem
Huanglian (Coptidis Rhizoma)	MOL000098	quercetin	c-Jun N-terminal kinase 2	MAPK9	P45984	pubchem
Hongqu (red yeast rice)	MOL000098	quercetin	c-Jun N-terminal kinase 2	MAPK9	P45984	pubchem
Luhui (Aloe vera)	MOL000098	quercetin	MAP kinase-activated protein kinase 2	MAPKAPK2	P49137	pubchem
Huanglian (Coptidis Rhizoma)	MOL000098	quercetin	MAP kinase-activated protein kinase 2	MAPKAPK2	P49137	pubchem
Hongqu (red yeast rice)	MOL000098	quercetin	MAP kinase-activated protein kinase 2	MAPKAPK2	P49137	pubchem
Luhui (Aloe vera)	MOL000098	quercetin	mitogen-activated protein kinase-activated protein kinase 5	MAPKAPK5	Q8IW41	pubchem
Huanglian (Coptidis Rhizoma)	MOL000098	quercetin	mitogen-activated protein kinase-activated protein kinase 5	MAPKAPK5	Q8IW41	pubchem
Hongqu (red yeast rice)	MOL000098	quercetin	mitogen-activated protein kinase-activated protein kinase 5	MAPKAPK5	Q8IW41	pubchem
Danshen (Radix Salviae)	MOL007156	tanshinone Ⅵ	microtubule associated protein tau	MAPT	P10636	pubchem
Danshen (Radix Salviae)	MOL007154	tanshinone iia	microtubule associated protein tau	MAPT	P10636	pubchem
Luhui (Aloe vera)	MOL001439	arachidonic acid	microtubule associated protein tau	MAPT	P10636	pubchem
Huanglian (Coptidis Rhizoma)	MOL001454	berberine	microtubule associated protein tau	MAPT	P10636	pubchem
Danshen (Radix Salviae)	MOL007088	cryptotanshinone	microtubule associated protein tau	MAPT	P10636	pubchem
Huanglian (Coptidis Rhizoma)	MOL002897	epiberberine	microtubule associated protein tau	MAPT	P10636	pubchem
Zhimu (Anemarrhenae Rhizoma)	MOL000422	kaempferol	microtubule associated protein tau	MAPT	P10636	pubchem
Danshen (Radix Salviae)	MOL000006	luteolin	microtubule associated protein tau	MAPT	P10636	pubchem
Luhui (Aloe vera)	MOL000098	quercetin	microtubule associated protein tau	MAPT	P10636	pubchem
Huanglian (Coptidis Rhizoma)	MOL000098	quercetin	microtubule associated protein tau	MAPT	P10636	pubchem
Hongqu (red yeast rice)	MOL000098	quercetin	microtubule associated protein tau	MAPT	P10636	pubchem
Huanglian (Coptidis Rhizoma)	MOL002897	epiberberine	muscleblind like splicing regulator 1	MBNL1	Q9NR56	pubchem
Danshen (Radix Salviae)	MOL000006	luteolin	muscleblind like splicing regulator 1	MBNL1	Q9NR56	pubchem
Luhui (Aloe vera)	MOL000098	quercetin	muscleblind like splicing regulator 1	MBNL1	Q9NR56	pubchem
Huanglian (Coptidis Rhizoma)	MOL000098	quercetin	muscleblind like splicing regulator 1	MBNL1	Q9NR56	pubchem
Hongqu (red yeast rice)	MOL000098	quercetin	muscleblind like splicing regulator 1	MBNL1	Q9NR56	pubchem
Danshen (Radix Salviae)	MOL007156	tanshinone Ⅵ	muscleblind like splicing regulator 1	MBNL1	Q9NR56	pubchem
Danshen (Radix Salviae)	MOL007154	tanshinone iia	muscleblind like splicing regulator 1	MBNL1	Q9NR56	pubchem
Luhui (Aloe vera)	MOL000471	aloe-emodin	MCL1 apoptosis regulator, BCL2 family member	MCL1	Q07820	pubchem
Huanglian (Coptidis Rhizoma)	MOL002897	epiberberine	MCL1 apoptosis regulator, BCL2 family member	MCL1	Q07820	pubchem
Danshen (Radix Salviae)	MOL000006	luteolin	MCL1 apoptosis regulator, BCL2 family member	MCL1	Q07820	pubchem
Danshen (Radix Salviae)	MOL007156	tanshinone Ⅵ	MDM2 proto-oncogene	MDM2	Q00987	pubchem
Danshen (Radix Salviae)	MOL007154	tanshinone iia	MDM2 proto-oncogene	MDM2	Q00987	pubchem
Danshen (Radix Salviae)	MOL007156	tanshinone Ⅵ	MDM4 regulator of p53	MDM4	O15151	pubchem
Danshen (Radix Salviae)	MOL007154	tanshinone iia	MDM4 regulator of p53	MDM4	O15151	pubchem
Luhui (Aloe vera)	MOL000471	aloe-emodin	menin 1	MEN1	O00255	pubchem
Huanglian (Coptidis Rhizoma)	MOL001454	berberine	menin 1	MEN1	O00255	pubchem
Huanglian (Coptidis Rhizoma)	MOL002897	epiberberine	menin 1	MEN1	O00255	pubchem
Zhimu (Anemarrhenae Rhizoma)	MOL000422	kaempferol	menin 1	MEN1	O00255	pubchem
Danshen (Radix Salviae)	MOL000006	luteolin	menin 1	MEN1	O00255	pubchem
Luhui (Aloe vera)	MOL000098	quercetin	menin 1	MEN1	O00255	pubchem
Huanglian (Coptidis Rhizoma)	MOL000098	quercetin	menin 1	MEN1	O00255	pubchem
Hongqu (red yeast rice)	MOL000098	quercetin	menin 1	MEN1	O00255	pubchem
Danshen (Radix Salviae)	MOL007156	tanshinone Ⅵ	menin 1	MEN1	O00255	pubchem
Danshen (Radix Salviae)	MOL007154	tanshinone iia	menin 1	MEN1	O00255	pubchem
Luhui (Aloe vera)	MOL000098	quercetin	Hepatocyte growth factor receptor	MET	P08581	pubchem
Huanglian (Coptidis Rhizoma)	MOL000098	quercetin	Hepatocyte growth factor receptor	MET	P08581	pubchem
Hongqu (red yeast rice)	MOL000098	quercetin	Hepatocyte growth factor receptor	MET	P08581	pubchem
Huanglian (Coptidis Rhizoma)	MOL002894	berberrubine	monoglyceride lipase	MGLL	Q99685	pubchem
Danshen (Radix Salviae)	MOL007156	tanshinone Ⅵ	monoglyceride lipase	MGLL	Q99685	pubchem
Danshen (Radix Salviae)	MOL007154	tanshinone iia	monoglyceride lipase	MGLL	Q99685	pubchem
Danshen (Radix Salviae)	MOL007107	C09092	melanocyte inducing transcription factor	MITF	O75030	pubchem
Danshen (Radix Salviae)	MOL007088	cryptotanshinone	melanocyte inducing transcription factor	MITF	O75030	pubchem
Danshen (Radix Salviae)	MOL007156	tanshinone Ⅵ	melanocyte inducing transcription factor	MITF	O75030	pubchem
Danshen (Radix Salviae)	MOL007154	tanshinone iia	melanocyte inducing transcription factor	MITF	O75030	pubchem
Luhui (Aloe vera)	MOL002773	beta-carotene	Interstitial collagenase	MMP1	P03956	pubchem
Danshen (Radix Salviae)	MOL000006	luteolin	matrix metallopeptidase 1	MMP1	P03956	pubchem
Luhui (Aloe vera)	MOL000098	quercetin	matrix metallopeptidase 1	MMP1	P03956	pubchem
Huanglian (Coptidis Rhizoma)	MOL000098	quercetin	matrix metallopeptidase 1	MMP1	P03956	pubchem
Hongqu (red yeast rice)	MOL000098	quercetin	matrix metallopeptidase 1	MMP1	P03956	pubchem
Luhui (Aloe vera)	MOL002773	beta-carotene	Stromelysin-2	MMP10	P09238	pubchem
Danshen (Radix Salviae)	MOL000006	luteolin	Matrix metalloproteinase 12	MMP12	P39900	pubchem
Luhui (Aloe vera)	MOL000098	quercetin	Matrix metalloproteinase 12	MMP12	P39900	pubchem
Huanglian (Coptidis Rhizoma)	MOL000098	quercetin	Matrix metalloproteinase 12	MMP12	P39900	pubchem
Hongqu (red yeast rice)	MOL000098	quercetin	Matrix metalloproteinase 12	MMP12	P39900	pubchem
Danshen (Radix Salviae)	MOL000006	luteolin	Matrix metalloproteinase 13	MMP13	P45452	pubchem
Luhui (Aloe vera)	MOL000098	quercetin	Matrix metalloproteinase 13	MMP13	P45452	pubchem
Huanglian (Coptidis Rhizoma)	MOL000098	quercetin	Matrix metalloproteinase 13	MMP13	P45452	pubchem
Hongqu (red yeast rice)	MOL000098	quercetin	Matrix metalloproteinase 13	MMP13	P45452	pubchem
Luhui (Aloe vera)	MOL002773	beta-carotene	72 kDa type IV collagenase	MMP2	P08253	pubchem
Danshen (Radix Salviae)	MOL000006	luteolin	Matrix metalloproteinase 2	MMP2	P08253	pubchem
Luhui (Aloe vera)	MOL000098	quercetin	Matrix metalloproteinase 2	MMP2	P08253	pubchem
Huanglian (Coptidis Rhizoma)	MOL000098	quercetin	Matrix metalloproteinase 2	MMP2	P08253	pubchem
Hongqu (red yeast rice)	MOL000098	quercetin	Matrix metalloproteinase 2	MMP2	P08253	pubchem
Danshen (Radix Salviae)	MOL000006	luteolin	Matrix metalloproteinase 3	MMP3	P08254	pubchem
Luhui (Aloe vera)	MOL000098	quercetin	Matrix metalloproteinase 3	MMP3	P08254	pubchem
Huanglian (Coptidis Rhizoma)	MOL000098	quercetin	Matrix metalloproteinase 3	MMP3	P08254	pubchem
Hongqu (red yeast rice)	MOL000098	quercetin	Matrix metalloproteinase 3	MMP3	P08254	pubchem
Danshen (Radix Salviae)	MOL000006	luteolin	Matrix metalloproteinase 9	MMP9	P14780	pubchem
Luhui (Aloe vera)	MOL000098	quercetin	Matrix metalloproteinase 9	MMP9	P14780	pubchem
Huanglian (Coptidis Rhizoma)	MOL000098	quercetin	Matrix metalloproteinase 9	MMP9	P14780	pubchem
Hongqu (red yeast rice)	MOL000098	quercetin	Matrix metalloproteinase 9	MMP9	P14780	pubchem
Zhimu (Anemarrhenae Rhizoma)	MOL000422	kaempferol	DNA-3-methyladenine glycosylase	MPG	P29372	pubchem
Luhui (Aloe vera)	MOL000098	quercetin	DNA-3-methyladenine glycosylase	MPG	P29372	pubchem
Huanglian (Coptidis Rhizoma)	MOL000098	quercetin	DNA-3-methyladenine glycosylase	MPG	P29372	pubchem
Hongqu (red yeast rice)	MOL000098	quercetin	DNA-3-methyladenine glycosylase	MPG	P29372	pubchem
Luhui (Aloe vera)	MOL000098	quercetin	M-phase phosphoprotein 8	MPHOSPH8	Q99549	pubchem
Huanglian (Coptidis Rhizoma)	MOL000098	quercetin	M-phase phosphoprotein 8	MPHOSPH8	Q99549	pubchem
Hongqu (red yeast rice)	MOL000098	quercetin	M-phase phosphoprotein 8	MPHOSPH8	Q99549	pubchem
Huanglian (Coptidis Rhizoma)	MOL002897	epiberberine	Mannose-6-phosphate isomerase	MPI	P34949	pubchem
Luhui (Aloe vera)	MOL000098	quercetin	myeloperoxidase	MPO	P05164	pubchem
Huanglian (Coptidis Rhizoma)	MOL000098	quercetin	myeloperoxidase	MPO	P05164	pubchem
Hongqu (red yeast rice)	MOL000098	quercetin	myeloperoxidase	MPO	P05164	pubchem
Danshen (Radix Salviae)	MOL001942	isoimperatorin	MAS related GPR family member X1	MRGPRX1	B5B0C6	pubchem
Luhui (Aloe vera)	MOL000471	aloe-emodin	Myc proto-oncogene protein	MYC	P01106	pubchem
Luhui (Aloe vera)	MOL002773	beta-carotene	Myc proto-oncogene protein	MYC	P01106	pubchem
Danshen (Radix Salviae)	MOL007107	C09092	MYC proto-oncogene, bHLH transcription factor	MYC	P01106	pubchem
Luhui (Aloe vera)	MOL000098	quercetin	Arginase (Leishmania amazonensis)	NA	O96394	pubchem
Huanglian (Coptidis Rhizoma)	MOL000098	quercetin	Arginase (Leishmania amazonensis)	NA	O96394	pubchem
Hongqu (red yeast rice)	MOL000098	quercetin	Arginase (Leishmania amazonensis)	NA	O96394	pubchem
Luhui (Aloe vera)	MOL000098	quercetin	NIMA related kinase 2	NEK2	P51955	pubchem
Huanglian (Coptidis Rhizoma)	MOL000098	quercetin	NIMA related kinase 2	NEK2	P51955	pubchem
Hongqu (red yeast rice)	MOL000098	quercetin	NIMA related kinase 2	NEK2	P51955	pubchem
Luhui (Aloe vera)	MOL000098	quercetin	NIMA related kinase 6	NEK6	Q9HC98	pubchem
Huanglian (Coptidis Rhizoma)	MOL000098	quercetin	NIMA related kinase 6	NEK6	Q9HC98	pubchem
Hongqu (red yeast rice)	MOL000098	quercetin	NIMA related kinase 6	NEK6	Q9HC98	pubchem
Zhimu (Anemarrhenae Rhizoma)	MOL000422	kaempferol	neuraminidase 2	NEU2	Q9Y3R4	pubchem
Danshen (Radix Salviae)	MOL000006	luteolin	neuraminidase 2	NEU2	Q9Y3R4	pubchem
Luhui (Aloe vera)	MOL000098	quercetin	neuraminidase 2	NEU2	Q9Y3R4	pubchem
Huanglian (Coptidis Rhizoma)	MOL000098	quercetin	neuraminidase 2	NEU2	Q9Y3R4	pubchem
Hongqu (red yeast rice)	MOL000098	quercetin	neuraminidase 2	NEU2	Q9Y3R4	pubchem
Luhui (Aloe vera)	MOL000471	aloe-emodin	nuclear factor, erythroid 2 like 2	NFE2L2	Q16236	pubchem
Hongqu (red yeast rice)	MOL007475	Ginsenoside f2	nuclear factor, erythroid 2 like 2	NFE2L2	Q16236	pubchem
Zhimu (Anemarrhenae Rhizoma)	MOL000422	kaempferol	nuclear factor, erythroid 2 like 2	NFE2L2	Q16236	pubchem
Danshen (Radix Salviae)	MOL000006	luteolin	nuclear factor, erythroid 2 like 2	NFE2L2	Q16236	pubchem
Luhui (Aloe vera)	MOL000098	quercetin	nuclear factor, erythroid 2 like 2	NFE2L2	Q16236	pubchem
Huanglian (Coptidis Rhizoma)	MOL000098	quercetin	nuclear factor, erythroid 2 like 2	NFE2L2	Q16236	pubchem
Hongqu (red yeast rice)	MOL000098	quercetin	nuclear factor, erythroid 2 like 2	NFE2L2	Q16236	pubchem
Danshen (Radix Salviae)	MOL007077	sclareol	nuclear factor, erythroid 2 like 2	NFE2L2	Q16236	pubchem
Danshen (Radix Salviae)	MOL007156	tanshinone Ⅵ	nuclear factor, erythroid 2 like 2	NFE2L2	Q16236	pubchem
Danshen (Radix Salviae)	MOL007154	tanshinone iia	nuclear factor, erythroid 2 like 2	NFE2L2	Q16236	pubchem
Danshen (Radix Salviae)	MOL007077	sclareol	nuclear factor kappa B subunit 1	NFKB1	P19838	pubchem
Danshen (Radix Salviae)	MOL007107	C09092	nuclear factor kappa B subunit 1	NFKB1	P19838	pubchem
Zhimu (Anemarrhenae Rhizoma)	MOL000422	kaempferol	nuclear factor kappa B subunit 1	NFKB1	P19838	pubchem
Danshen (Radix Salviae)	MOL000006	luteolin	nuclear factor kappa B subunit 1	NFKB1	P19838	pubchem
Luhui (Aloe vera)	MOL000098	quercetin	nuclear factor kappa B subunit 1	NFKB1	P19838	pubchem
Huanglian (Coptidis Rhizoma)	MOL000098	quercetin	nuclear factor kappa B subunit 1	NFKB1	P19838	pubchem
Hongqu (red yeast rice)	MOL000098	quercetin	nuclear factor kappa B subunit 1	NFKB1	P19838	pubchem
Zhimu (Anemarrhenae Rhizoma)	MOL000422	kaempferol	nuclear factor kappa B subunit 2	NFKB2	Q00653	pubchem
Danshen (Radix Salviae)	MOL000006	luteolin	nuclear factor kappa B subunit 2	NFKB2	Q00653	pubchem
Luhui (Aloe vera)	MOL000098	quercetin	nuclear factor kappa B subunit 2	NFKB2	Q00653	pubchem
Huanglian (Coptidis Rhizoma)	MOL000098	quercetin	nuclear factor kappa B subunit 2	NFKB2	Q00653	pubchem
Hongqu (red yeast rice)	MOL000098	quercetin	nuclear factor kappa B subunit 2	NFKB2	Q00653	pubchem
Zhimu (Anemarrhenae Rhizoma)	MOL000422	kaempferol	NF-kappaB inhibitor alpha	NFKBIA	P25963	pubchem
Danshen (Radix Salviae)	MOL000006	luteolin	NF-kappaB inhibitor alpha	NFKBIA	P25963	pubchem
Luhui (Aloe vera)	MOL000098	quercetin	NF-kappaB inhibitor alpha	NFKBIA	P25963	pubchem
Huanglian (Coptidis Rhizoma)	MOL000098	quercetin	NF-kappaB inhibitor alpha	NFKBIA	P25963	pubchem
Hongqu (red yeast rice)	MOL000098	quercetin	NF-kappaB inhibitor alpha	NFKBIA	P25963	pubchem
Luhui (Aloe vera)	MOL002773	beta-carotene	Nitric oxide synthase, inducible	NOS2	P35228	pubchem
Luhui (Aloe vera)	MOL001439	arachidonic acid	Nitric oxide synthase, endothelial	NOS3	P29474	pubchem
Zhimu (Anemarrhenae Rhizoma)	MOL000422	kaempferol	NADPH oxidase 4	NOX4	Q9NPH5	pubchem
Danshen (Radix Salviae)	MOL000006	luteolin	NADPH oxidase 4	NOX4	Q9NPH5	pubchem
Luhui (Aloe vera)	MOL000098	quercetin	NADPH oxidase 4	NOX4	Q9NPH5	pubchem
Huanglian (Coptidis Rhizoma)	MOL000098	quercetin	NADPH oxidase 4	NOX4	Q9NPH5	pubchem
Hongqu (red yeast rice)	MOL000098	quercetin	NADPH oxidase 4	NOX4	Q9NPH5	pubchem
Huanglian (Coptidis Rhizoma)	MOL002897	epiberberine	neuropeptide S receptor 1	NPSR1	Q6W5P4	pubchem
Luhui (Aloe vera)	MOL000098	quercetin	neuropeptide S receptor 1	NPSR1	Q6W5P4	pubchem
Huanglian (Coptidis Rhizoma)	MOL000098	quercetin	neuropeptide S receptor 1	NPSR1	Q6W5P4	pubchem
Hongqu (red yeast rice)	MOL000098	quercetin	neuropeptide S receptor 1	NPSR1	Q6W5P4	pubchem
Danshen (Radix Salviae)	MOL007077	sclareol	nuclear receptor subfamily 1 group H member 4	NR1H4	Q96RI1	pubchem
Zhimu (Anemarrhenae Rhizoma)	MOL000422	kaempferol	nuclear receptor subfamily 1 group H member 4	NR1H4	Q96RI1	pubchem
Luhui (Aloe vera)	MOL000098	quercetin	nuclear receptor subfamily 1 group H member 4	NR1H4	Q96RI1	pubchem
Huanglian (Coptidis Rhizoma)	MOL000098	quercetin	nuclear receptor subfamily 1 group H member 4	NR1H4	Q96RI1	pubchem
Hongqu (red yeast rice)	MOL000098	quercetin	nuclear receptor subfamily 1 group H member 4	NR1H4	Q96RI1	pubchem
Danshen (Radix Salviae)	MOL007077	sclareol	nuclear receptor subfamily 1 group I member 2	NR1I2	F1DAL3	pubchem
Luhui (Aloe vera)	MOL000471	aloe-emodin	nuclear receptor subfamily 1 group I member 2	NR1I2	F1DAL3	pubchem
Hongqu (red yeast rice)	MOL007475	Ginsenoside f2	nuclear receptor subfamily 1 group I member 2	NR1I2	O75469	pubchem
Zhimu (Anemarrhenae Rhizoma)	MOL000422	kaempferol	nuclear receptor subfamily 1 group I member 2	NR1I2	F1DAL3	pubchem
Luhui (Aloe vera)	MOL000098	quercetin	nuclear receptor subfamily 1 group I member 2	NR1I2	F1DAL3	pubchem
Huanglian (Coptidis Rhizoma)	MOL000098	quercetin	nuclear receptor subfamily 1 group I member 2	NR1I2	F1DAL3	pubchem
Hongqu (red yeast rice)	MOL000098	quercetin	nuclear receptor subfamily 1 group I member 2	NR1I2	F1DAL3	pubchem
Danshen (Radix Salviae)	MOL007077	sclareol	nuclear receptor subfamily 1 group I member 3	NR1I3	Q14994	pubchem
Zhimu (Anemarrhenae Rhizoma)	MOL000422	kaempferol	nuclear receptor subfamily 1 group I member 3	NR1I3	Q14994	pubchem
Luhui (Aloe vera)	MOL000098	quercetin	nuclear receptor subfamily 1 group I member 3	NR1I3	Q14994	pubchem
Huanglian (Coptidis Rhizoma)	MOL000098	quercetin	nuclear receptor subfamily 1 group I member 3	NR1I3	Q14994	pubchem
Hongqu (red yeast rice)	MOL000098	quercetin	nuclear receptor subfamily 1 group I member 3	NR1I3	Q14994	pubchem
Luhui (Aloe vera)	MOL000471	aloe-emodin	nuclear receptor subfamily 3 group C member 1	NR3C1	P04150	pubchem
Zhimu (Anemarrhenae Rhizoma)	MOL000422	kaempferol	nuclear receptor subfamily 3 group C member 1	NR3C1	P04150	pubchem
Danshen (Radix Salviae)	MOL000006	luteolin	nuclear receptor subfamily 3 group C member 1	NR3C1	P04150	pubchem
Luhui (Aloe vera)	MOL000098	quercetin	nuclear receptor subfamily 3 group C member 1	NR3C1	P04150	pubchem
Huanglian (Coptidis Rhizoma)	MOL000098	quercetin	nuclear receptor subfamily 3 group C member 1	NR3C1	P04150	pubchem
Hongqu (red yeast rice)	MOL000098	quercetin	nuclear receptor subfamily 3 group C member 1	NR3C1	P04150	pubchem
Luhui (Aloe vera)	MOL000098	quercetin	NUAK family kinase 1	NUAK1	O60285	pubchem
Huanglian (Coptidis Rhizoma)	MOL000098	quercetin	NUAK family kinase 1	NUAK1	O60285	pubchem
Hongqu (red yeast rice)	MOL000098	quercetin	NUAK family kinase 1	NUAK1	O60285	pubchem
Zhimu (Anemarrhenae Rhizoma)	MOL000422	kaempferol	Oleandomycin glycosyltransferase (Streptomyces antibioticus)	oleD	Q53685	pubchem
Danshen (Radix Salviae)	MOL007101	dihydrotanshinoneⅠ	orf1a polyprotein (pp1a);orf1ab polyprotein (pp1ab) (SARS coronavirus)	orf1ab	P0C6U8	pubchem
Danshen (Radix Salviae)	MOL007122	Miltirone	orf1a polyprotein (pp1a);orf1ab polyprotein (pp1ab) (SARS coronavirus)	orf1ab	P0C6U8	pubchem
Danshen (Radix Salviae)	MOL007156	tanshinone Ⅵ	orf1a polyprotein (pp1a);orf1ab polyprotein (pp1ab) (SARS coronavirus)	orf1ab	P0C6U8	pubchem
Danshen (Radix Salviae)	MOL007154	tanshinone iia	orf1a polyprotein (pp1a);orf1ab polyprotein (pp1ab) (SARS coronavirus)	orf1ab	P0C6U8	pubchem
Luhui (Aloe vera)	MOL000098	quercetin	oxidative stress responsive kinase 1	OXSR1	O95747	pubchem
Huanglian (Coptidis Rhizoma)	MOL000098	quercetin	oxidative stress responsive kinase 1	OXSR1	O95747	pubchem
Hongqu (red yeast rice)	MOL000098	quercetin	oxidative stress responsive kinase 1	OXSR1	O95747	pubchem
Luhui (Aloe vera)	MOL001439	arachidonic acid	Oxytocin receptor	OXTR	P30559	pubchem
Luhui (Aloe vera)	MOL000471	aloe-emodin	purinergic receptor P2Y12	P2RY12	Q9H244	pubchem
Danshen (Radix Salviae)	MOL007156	tanshinone Ⅵ	Polyadenylate-binding protein 1	PABPC1	P11940	pubchem
Danshen (Radix Salviae)	MOL007154	tanshinone iia	Polyadenylate-binding protein 1	PABPC1	P11940	pubchem
Danshen (Radix Salviae)	MOL000006	luteolin	platelet activating factor acetylhydrolase 1b catalytic subunit 2	PAFAH1B2	P68402	pubchem
Danshen (Radix Salviae)	MOL007156	tanshinone Ⅵ	platelet activating factor acetylhydrolase 1b catalytic subunit 2	PAFAH1B2	P68402	pubchem
Danshen (Radix Salviae)	MOL007154	tanshinone iia	platelet activating factor acetylhydrolase 1b catalytic subunit 2	PAFAH1B2	P68402	pubchem
Danshen (Radix Salviae)	MOL007088	cryptotanshinone	platelet activating factor acetylhydrolase 1b catalytic subunit 3	PAFAH1B3	Q15102	pubchem
Zhimu (Anemarrhenae Rhizoma)	MOL000422	kaempferol	platelet activating factor acetylhydrolase 1b catalytic subunit 3	PAFAH1B3	Q15102	pubchem
Danshen (Radix Salviae)	MOL000006	luteolin	platelet activating factor acetylhydrolase 1b catalytic subunit 3	PAFAH1B3	Q15102	pubchem
Danshen (Radix Salviae)	MOL007088	cryptotanshinone	platelet activating factor acetylhydrolase 2	PAFAH2	Q99487	pubchem
Danshen (Radix Salviae)	MOL007156	tanshinone Ⅵ	platelet activating factor acetylhydrolase 2	PAFAH2	Q99487	pubchem
Danshen (Radix Salviae)	MOL007154	tanshinone iia	platelet activating factor acetylhydrolase 2	PAFAH2	Q99487	pubchem
Luhui (Aloe vera)	MOL000098	quercetin	p21 (RAC1) activated kinase 4	PAK4	O96013	pubchem
Huanglian (Coptidis Rhizoma)	MOL000098	quercetin	p21 (RAC1) activated kinase 4	PAK4	O96013	pubchem
Hongqu (red yeast rice)	MOL000098	quercetin	p21 (RAC1) activated kinase 4	PAK4	O96013	pubchem
Luhui (Aloe vera)	MOL000098	quercetin	p21 (RAC1) activated kinase 5	PAK5	Q9P286	pubchem
Huanglian (Coptidis Rhizoma)	MOL000098	quercetin	p21 (RAC1) activated kinase 5	PAK5	Q9P286	pubchem
Hongqu (red yeast rice)	MOL000098	quercetin	p21 (RAC1) activated kinase 5	PAK5	Q9P286	pubchem
Luhui (Aloe vera)	MOL000098	quercetin	p21 (RAC1) activated kinase 6	PAK6	Q9NQU5	pubchem
Huanglian (Coptidis Rhizoma)	MOL000098	quercetin	p21 (RAC1) activated kinase 6	PAK6	Q9NQU5	pubchem
Hongqu (red yeast rice)	MOL000098	quercetin	p21 (RAC1) activated kinase 6	PAK6	Q9NQU5	pubchem
Danshen (Radix Salviae)	MOL000006	luteolin	Poly [ADP-ribose] polymerase-1	PARP1	P09874	pubchem
Luhui (Aloe vera)	MOL000098	quercetin	PDZ binding kinase	PBK	Q96KB5	pubchem
Huanglian (Coptidis Rhizoma)	MOL000098	quercetin	PDZ binding kinase	PBK	Q96KB5	pubchem
Hongqu (red yeast rice)	MOL000098	quercetin	PDZ binding kinase	PBK	Q96KB5	pubchem
Danshen (Radix Salviae)	MOL000006	luteolin	polybromo 1	PBRM1	Q86U86	pubchem
Luhui (Aloe vera)	MOL000471	aloe-emodin	Proliferating cell nuclear antigen	PCNA	P12004	pubchem
Danshen (Radix Salviae)	MOL000006	luteolin	phosphodiesterase 4B	PDE4B	Q07343	pubchem
Luhui (Aloe vera)	MOL000098	quercetin	phosphodiesterase 4B	PDE4B	Q07343	pubchem
Huanglian (Coptidis Rhizoma)	MOL000098	quercetin	phosphodiesterase 4B	PDE4B	Q07343	pubchem
Hongqu (red yeast rice)	MOL000098	quercetin	phosphodiesterase 4B	PDE4B	Q07343	pubchem
Luhui (Aloe vera)	MOL000098	quercetin	phosphodiesterase 5A	PDE5A	O76074	pubchem
Huanglian (Coptidis Rhizoma)	MOL000098	quercetin	phosphodiesterase 5A	PDE5A	O76074	pubchem
Hongqu (red yeast rice)	MOL000098	quercetin	phosphodiesterase 5A	PDE5A	O76074	pubchem
Luhui (Aloe vera)	MOL000098	quercetin	pyruvate dehydrogenase kinase 1	PDK1	Q15118	pubchem
Huanglian (Coptidis Rhizoma)	MOL000098	quercetin	pyruvate dehydrogenase kinase 1	PDK1	Q15118	pubchem
Hongqu (red yeast rice)	MOL000098	quercetin	pyruvate dehydrogenase kinase 1	PDK1	Q15118	pubchem
Luhui (Aloe vera)	MOL000098	quercetin	3-phosphoinositide dependent protein kinase 1	PDPK1	O15530	pubchem
Huanglian (Coptidis Rhizoma)	MOL000098	quercetin	3-phosphoinositide dependent protein kinase 1	PDPK1	O15530	pubchem
Hongqu (red yeast rice)	MOL000098	quercetin	3-phosphoinositide dependent protein kinase 1	PDPK1	O15530	pubchem
Luhui (Aloe vera)	MOL001439	arachidonic acid	Platelet endothelial cell adhesion molecule	PECAM1	P16284	pubchem
Luhui (Aloe vera)	MOL000098	quercetin	phosphogluconate dehydrogenase	PGD	P52209	pubchem
Huanglian (Coptidis Rhizoma)	MOL000098	quercetin	phosphogluconate dehydrogenase	PGD	P52209	pubchem
Hongqu (red yeast rice)	MOL000098	quercetin	phosphogluconate dehydrogenase	PGD	P52209	pubchem
Luhui (Aloe vera)	MOL000098	quercetin	Progesterone receptor	PGR	P06401	pubchem
Huanglian (Coptidis Rhizoma)	MOL000098	quercetin	Progesterone receptor	PGR	P06401	pubchem
Hongqu (red yeast rice)	MOL000098	quercetin	Progesterone receptor	PGR	P06401	pubchem
Luhui (Aloe vera)	MOL000098	quercetin	PI3-kinase p110-alpha subunit	PIK3CA	P42336	pubchem
Huanglian (Coptidis Rhizoma)	MOL000098	quercetin	PI3-kinase p110-alpha subunit	PIK3CA	P42336	pubchem
Hongqu (red yeast rice)	MOL000098	quercetin	PI3-kinase p110-alpha subunit	PIK3CA	P42336	pubchem
Luhui (Aloe vera)	MOL000098	quercetin	PI3-kinase p110-gamma subunit	PIK3CG	P48736	pubchem
Huanglian (Coptidis Rhizoma)	MOL000098	quercetin	PI3-kinase p110-gamma subunit	PIK3CG	P48736	pubchem
Hongqu (red yeast rice)	MOL000098	quercetin	PI3-kinase p110-gamma subunit	PIK3CG	P48736	pubchem
Luhui (Aloe vera)	MOL000098	quercetin	PI3-kinase p85-alpha subunit	PIK3R1	P27986	pubchem
Huanglian (Coptidis Rhizoma)	MOL000098	quercetin	PI3-kinase p85-alpha subunit	PIK3R1	P27986	pubchem
Hongqu (red yeast rice)	MOL000098	quercetin	PI3-kinase p85-alpha subunit	PIK3R1	P27986	pubchem
Luhui (Aloe vera)	MOL002773	beta-carotene	Serine/threonine-protein kinase PIM1	PIM1	P11309	pubchem
Zhimu (Anemarrhenae Rhizoma)	MOL000422	kaempferol	Serine/threonine-protein kinase PIM1	PIM1	P11309	pubchem
Danshen (Radix Salviae)	MOL000006	luteolin	Serine/threonine-protein kinase PIM1	PIM1	P11309	pubchem
Luhui (Aloe vera)	MOL000098	quercetin	Serine/threonine-protein kinase PIM1	PIM1	P11309	pubchem
Huanglian (Coptidis Rhizoma)	MOL000098	quercetin	Serine/threonine-protein kinase PIM1	PIM1	P11309	pubchem
Hongqu (red yeast rice)	MOL000098	quercetin	Serine/threonine-protein kinase PIM1	PIM1	P11309	pubchem
Zhimu (Anemarrhenae Rhizoma)	MOL000422	kaempferol	Pim-2 proto-oncogene, serine/threonine kinase	PIM2	Q9P1W9	pubchem
Danshen (Radix Salviae)	MOL000006	luteolin	Pim-2 proto-oncogene, serine/threonine kinase	PIM2	Q9P1W9	pubchem
Luhui (Aloe vera)	MOL000098	quercetin	Pim-2 proto-oncogene, serine/threonine kinase	PIM2	Q9P1W9	pubchem
Huanglian (Coptidis Rhizoma)	MOL000098	quercetin	Pim-2 proto-oncogene, serine/threonine kinase	PIM2	Q9P1W9	pubchem
Hongqu (red yeast rice)	MOL000098	quercetin	Pim-2 proto-oncogene, serine/threonine kinase	PIM2	Q9P1W9	pubchem
Luhui (Aloe vera)	MOL000098	quercetin	Pim-3 proto-oncogene, serine/threonine kinase	PIM3	Q86V86	pubchem
Huanglian (Coptidis Rhizoma)	MOL000098	quercetin	Pim-3 proto-oncogene, serine/threonine kinase	PIM3	Q86V86	pubchem
Hongqu (red yeast rice)	MOL000098	quercetin	Pim-3 proto-oncogene, serine/threonine kinase	PIM3	Q86V86	pubchem
Luhui (Aloe vera)	MOL000471	aloe-emodin	peptidylprolyl cis/trans isomerase, NIMA-interacting 1	PIN1	Q13526	pubchem
Huanglian (Coptidis Rhizoma)	MOL002897	epiberberine	peptidylprolyl cis/trans isomerase, NIMA-interacting 1	PIN1	Q13526	pubchem
Danshen (Radix Salviae)	MOL000006	luteolin	peptidylprolyl cis/trans isomerase, NIMA-interacting 1	PIN1	Q13526	pubchem
Luhui (Aloe vera)	MOL000098	quercetin	peptidylprolyl cis/trans isomerase, NIMA-interacting 1	PIN1	Q13526	pubchem
Huanglian (Coptidis Rhizoma)	MOL000098	quercetin	peptidylprolyl cis/trans isomerase, NIMA-interacting 1	PIN1	Q13526	pubchem
Hongqu (red yeast rice)	MOL000098	quercetin	peptidylprolyl cis/trans isomerase, NIMA-interacting 1	PIN1	Q13526	pubchem
Danshen (Radix Salviae)	MOL007088	cryptotanshinone	phosphatidylinositol5phosphate 4kinase type 2 alpha	PIP4K2A	P48426	pubchem
Zhimu (Anemarrhenae Rhizoma)	MOL000422	kaempferol	phosphatidylinositol5phosphate 4kinase type 2 alpha	PIP4K2A	P48426	pubchem
Danshen (Radix Salviae)	MOL000006	luteolin	phosphatidylinositol5phosphate 4kinase type 2 alpha	PIP4K2A	P48426	pubchem
Danshen (Radix Salviae)	MOL007156	tanshinone Ⅵ	phosphatidylinositol5phosphate 4kinase type 2 alpha	PIP4K2A	P48426	pubchem
Danshen (Radix Salviae)	MOL007154	tanshinone iia	phosphatidylinositol5phosphate 4kinase type 2 alpha	PIP4K2A	P48426	pubchem
Luhui (Aloe vera)	MOL000098	quercetin	protein kinase N1	PKN1	Q16512	pubchem
Huanglian (Coptidis Rhizoma)	MOL000098	quercetin	protein kinase N1	PKN1	Q16512	pubchem
Hongqu (red yeast rice)	MOL000098	quercetin	protein kinase N1	PKN1	Q16512	pubchem
Luhui (Aloe vera)	MOL000098	quercetin	phospholipase A2 group IB	PLA2G1B	P04054	pubchem
Huanglian (Coptidis Rhizoma)	MOL000098	quercetin	phospholipase A2 group IB	PLA2G1B	P04054	pubchem
Hongqu (red yeast rice)	MOL000098	quercetin	phospholipase A2 group IB	PLA2G1B	P04054	pubchem
Luhui (Aloe vera)	MOL001439	arachidonic acid	phospholipase A2 group VII	PLA2G7	Q13093	pubchem
Danshen (Radix Salviae)	MOL007088	cryptotanshinone	phospholipase A2 group VII	PLA2G7	Q13093	pubchem
Danshen (Radix Salviae)	MOL007156	tanshinone Ⅵ	phospholipase A2 group VII	PLA2G7	Q13093	pubchem
Danshen (Radix Salviae)	MOL007154	tanshinone iia	phospholipase A2 group VII	PLA2G7	Q13093	pubchem
Danshen (Radix Salviae)	MOL000006	luteolin	plasminogen activator, urokinase (house mouse)	Plau	P06869	pubchem
Luhui (Aloe vera)	MOL000098	quercetin	plasminogen activator, urokinase	PLAU	P00749	pubchem
Huanglian (Coptidis Rhizoma)	MOL000098	quercetin	plasminogen activator, urokinase	PLAU	P00749	pubchem
Hongqu (red yeast rice)	MOL000098	quercetin	plasminogen activator, urokinase	PLAU	P00749	pubchem
Danshen (Radix Salviae)	MOL000006	luteolin	plasminogen	PLG	P00747	pubchem
Luhui (Aloe vera)	MOL000098	quercetin	plasminogen	PLG	P00747	pubchem
Huanglian (Coptidis Rhizoma)	MOL000098	quercetin	plasminogen	PLG	P00747	pubchem
Hongqu (red yeast rice)	MOL000098	quercetin	plasminogen	PLG	P00747	pubchem
Danshen (Radix Salviae)	MOL007088	cryptotanshinone	polo like kinase 1	PLK1	P53350	pubchem
Huanglian (Coptidis Rhizoma)	MOL002897	epiberberine	polo like kinase 1	PLK1	P53350	pubchem
Luhui (Aloe vera)	MOL000098	quercetin	polo like kinase 1	PLK1	P53350	pubchem
Huanglian (Coptidis Rhizoma)	MOL000098	quercetin	polo like kinase 1	PLK1	P53350	pubchem
Hongqu (red yeast rice)	MOL000098	quercetin	polo like kinase 1	PLK1	P53350	pubchem
Danshen (Radix Salviae)	MOL007156	tanshinone Ⅵ	polo like kinase 1	PLK1	P53350	pubchem
Danshen (Radix Salviae)	MOL007154	tanshinone iia	polo like kinase 1	PLK1	P53350	pubchem
Luhui (Aloe vera)	MOL000098	quercetin	polo like kinase 4	PLK4	O00444	pubchem
Huanglian (Coptidis Rhizoma)	MOL000098	quercetin	polo like kinase 4	PLK4	O00444	pubchem
Hongqu (red yeast rice)	MOL000098	quercetin	polo like kinase 4	PLK4	O00444	pubchem
Luhui (Aloe vera)	MOL000098	quercetin	peripheral myelin protein 22	PMP22	Q01453	pubchem
Huanglian (Coptidis Rhizoma)	MOL000098	quercetin	peripheral myelin protein 22	PMP22	Q01453	pubchem
Hongqu (red yeast rice)	MOL000098	quercetin	peripheral myelin protein 22	PMP22	Q01453	pubchem
Huanglian (Coptidis Rhizoma)	MOL000358	beta-sitosterol	DNA polymerase beta	POLB	P06746	pubchem
Danshen (Radix Salviae)	MOL007088	cryptotanshinone	DNA polymerase beta	POLB	P06746	pubchem
Hongqu (red yeast rice)	MOL001525	Daucosterol	DNA polymerase beta	POLB	P06746	pubchem
Huanglian (Coptidis Rhizoma)	MOL002897	epiberberine	DNA polymerase beta	POLB	P06746	pubchem
Danshen (Radix Salviae)	MOL000006	luteolin	DNA polymerase beta	POLB	P06746	pubchem
Luhui (Aloe vera)	MOL000098	quercetin	DNA polymerase beta	POLB	P06746	pubchem
Huanglian (Coptidis Rhizoma)	MOL000098	quercetin	DNA polymerase beta	POLB	P06746	pubchem
Hongqu (red yeast rice)	MOL000098	quercetin	DNA polymerase beta	POLB	P06746	pubchem
Luhui (Aloe vera)	MOL000359	sitosterol	DNA polymerase beta	POLB	P06746	pubchem
Zhimu (Anemarrhenae Rhizoma)	MOL000449	Stigmasterol	DNA polymerase beta	POLB	P06746	pubchem
Hongqu (red yeast rice)	MOL000449	Stigmasterol	DNA polymerase beta	POLB	P06746	pubchem
Danshen (Radix Salviae)	MOL007156	tanshinone Ⅵ	DNA polymerase beta	POLB	P06746	pubchem
Danshen (Radix Salviae)	MOL007154	tanshinone iia	DNA polymerase beta	POLB	P06746	pubchem
Kugua (Momordica charantia)	MOL008569	β-sitosterol-β-d-glucoside	DNA polymerase beta	POLB	P06746	pubchem
Danshen (Radix Salviae)	MOL007088	cryptotanshinone	DNA polymerase eta	POLH	Q9Y253	pubchem
Huanglian (Coptidis Rhizoma)	MOL002897	epiberberine	DNA polymerase eta	POLH	Q9Y253	pubchem
Zhimu (Anemarrhenae Rhizoma)	MOL000422	kaempferol	DNA polymerase eta	POLH	Q9Y253	pubchem
Danshen (Radix Salviae)	MOL000006	luteolin	DNA polymerase eta	POLH	Q9Y253	pubchem
Luhui (Aloe vera)	MOL000098	quercetin	DNA polymerase eta	POLH	Q9Y253	pubchem
Huanglian (Coptidis Rhizoma)	MOL000098	quercetin	DNA polymerase eta	POLH	Q9Y253	pubchem
Hongqu (red yeast rice)	MOL000098	quercetin	DNA polymerase eta	POLH	Q9Y253	pubchem
Danshen (Radix Salviae)	MOL007156	tanshinone Ⅵ	DNA polymerase eta	POLH	Q9Y253	pubchem
Danshen (Radix Salviae)	MOL007154	tanshinone iia	DNA polymerase eta	POLH	Q9Y253	pubchem
Luhui (Aloe vera)	MOL000471	aloe-emodin	DNA polymerase iota	POLI	Q9UNA4	pubchem
Danshen (Radix Salviae)	MOL007088	cryptotanshinone	DNA polymerase iota	POLI	Q9UNA4	pubchem
Huanglian (Coptidis Rhizoma)	MOL002897	epiberberine	DNA polymerase iota	POLI	Q9UNA4	pubchem
Zhimu (Anemarrhenae Rhizoma)	MOL000422	kaempferol	DNA polymerase iota	POLI	Q9UNA4	pubchem
Danshen (Radix Salviae)	MOL000006	luteolin	DNA polymerase iota	POLI	Q9UNA4	pubchem
Luhui (Aloe vera)	MOL000098	quercetin	DNA polymerase iota	POLI	Q9UNA4	pubchem
Huanglian (Coptidis Rhizoma)	MOL000098	quercetin	DNA polymerase iota	POLI	Q9UNA4	pubchem
Hongqu (red yeast rice)	MOL000098	quercetin	DNA polymerase iota	POLI	Q9UNA4	pubchem
Danshen (Radix Salviae)	MOL007156	tanshinone Ⅵ	DNA polymerase iota	POLI	Q9UNA4	pubchem
Danshen (Radix Salviae)	MOL007154	tanshinone iia	DNA polymerase iota	POLI	Q9UNA4	pubchem
Luhui (Aloe vera)	MOL001439	arachidonic acid	DNA polymerase kappa	POLK	Q9UBT6	pubchem
Danshen (Radix Salviae)	MOL000006	luteolin	DNA polymerase kappa	POLK	Q9UBT6	pubchem
Kugua (Momordica charantia)	MOL010267	lycopene	DNA polymerase kappa	POLK	Q9UBT6	pubchem
Luhui (Aloe vera)	MOL000098	quercetin	DNA polymerase kappa	POLK	Q9UBT6	pubchem
Huanglian (Coptidis Rhizoma)	MOL000098	quercetin	DNA polymerase kappa	POLK	Q9UBT6	pubchem
Hongqu (red yeast rice)	MOL000098	quercetin	DNA polymerase kappa	POLK	Q9UBT6	pubchem
Danshen (Radix Salviae)	MOL007156	tanshinone Ⅵ	DNA polymerase kappa	POLK	Q9UBT6	pubchem
Danshen (Radix Salviae)	MOL007154	tanshinone iia	DNA polymerase kappa	POLK	Q9UBT6	pubchem
Luhui (Aloe vera)	MOL000359	sitosterol	Serum paraoxonase/arylesterase 1	PON1	P27169	pubchem
Zhimu (Anemarrhenae Rhizoma)	MOL000422	kaempferol	paraoxonase 1	PON1	P27169	pubchem
Danshen (Radix Salviae)	MOL000006	luteolin	paraoxonase 1	PON1	P27169	pubchem
Luhui (Aloe vera)	MOL000098	quercetin	paraoxonase 1	PON1	P27169	pubchem
Huanglian (Coptidis Rhizoma)	MOL000098	quercetin	paraoxonase 1	PON1	P27169	pubchem
Hongqu (red yeast rice)	MOL000098	quercetin	paraoxonase 1	PON1	P27169	pubchem
Danshen (Radix Salviae)	MOL000006	luteolin	Cytoplasmic zinc-finger protein	pos-1	G5EF15	pubchem
Luhui (Aloe vera)	MOL002773	beta-carotene	Peroxisome proliferator-activated receptor alpha	PPARA	Q07869	pubchem
Luhui (Aloe vera)	MOL001439	arachidonic acid	peroxisome proliferator activated receptor alpha	PPARA	Q07869	pubchem
Zhimu (Anemarrhenae Rhizoma)	MOL000422	kaempferol	peroxisome proliferator activated receptor alpha	PPARA	Q07869	pubchem
Danshen (Radix Salviae)	MOL007077	sclareol	Peroxisome proliferator-activated receptor delta	PPARD	Q03181	pubchem
Luhui (Aloe vera)	MOL000471	aloe-emodin	Peroxisome proliferator-activated receptor delta	PPARD	Q03181	pubchem
Luhui (Aloe vera)	MOL001439	arachidonic acid	Peroxisome proliferator-activated receptor delta	PPARD	Q03181	pubchem
Zhimu (Anemarrhenae Rhizoma)	MOL000422	kaempferol	Peroxisome proliferator-activated receptor delta	PPARD	Q03181	pubchem
Luhui (Aloe vera)	MOL000098	quercetin	Peroxisome proliferator-activated receptor delta	PPARD	Q03181	pubchem
Huanglian (Coptidis Rhizoma)	MOL000098	quercetin	Peroxisome proliferator-activated receptor delta	PPARD	Q03181	pubchem
Hongqu (red yeast rice)	MOL000098	quercetin	Peroxisome proliferator-activated receptor delta	PPARD	Q03181	pubchem
Danshen (Radix Salviae)	MOL007077	sclareol	Peroxisome proliferator-activated receptor gamma	PPARG	P37231	pubchem
Luhui (Aloe vera)	MOL000471	aloe-emodin	Peroxisome proliferator-activated receptor gamma	PPARG	P37231	pubchem
Luhui (Aloe vera)	MOL001439	arachidonic acid	Peroxisome proliferator-activated receptor gamma	PPARG	P37231	pubchem
Zhimu (Anemarrhenae Rhizoma)	MOL000422	kaempferol	Peroxisome proliferator-activated receptor gamma	PPARG	P37231	pubchem
Kugua (Momordica charantia)	MOL010267	lycopene	Peroxisome proliferator-activated receptor gamma	PPARG	P37231	pubchem
Luhui (Aloe vera)	MOL000098	quercetin	Peroxisome proliferator-activated receptor gamma	PPARG	P37231	pubchem
Huanglian (Coptidis Rhizoma)	MOL000098	quercetin	Peroxisome proliferator-activated receptor gamma	PPARG	P37231	pubchem
Hongqu (red yeast rice)	MOL000098	quercetin	Peroxisome proliferator-activated receptor gamma	PPARG	P37231	pubchem
Zhimu (Anemarrhenae Rhizoma)	MOL000631	coumaroyltyramine	Polyphenol oxidase 2 (Agaricus bisporus)	PPO2	O42713	pubchem
Zhimu (Anemarrhenae Rhizoma)	MOL000422	kaempferol	Polyphenol oxidase 2 (Agaricus bisporus)	PPO2	O42713	pubchem
Danshen (Radix Salviae)	MOL000006	luteolin	Polyphenol oxidase 2 (Agaricus bisporus)	PPO2	O42713	pubchem
Luhui (Aloe vera)	MOL001439	arachidonic acid	Serine/threonine-protein phosphatase 5	PPP5C	P53041	pubchem
Danshen (Radix Salviae)	MOL002776	Baicalin	prolyl endopeptidase	PREP	P48147	pubchem
Zhimu (Anemarrhenae Rhizoma)	MOL000422	kaempferol	prolyl endopeptidase	PREP	P48147	pubchem
Luhui (Aloe vera)	MOL000098	quercetin	prolyl endopeptidase	PREP	P48147	pubchem
Huanglian (Coptidis Rhizoma)	MOL000098	quercetin	prolyl endopeptidase	PREP	P48147	pubchem
Hongqu (red yeast rice)	MOL000098	quercetin	prolyl endopeptidase	PREP	P48147	pubchem
Luhui (Aloe vera)	MOL000098	quercetin	protein kinase AMP-activated catalytic subunit alpha 2	PRKAA2	P54646	pubchem
Huanglian (Coptidis Rhizoma)	MOL000098	quercetin	protein kinase AMP-activated catalytic subunit alpha 2	PRKAA2	P54646	pubchem
Hongqu (red yeast rice)	MOL000098	quercetin	protein kinase AMP-activated catalytic subunit alpha 2	PRKAA2	P54646	pubchem
Luhui (Aloe vera)	MOL000098	quercetin	cAMP-dependent protein kinase alpha-catalytic subunit	PRKACA	P17612	pubchem
Huanglian (Coptidis Rhizoma)	MOL000098	quercetin	cAMP-dependent protein kinase alpha-catalytic subunit	PRKACA	P17612	pubchem
Hongqu (red yeast rice)	MOL000098	quercetin	cAMP-dependent protein kinase alpha-catalytic subunit	PRKACA	P17612	pubchem
Luhui (Aloe vera)	MOL000471	aloe-emodin	Protein kinase C alpha	PRKCA	P17252	pubchem
Luhui (Aloe vera)	MOL000359	sitosterol	Protein kinase C alpha	PRKCA	P17252	pubchem
Luhui (Aloe vera)	MOL000098	quercetin	Protein kinase C alpha	PRKCA	P17252	pubchem
Huanglian (Coptidis Rhizoma)	MOL000098	quercetin	Protein kinase C alpha	PRKCA	P17252	pubchem
Hongqu (red yeast rice)	MOL000098	quercetin	Protein kinase C alpha	PRKCA	P17252	pubchem
Luhui (Aloe vera)	MOL001439	arachidonic acid	Protein kinase C beta type	PRKCB	P05771	pubchem
Luhui (Aloe vera)	MOL000471	aloe-emodin	Protein kinase C delta type	PRKCD	Q05655	pubchem
Luhui (Aloe vera)	MOL001439	arachidonic acid	protein kinase C zeta	PRKCZ	Q05513	pubchem
Luhui (Aloe vera)	MOL000098	quercetin	parkin RBR E3 ubiquitin protein ligase	PRKN	O60260	pubchem
Huanglian (Coptidis Rhizoma)	MOL000098	quercetin	parkin RBR E3 ubiquitin protein ligase	PRKN	O60260	pubchem
Hongqu (red yeast rice)	MOL000098	quercetin	parkin RBR E3 ubiquitin protein ligase	PRKN	O60260	pubchem
Huanglian (Coptidis Rhizoma)	MOL002897	epiberberine	protein arginine methyltransferase 1	PRMT1	Q99873	pubchem
Danshen (Radix Salviae)	MOL002776	Baicalin	serine protease 1	PRSS1	P07477	pubchem
Luhui (Aloe vera)	MOL000098	quercetin	serine protease 1	PRSS1	P07477	pubchem
Huanglian (Coptidis Rhizoma)	MOL000098	quercetin	serine protease 1	PRSS1	P07477	pubchem
Hongqu (red yeast rice)	MOL000098	quercetin	serine protease 1	PRSS1	P07477	pubchem
Danshen (Radix Salviae)	MOL002776	Baicalin	serine protease 2	PRSS2	P07478	pubchem
Luhui (Aloe vera)	MOL000098	quercetin	serine protease 2	PRSS2	P07478	pubchem
Huanglian (Coptidis Rhizoma)	MOL000098	quercetin	serine protease 2	PRSS2	P07478	pubchem
Hongqu (red yeast rice)	MOL000098	quercetin	serine protease 2	PRSS2	P07478	pubchem
Danshen (Radix Salviae)	MOL002776	Baicalin	serine protease 3	PRSS3	P35030	pubchem
Luhui (Aloe vera)	MOL000098	quercetin	serine protease 3	PRSS3	P35030	pubchem
Huanglian (Coptidis Rhizoma)	MOL000098	quercetin	serine protease 3	PRSS3	P35030	pubchem
Hongqu (red yeast rice)	MOL000098	quercetin	serine protease 3	PRSS3	P35030	pubchem
Danshen (Radix Salviae)	MOL000006	luteolin	PC4 and SFRS1 interacting protein 1	PSIP1	O75475	pubchem
Huanglian (Coptidis Rhizoma)	MOL002897	epiberberine	polypyrimidine tract binding protein 1	PTBP1	P26599	pubchem
Luhui (Aloe vera)	MOL001439	arachidonic acid	Phosphatidylinositol-3,4,5-trisphosphate 3-phosphatase and dual-specificity protein phosphatase PTEN	PTEN	P60484	pubchem
Zhimu (Anemarrhenae Rhizoma)	MOL000422	kaempferol	Cyclooxygenase-1	PTGS1	P23219	pubchem
Danshen (Radix Salviae)	MOL000006	luteolin	Cyclooxygenase-1	PTGS1	P23219	pubchem
Luhui (Aloe vera)	MOL000098	quercetin	Cyclooxygenase-1	PTGS1	P23219	pubchem
Huanglian (Coptidis Rhizoma)	MOL000098	quercetin	Cyclooxygenase-1	PTGS1	P23219	pubchem
Hongqu (red yeast rice)	MOL000098	quercetin	Cyclooxygenase-1	PTGS1	P23219	pubchem
Luhui (Aloe vera)	MOL001439	arachidonic acid	Cyclooxygenase-2	PTGS2	P35354	pubchem
Luhui (Aloe vera)	MOL002773	beta-carotene	Cyclooxygenase-2	PTGS2	P35354	pubchem
Luhui (Aloe vera)	MOL001439	arachidonic acid	Cyclooxygenase-2	PTGS2	P35354	pubchem
Zhimu (Anemarrhenae Rhizoma)	MOL000422	kaempferol	Cyclooxygenase-2	PTGS2	P35354	pubchem
Danshen (Radix Salviae)	MOL000006	luteolin	Cyclooxygenase-2	PTGS2	P35354	pubchem
Luhui (Aloe vera)	MOL000098	quercetin	Cyclooxygenase-2	PTGS2	P35354	pubchem
Huanglian (Coptidis Rhizoma)	MOL000098	quercetin	Cyclooxygenase-2	PTGS2	P35354	pubchem
Hongqu (red yeast rice)	MOL000098	quercetin	Cyclooxygenase-2	PTGS2	P35354	pubchem
Luhui (Aloe vera)	MOL000098	quercetin	protein tyrosine kinase 2	PTK2	Q05397	pubchem
Huanglian (Coptidis Rhizoma)	MOL000098	quercetin	protein tyrosine kinase 2	PTK2	Q05397	pubchem
Hongqu (red yeast rice)	MOL000098	quercetin	protein tyrosine kinase 2	PTK2	Q05397	pubchem
Danshen (Radix Salviae)	MOL007088	cryptotanshinone	protein tyrosine phosphatase nonreceptor type 1	PTPN1	P18031	pubchem
Hongqu (red yeast rice)	MOL000702	Guaijaverin	protein tyrosine phosphatase non-receptor type 1	PTPN1	P18031	pubchem
Danshen (Radix Salviae)	MOL007088	cryptotanshinone	protein tyrosine phosphatase nonreceptor type 11	PTPN11	Q06124	pubchem
Danshen (Radix Salviae)	MOL007101	dihydrotanshinoneⅠ	protein tyrosine phosphatase nonreceptor type 11	PTPN11	Q06124	pubchem
Danshen (Radix Salviae)	MOL007156	tanshinone Ⅵ	protein tyrosine phosphatase non-receptor type 11	PTPN11	Q06124	pubchem
Danshen (Radix Salviae)	MOL007154	tanshinone iia	protein tyrosine phosphatase non-receptor type 11	PTPN11	Q06124	pubchem
Danshen (Radix Salviae)	MOL007088	cryptotanshinone	Protein-tyrosine phosphatase 1C	PTPN6	P29350	pubchem
Danshen (Radix Salviae)	MOL007101	dihydrotanshinoneⅠ	Protein-tyrosine phosphatase 1C	PTPN6	P29350	pubchem
Danshen (Radix Salviae)	MOL007156	tanshinone Ⅵ	Protein-tyrosine phosphatase 1C	PTPN6	P29350	pubchem
Danshen (Radix Salviae)	MOL007154	tanshinone iia	Protein-tyrosine phosphatase 1C	PTPN6	P29350	pubchem
Danshen (Radix Salviae)	MOL007088	cryptotanshinone	protein tyrosine phosphatase receptor type C	PTPRC	P08575	pubchem
Danshen (Radix Salviae)	MOL007088	cryptotanshinone	Receptor-type tyrosine-protein phosphatase F (LAR)	PTPRF	P10586	pubchem
Zhimu (Anemarrhenae Rhizoma)	MOL000422	kaempferol	protein tyrosine phosphatase receptor type S	PTPRS	Q13332	pubchem
Luhui (Aloe vera)	MOL000098	quercetin	glycogen phosphorylase L	PYGL	P06737	pubchem
Huanglian (Coptidis Rhizoma)	MOL000098	quercetin	glycogen phosphorylase L	PYGL	P06737	pubchem
Hongqu (red yeast rice)	MOL000098	quercetin	glycogen phosphorylase L	PYGL	P06737	pubchem
Zhimu (Anemarrhenae Rhizoma)	MOL000422	kaempferol	Rac GTPase activating protein 1	RACGAP1	Q9H0H5	pubchem
Danshen (Radix Salviae)	MOL000006	luteolin	Rac GTPase activating protein 1	RACGAP1	Q9H0H5	pubchem
Luhui (Aloe vera)	MOL000471	aloe-emodin	RAN, member RAS oncogene family	RAN	P62826	pubchem
Huanglian (Coptidis Rhizoma)	MOL002897	epiberberine	RAN, member RAS oncogene family	RAN	P62826	pubchem
Zhimu (Anemarrhenae Rhizoma)	MOL000422	kaempferol	RAN, member RAS oncogene family	RAN	P62826	pubchem
Danshen (Radix Salviae)	MOL000006	luteolin	RAN, member RAS oncogene family	RAN	P62826	pubchem
Danshen (Radix Salviae)	MOL007088	cryptotanshinone	Rap guanine nucleotide exchange factor 3	RAPGEF3	O95398	pubchem
Huanglian (Coptidis Rhizoma)	MOL002897	epiberberine	Rap guanine nucleotide exchange factor 3	RAPGEF3	O95398	pubchem
Danshen (Radix Salviae)	MOL000006	luteolin	Rap guanine nucleotide exchange factor 3	RAPGEF3	O95398	pubchem
Danshen (Radix Salviae)	MOL007156	tanshinone Ⅵ	Rap guanine nucleotide exchange factor 3	RAPGEF3	O95398	pubchem
Danshen (Radix Salviae)	MOL007154	tanshinone iia	Rap guanine nucleotide exchange factor 3	RAPGEF3	O95398	pubchem
Huanglian (Coptidis Rhizoma)	MOL002897	epiberberine	Rap guanine nucleotide exchange factor 4	RAPGEF4	Q8WZA2	pubchem
Luhui (Aloe vera)	MOL002773	beta-carotene	Retinoic acid receptor alpha	RARA	P10276	pubchem
Luhui (Aloe vera)	MOL000471	aloe-emodin	Retinoic acid receptor alpha	RARA	P10276	pubchem
Zhimu (Anemarrhenae Rhizoma)	MOL000422	kaempferol	Retinoic acid receptor alpha	RARA	P10276	pubchem
Luhui (Aloe vera)	MOL000098	quercetin	Retinoic acid receptor alpha	RARA	P10276	pubchem
Huanglian (Coptidis Rhizoma)	MOL000098	quercetin	Retinoic acid receptor alpha	RARA	P10276	pubchem
Hongqu (red yeast rice)	MOL000098	quercetin	Retinoic acid receptor alpha	RARA	P10276	pubchem
Danshen (Radix Salviae)	MOL007077	sclareol	Retinoic acid receptor alpha	RARA	P10276	pubchem
Danshen (Radix Salviae)	MOL007152	Przewaquinone E	RB binding protein 4, chromatin remodeling factor	RBBP4	Q09028	pubchem
Danshen (Radix Salviae)	MOL007152	Przewaquinone E	RB binding protein 7, chromatin remodeling factor	RBBP7	Q16576	pubchem
Huanglian (Coptidis Rhizoma)	MOL002897	epiberberine	RB binding protein 8, endonuclease	RBBP8	Q99708	pubchem
Danshen (Radix Salviae)	MOL000006	luteolin	RB binding protein 8, endonuclease	RBBP8	Q99708	pubchem
Luhui (Aloe vera)	MOL001439	arachidonic acid	Nuclear factor NF-kappa-B p65 subunit	RELA	Q04206	pubchem
Luhui (Aloe vera)	MOL002773	beta-carotene	Nuclear factor NF-kappa-B p65 subunit	RELA	Q04206	pubchem
Zhimu (Anemarrhenae Rhizoma)	MOL000422	kaempferol	Nuclear factor NF-kappa-B p65 subunit	RELA	Q04206	pubchem
Danshen (Radix Salviae)	MOL000006	luteolin	Nuclear factor NF-kappa-B p65 subunit	RELA	Q04206	pubchem
Luhui (Aloe vera)	MOL000098	quercetin	Nuclear factor NF-kappa-B p65 subunit	RELA	Q04206	pubchem
Huanglian (Coptidis Rhizoma)	MOL000098	quercetin	Nuclear factor NF-kappa-B p65 subunit	RELA	Q04206	pubchem
Hongqu (red yeast rice)	MOL000098	quercetin	Nuclear factor NF-kappa-B p65 subunit	RELA	Q04206	pubchem
Luhui (Aloe vera)	MOL001439	arachidonic acid	Resistin	RETN	Q9HD89	pubchem
Danshen (Radix Salviae)	MOL001942	isoimperatorin	regulator of G protein signaling 19	RGS19	P49795	pubchem
Huanglian (Coptidis Rhizoma)	MOL002897	epiberberine	regulator of G protein signaling 19	RGS19	P49795	pubchem
Beiwuweizi (Schisandrae Chinensis Fructus)	MOL008968	Gomisin-A	regulator of G protein signaling 19	RGS19	P49795	pubchem
Danshen (Radix Salviae)	MOL000006	luteolin	regulator of G protein signaling 19	RGS19	P49795	pubchem
Danshen (Radix Salviae)	MOL007156	tanshinone Ⅵ	regulator of G protein signaling 19	RGS19	P49795	pubchem
Danshen (Radix Salviae)	MOL007154	tanshinone iia	regulator of G protein signaling 19	RGS19	P49795	pubchem
Luhui (Aloe vera)	MOL000098	quercetin	regulator of G protein signaling 4	RGS4	P49798	pubchem
Huanglian (Coptidis Rhizoma)	MOL000098	quercetin	regulator of G protein signaling 4	RGS4	P49798	pubchem
Hongqu (red yeast rice)	MOL000098	quercetin	regulator of G protein signaling 4	RGS4	P49798	pubchem
Danshen (Radix Salviae)	MOL007156	tanshinone Ⅵ	regulator of G protein signaling 4	RGS4	P49798	pubchem
Danshen (Radix Salviae)	MOL007154	tanshinone iia	regulator of G protein signaling 4	RGS4	P49798	pubchem
Danshen (Radix Salviae)	MOL000006	luteolin	HTRA1 protein	RGS7	Q05DJ8	pubchem
Beiwuweizi (Schisandrae Chinensis Fructus)	MOL008968	Gomisin-A	regulator of G protein signaling 7	RGS7	P49802	pubchem
Danshen (Radix Salviae)	MOL000006	luteolin	regulator of G protein signaling 7	RGS7	P49802	pubchem
Luhui (Aloe vera)	MOL000098	quercetin	RIO kinase 2	RIOK2	Q9BVS4	pubchem
Huanglian (Coptidis Rhizoma)	MOL000098	quercetin	RIO kinase 2	RIOK2	Q9BVS4	pubchem
Hongqu (red yeast rice)	MOL000098	quercetin	RIO kinase 2	RIOK2	Q9BVS4	pubchem
Luhui (Aloe vera)	MOL000098	quercetin	ribonuclease H1	RNASEH1	O60930	pubchem
Huanglian (Coptidis Rhizoma)	MOL000098	quercetin	ribonuclease H1	RNASEH1	O60930	pubchem
Hongqu (red yeast rice)	MOL000098	quercetin	ribonuclease H1	RNASEH1	O60930	pubchem
Zhimu (Anemarrhenae Rhizoma)	MOL000422	kaempferol	Nuclear receptor ROR-gamma	RORC	P51449	pubchem
Luhui (Aloe vera)	MOL000098	quercetin	ribosomal protein S6 kinase A3	RPS6KA3	P51812	pubchem
Huanglian (Coptidis Rhizoma)	MOL000098	quercetin	ribosomal protein S6 kinase A3	RPS6KA3	P51812	pubchem
Hongqu (red yeast rice)	MOL000098	quercetin	ribosomal protein S6 kinase A3	RPS6KA3	P51812	pubchem
Luhui (Aloe vera)	MOL000098	quercetin	ribosomal protein S6 kinase A5	RPS6KA5	O75582	pubchem
Huanglian (Coptidis Rhizoma)	MOL000098	quercetin	ribosomal protein S6 kinase A5	RPS6KA5	O75582	pubchem
Hongqu (red yeast rice)	MOL000098	quercetin	ribosomal protein S6 kinase A5	RPS6KA5	O75582	pubchem
Luhui (Aloe vera)	MOL000098	quercetin	Ribosomal protein S6 kinase 1	RPS6KB1	P23443	pubchem
Huanglian (Coptidis Rhizoma)	MOL000098	quercetin	Ribosomal protein S6 kinase 1	RPS6KB1	P23443	pubchem
Hongqu (red yeast rice)	MOL000098	quercetin	Ribosomal protein S6 kinase 1	RPS6KB1	P23443	pubchem
Luhui (Aloe vera)	MOL002773	beta-carotene	Runt-related transcription factor 1	RUNX1	Q01196	pubchem
Luhui (Aloe vera)	MOL000471	aloe-emodin	Retinoid X receptor alpha	RXRA	P19793	pubchem
Zhimu (Anemarrhenae Rhizoma)	MOL000422	kaempferol	Retinoid X receptor alpha	RXRA	P19793	pubchem
Luhui (Aloe vera)	MOL000098	quercetin	Retinoid X receptor alpha	RXRA	P19793	pubchem
Huanglian (Coptidis Rhizoma)	MOL000098	quercetin	Retinoid X receptor alpha	RXRA	P19793	pubchem
Hongqu (red yeast rice)	MOL000098	quercetin	Retinoid X receptor alpha	RXRA	P19793	pubchem
Danshen (Radix Salviae)	MOL007077	sclareol	Retinoid X receptor alpha	RXRA	P19793	pubchem
Huanglian (Coptidis Rhizoma)	MOL002897	epiberberine	SUMO1 activating enzyme subunit 1	SAE1	Q9UBE0	pubchem
Luhui (Aloe vera)	MOL001439	arachidonic acid	P-selectin	SELP	P16109	pubchem
Huanglian (Coptidis Rhizoma)	MOL002897	epiberberine	SUMO specific peptidase 6	SENP6	Q9GZR1	pubchem
Danshen (Radix Salviae)	MOL007156	tanshinone Ⅵ	SUMO peptidase family member, NEDD8 specific	SENP8	Q96LD8	pubchem
Danshen (Radix Salviae)	MOL007154	tanshinone iia	SUMO peptidase family member, NEDD8 specific	SENP8	Q96LD8	pubchem
Luhui (Aloe vera)	MOL000098	quercetin	serum/glucocorticoid regulated kinase 1	SGK1	O00141	pubchem
Huanglian (Coptidis Rhizoma)	MOL000098	quercetin	serum/glucocorticoid regulated kinase 1	SGK1	O00141	pubchem
Hongqu (red yeast rice)	MOL000098	quercetin	serum/glucocorticoid regulated kinase 1	SGK1	O00141	pubchem
Zhimu (Anemarrhenae Rhizoma)	MOL000422	kaempferol	sialic acid acetylesterase	SIAE	Q9HAT2	pubchem
Luhui (Aloe vera)	MOL000098	quercetin	signal regulatory protein alpha	SIRPA	P78324	pubchem
Huanglian (Coptidis Rhizoma)	MOL000098	quercetin	signal regulatory protein alpha	SIRPA	P78324	pubchem
Hongqu (red yeast rice)	MOL000098	quercetin	signal regulatory protein alpha	SIRPA	P78324	pubchem
Hongqu (red yeast rice)	MOL007475	Ginsenoside f2	sirtuin 1	SIRT1	Q96EB6	pubchem
Danshen (Radix Salviae)	MOL000006	luteolin	SIX homeobox 1	SIX1	Q15475	pubchem
Luhui (Aloe vera)	MOL001439	arachidonic acid	solute carrier organic anion transporter family member 1B1	SLCO1B1	Q9Y6L6	pubchem
Huanglian (Coptidis Rhizoma)	MOL001454	berberine	solute carrier organic anion transporter family member 1B1	SLCO1B1	Q9Y6L6	pubchem
Luhui (Aloe vera)	MOL002773	beta-carotene	solute carrier organic anion transporter family member 1B1	SLCO1B1	Q9Y6L6	pubchem
Huanglian (Coptidis Rhizoma)	MOL000358	beta-sitosterol	solute carrier organic anion transporter family member 1B1	SLCO1B1	Q9Y6L6	pubchem
Huanglian (Coptidis Rhizoma)	MOL000785	palmatine	solute carrier organic anion transporter family member 1B1	SLCO1B1	Q9Y6L6	pubchem
Luhui (Aloe vera)	MOL000098	quercetin	solute carrier organic anion transporter family member 1B1	SLCO1B1	Q9Y6L6	pubchem
Huanglian (Coptidis Rhizoma)	MOL000098	quercetin	solute carrier organic anion transporter family member 1B1	SLCO1B1	Q9Y6L6	pubchem
Hongqu (red yeast rice)	MOL000098	quercetin	solute carrier organic anion transporter family member 1B1	SLCO1B1	Q9Y6L6	pubchem
Luhui (Aloe vera)	MOL000359	sitosterol	solute carrier organic anion transporter family member 1B1	SLCO1B1	Q9Y6L6	pubchem
Zhimu (Anemarrhenae Rhizoma)	MOL000449	Stigmasterol	solute carrier organic anion transporter family member 1B1	SLCO1B1	Q9Y6L6	pubchem
Hongqu (red yeast rice)	MOL000449	Stigmasterol	solute carrier organic anion transporter family member 1B1	SLCO1B1	Q9Y6L6	pubchem
Danshen (Radix Salviae)	MOL006824	α-amyrin	solute carrier organic anion transporter family member 1B1	SLCO1B1	Q9Y6L6	pubchem
Luhui (Aloe vera)	MOL001439	arachidonic acid	solute carrier organic anion transporter family member 1B3	SLCO1B3	Q9NPD5	pubchem
Huanglian (Coptidis Rhizoma)	MOL001454	berberine	solute carrier organic anion transporter family member 1B3	SLCO1B3	Q9NPD5	pubchem
Luhui (Aloe vera)	MOL002773	beta-carotene	solute carrier organic anion transporter family member 1B3	SLCO1B3	Q9NPD5	pubchem
Huanglian (Coptidis Rhizoma)	MOL000358	beta-sitosterol	solute carrier organic anion transporter family member 1B3	SLCO1B3	Q9NPD5	pubchem
Huanglian (Coptidis Rhizoma)	MOL000785	palmatine	solute carrier organic anion transporter family member 1B3	SLCO1B3	Q9NPD5	pubchem
Luhui (Aloe vera)	MOL000098	quercetin	solute carrier organic anion transporter family member 1B3	SLCO1B3	Q9NPD5	pubchem
Huanglian (Coptidis Rhizoma)	MOL000098	quercetin	solute carrier organic anion transporter family member 1B3	SLCO1B3	Q9NPD5	pubchem
Hongqu (red yeast rice)	MOL000098	quercetin	solute carrier organic anion transporter family member 1B3	SLCO1B3	Q9NPD5	pubchem
Luhui (Aloe vera)	MOL000359	sitosterol	solute carrier organic anion transporter family member 1B3	SLCO1B3	Q9NPD5	pubchem
Zhimu (Anemarrhenae Rhizoma)	MOL000449	Stigmasterol	solute carrier organic anion transporter family member 1B3	SLCO1B3	Q9NPD5	pubchem
Hongqu (red yeast rice)	MOL000449	Stigmasterol	solute carrier organic anion transporter family member 1B3	SLCO1B3	Q9NPD5	pubchem
Danshen (Radix Salviae)	MOL006824	α-amyrin	solute carrier organic anion transporter family member 1B3	SLCO1B3	Q9NPD5	pubchem
Huanglian (Coptidis Rhizoma)	MOL001454	berberine	solute carrier organic anion transporter family member 2B1	SLCO2B1	O94956	pubchem
Luhui (Aloe vera)	MOL000098	quercetin	solute carrier organic anion transporter family member 2B1	SLCO2B1	O94956	pubchem
Huanglian (Coptidis Rhizoma)	MOL000098	quercetin	solute carrier organic anion transporter family member 2B1	SLCO2B1	O94956	pubchem
Hongqu (red yeast rice)	MOL000098	quercetin	solute carrier organic anion transporter family member 2B1	SLCO2B1	O94956	pubchem
Luhui (Aloe vera)	MOL000098	quercetin	STE20 like kinase	SLK	Q9H2G2	pubchem
Huanglian (Coptidis Rhizoma)	MOL000098	quercetin	STE20 like kinase	SLK	Q9H2G2	pubchem
Hongqu (red yeast rice)	MOL000098	quercetin	STE20 like kinase	SLK	Q9H2G2	pubchem
Danshen (Radix Salviae)	MOL007077	sclareol	SMAD family member 2	SMAD2	Q15796	pubchem
Luhui (Aloe vera)	MOL000098	quercetin	SMAD family member 2	SMAD2	Q15796	pubchem
Huanglian (Coptidis Rhizoma)	MOL000098	quercetin	SMAD family member 2	SMAD2	Q15796	pubchem
Hongqu (red yeast rice)	MOL000098	quercetin	SMAD family member 2	SMAD2	Q15796	pubchem
Danshen (Radix Salviae)	MOL007077	sclareol	SMAD family member 3	SMAD3	P84022	pubchem
Huanglian (Coptidis Rhizoma)	MOL002903	(R)-Canadine	SMAD family member 3	SMAD3	P84022	pubchem
Danshen (Radix Salviae)	MOL007088	cryptotanshinone	SMAD family member 3	SMAD3	P84022	pubchem
Danshen (Radix Salviae)	MOL000006	luteolin	SMAD family member 3	SMAD3	P84022	pubchem
Luhui (Aloe vera)	MOL000098	quercetin	SMAD family member 3	SMAD3	P84022	pubchem
Huanglian (Coptidis Rhizoma)	MOL000098	quercetin	SMAD family member 3	SMAD3	P84022	pubchem
Hongqu (red yeast rice)	MOL000098	quercetin	SMAD family member 3	SMAD3	P84022	pubchem
Danshen (Radix Salviae)	MOL007077	sclareol	SMAD family member 3	SMAD3	P84022	pubchem
Danshen (Radix Salviae)	MOL007156	tanshinone Ⅵ	SMAD family member 3	SMAD3	P84022	pubchem
Danshen (Radix Salviae)	MOL007154	tanshinone iia	SMAD family member 3	SMAD3	P84022	pubchem
Danshen (Radix Salviae)	MOL000006	luteolin	survival of motor neuron 2, centromeric	SMN2	Q16637	pubchem
Danshen (Radix Salviae)	MOL007154	tanshinone iia	sphingomyelin phosphodiesterase 1	SMPD1	P17405	pubchem
Huanglian (Coptidis Rhizoma)	MOL002903	(R)-Canadine	sphingomyelin phosphodiesterase 1	SMPD1	P17405	pubchem
Luhui (Aloe vera)	MOL000471	aloe-emodin	sphingomyelin phosphodiesterase 1	SMPD1	P17405	pubchem
Huanglian (Coptidis Rhizoma)	MOL002894	berberrubine	sphingomyelin phosphodiesterase 1	SMPD1	P17405	pubchem
Huanglian (Coptidis Rhizoma)	MOL002897	epiberberine	sphingomyelin phosphodiesterase 1	SMPD1	P17405	pubchem
Beiwuweizi (Schisandrae Chinensis Fructus)	MOL008968	Gomisin-A	sphingomyelin phosphodiesterase 1	SMPD1	P17405	pubchem
Zhimu (Anemarrhenae Rhizoma)	MOL000422	kaempferol	sphingomyelin phosphodiesterase 1	SMPD1	P17405	pubchem
Luhui (Aloe vera)	MOL000098	quercetin	sphingomyelin phosphodiesterase 1	SMPD1	P17405	pubchem
Huanglian (Coptidis Rhizoma)	MOL000098	quercetin	sphingomyelin phosphodiesterase 1	SMPD1	P17405	pubchem
Hongqu (red yeast rice)	MOL000098	quercetin	sphingomyelin phosphodiesterase 1	SMPD1	P17405	pubchem
Luhui (Aloe vera)	MOL000471	aloe-emodin	snurportin 1	SNUPN	O95149	pubchem
Huanglian (Coptidis Rhizoma)	MOL002897	epiberberine	snurportin 1	SNUPN	O95149	pubchem
Zhimu (Anemarrhenae Rhizoma)	MOL000422	kaempferol	snurportin 1	SNUPN	O95149	pubchem
Danshen (Radix Salviae)	MOL000006	luteolin	snurportin 1	SNUPN	O95149	pubchem
Luhui (Aloe vera)	MOL000098	quercetin	sorbitol dehydrogenase	SORD	Q00796	pubchem
Huanglian (Coptidis Rhizoma)	MOL000098	quercetin	sorbitol dehydrogenase	SORD	Q00796	pubchem
Hongqu (red yeast rice)	MOL000098	quercetin	sorbitol dehydrogenase	SORD	Q00796	pubchem
Luhui (Aloe vera)	MOL000098	quercetin	Tyrosine-protein kinase SRC	SRC	P12931	pubchem
Huanglian (Coptidis Rhizoma)	MOL000098	quercetin	Tyrosine-protein kinase SRC	SRC	P12931	pubchem
Hongqu (red yeast rice)	MOL000098	quercetin	Tyrosine-protein kinase SRC	SRC	P12931	pubchem
Danshen (Radix Salviae)	MOL007088	cryptotanshinone	signal transducer and activator of transcription 1	STAT1	P42224	pubchem
Luhui (Aloe vera)	MOL002773	beta-carotene	Signal transducer and activator of transcription 3	STAT3	P40763	pubchem
Danshen (Radix Salviae)	MOL007107	C09092	Signal transducer and activator of transcription 3	STAT3	P40763	pubchem
Danshen (Radix Salviae)	MOL007088	cryptotanshinone	Signal transducer and activator of transcription 3	STAT3	P40763	pubchem
Luhui (Aloe vera)	MOL000098	quercetin	signal transducer and activator of transcription 6	STAT6	P42226	pubchem
Huanglian (Coptidis Rhizoma)	MOL000098	quercetin	signal transducer and activator of transcription 6	STAT6	P42226	pubchem
Hongqu (red yeast rice)	MOL000098	quercetin	signal transducer and activator of transcription 6	STAT6	P42226	pubchem
Luhui (Aloe vera)	MOL000098	quercetin	serine/threonine kinase 10	STK10	O94804	pubchem
Huanglian (Coptidis Rhizoma)	MOL000098	quercetin	serine/threonine kinase 10	STK10	O94804	pubchem
Hongqu (red yeast rice)	MOL000098	quercetin	serine/threonine kinase 10	STK10	O94804	pubchem
Zhimu (Anemarrhenae Rhizoma)	MOL000422	kaempferol	serine/threonine kinase 16	STK16	O75716	pubchem
Danshen (Radix Salviae)	MOL000006	luteolin	serine/threonine kinase 16	STK16	O75716	pubchem
Luhui (Aloe vera)	MOL000098	quercetin	serine/threonine kinase 16	STK16	O75716	pubchem
Huanglian (Coptidis Rhizoma)	MOL000098	quercetin	serine/threonine kinase 16	STK16	O75716	pubchem
Hongqu (red yeast rice)	MOL000098	quercetin	serine/threonine kinase 16	STK16	O75716	pubchem
Luhui (Aloe vera)	MOL000098	quercetin	serine/threonine kinase 17a	STK17A	Q9UEE5	pubchem
Huanglian (Coptidis Rhizoma)	MOL000098	quercetin	serine/threonine kinase 17a	STK17A	Q9UEE5	pubchem
Hongqu (red yeast rice)	MOL000098	quercetin	serine/threonine kinase 17a	STK17A	Q9UEE5	pubchem
Luhui (Aloe vera)	MOL000098	quercetin	serine/threonine kinase 25	STK25	O00506	pubchem
Huanglian (Coptidis Rhizoma)	MOL000098	quercetin	serine/threonine kinase 25	STK25	O00506	pubchem
Hongqu (red yeast rice)	MOL000098	quercetin	serine/threonine kinase 25	STK25	O00506	pubchem
Luhui (Aloe vera)	MOL000098	quercetin	serine/threonine kinase 26	STK26	Q9P289	pubchem
Huanglian (Coptidis Rhizoma)	MOL000098	quercetin	serine/threonine kinase 26	STK26	Q9P289	pubchem
Hongqu (red yeast rice)	MOL000098	quercetin	serine/threonine kinase 26	STK26	Q9P289	pubchem
Huanglian (Coptidis Rhizoma)	MOL001454	berberine	serine/threonine kinase 33	STK33	Q9BYT3	pubchem
Danshen (Radix Salviae)	MOL007107	C09092	serine/threonine kinase 33	STK33	Q9BYT3	pubchem
Danshen (Radix Salviae)	MOL007156	tanshinone Ⅵ	serine/threonine kinase 33	STK33	Q9BYT3	pubchem
Danshen (Radix Salviae)	MOL007154	tanshinone iia	serine/threonine kinase 33	STK33	Q9BYT3	pubchem
Luhui (Aloe vera)	MOL000098	quercetin	serine/threonine kinase 38	STK38	Q15208	pubchem
Huanglian (Coptidis Rhizoma)	MOL000098	quercetin	serine/threonine kinase 38	STK38	Q15208	pubchem
Hongqu (red yeast rice)	MOL000098	quercetin	serine/threonine kinase 38	STK38	Q15208	pubchem
Luhui (Aloe vera)	MOL000098	quercetin	serine/threonine kinase 4	STK4	Q13043	pubchem
Huanglian (Coptidis Rhizoma)	MOL000098	quercetin	serine/threonine kinase 4	STK4	Q13043	pubchem
Hongqu (red yeast rice)	MOL000098	quercetin	serine/threonine kinase 4	STK4	Q13043	pubchem
Luhui (Aloe vera)	MOL000098	quercetin	sulfotransferase family 1E member 1	SULT1E1	P49888	pubchem
Huanglian (Coptidis Rhizoma)	MOL000098	quercetin	sulfotransferase family 1E member 1	SULT1E1	P49888	pubchem
Hongqu (red yeast rice)	MOL000098	quercetin	sulfotransferase family 1E member 1	SULT1E1	P49888	pubchem
Danshen (Radix Salviae)	MOL007152	Przewaquinone E	SUZ12 polycomb repressive complex 2 subunit	SUZ12	Q15022	pubchem
Danshen (Radix Salviae)	MOL007151	Tanshindiol B	SUZ12 polycomb repressive complex 2 subunit	SUZ12	Q15022	pubchem
Danshen (Radix Salviae)	MOL007156	tanshinone Ⅵ	SUZ12 polycomb repressive complex 2 subunit	SUZ12	Q15022	pubchem
Danshen (Radix Salviae)	MOL007154	tanshinone iia	SUZ12 polycomb repressive complex 2 subunit	SUZ12	Q15022	pubchem
Danshen (Radix Salviae)	MOL000006	luteolin	large T antigen (Macaca mulatta polyomavirus 1)	SV40gp6	P03070	pubchem
Danshen (Radix Salviae)	MOL007156	tanshinone Ⅵ	large T antigen (Macaca mulatta polyomavirus 1)	SV40gp6	P03070	pubchem
Danshen (Radix Salviae)	MOL007154	tanshinone iia	large T antigen (Macaca mulatta polyomavirus 1)	SV40gp6	P03070	pubchem
Danshen (Radix Salviae)	MOL000006	luteolin	Tyrosine-protein kinase SYK	SYK	P43405	pubchem
Luhui (Aloe vera)	MOL000098	quercetin	Tyrosine-protein kinase SYK	SYK	P43405	pubchem
Huanglian (Coptidis Rhizoma)	MOL000098	quercetin	Tyrosine-protein kinase SYK	SYK	P43405	pubchem
Hongqu (red yeast rice)	MOL000098	quercetin	Tyrosine-protein kinase SYK	SYK	P43405	pubchem
Danshen (Radix Salviae)	MOL001942	isoimperatorin	TAR DNA binding protein	TARDBP	Q13148	pubchem
Huanglian (Coptidis Rhizoma)	MOL002903	(R)-Canadine	tyrosyl-DNA phosphodiesterase 1	TDP1	Q9NUW8	pubchem
Luhui (Aloe vera)	MOL001439	arachidonic acid	tyrosyl-DNA phosphodiesterase 1	TDP1	Q9NUW8	pubchem
Luhui (Aloe vera)	MOL002773	beta-carotene	tyrosyl-DNA phosphodiesterase 1	TDP1	Q9NUW8	pubchem
Danshen (Radix Salviae)	MOL007088	cryptotanshinone	tyrosylDNA phosphodiesterase 1	TDP1	Q9NUW8	pubchem
Huanglian (Coptidis Rhizoma)	MOL002897	epiberberine	tyrosyl-DNA phosphodiesterase 1	TDP1	Q9NUW8	pubchem
Zhimu (Anemarrhenae Rhizoma)	MOL000422	kaempferol	tyrosyl-DNA phosphodiesterase 1	TDP1	Q9NUW8	pubchem
Kugua (Momordica charantia)	MOL010267	lycopene	tyrosyl-DNA phosphodiesterase 1	TDP1	Q9NUW8	pubchem
Luhui (Aloe vera)	MOL000098	quercetin	tyrosyl-DNA phosphodiesterase 1	TDP1	Q9NUW8	pubchem
Huanglian (Coptidis Rhizoma)	MOL000098	quercetin	tyrosyl-DNA phosphodiesterase 1	TDP1	Q9NUW8	pubchem
Hongqu (red yeast rice)	MOL000098	quercetin	tyrosyl-DNA phosphodiesterase 1	TDP1	Q9NUW8	pubchem
Danshen (Radix Salviae)	MOL007156	tanshinone Ⅵ	tyrosylDNA phosphodiesterase 1	TDP1	Q9NUW8	pubchem
Danshen (Radix Salviae)	MOL007154	tanshinone iia	tyrosylDNA phosphodiesterase 1	TDP1	Q9NUW8	pubchem
Huanglian (Coptidis Rhizoma)	MOL002897	epiberberine	tyrosyl-DNA phosphodiesterase 2	TDP2	O95551	pubchem
Huanglian (Coptidis Rhizoma)	MOL001454	berberine	telomerase reverse transcriptase	TERT	O14746	pubchem
Danshen (Radix Salviae)	MOL007156	tanshinone Ⅵ	telomerase reverse transcriptase	TERT	O14746	pubchem
Danshen (Radix Salviae)	MOL007154	tanshinone iia	telomerase reverse transcriptase	TERT	O14746	pubchem
Luhui (Aloe vera)	MOL000359	sitosterol	Transforming growth factor beta-1	TGFB1	P01137	pubchem
Luhui (Aloe vera)	MOL000098	quercetin	thrombopoietin	THPO	P40225	pubchem
Huanglian (Coptidis Rhizoma)	MOL000098	quercetin	thrombopoietin	THPO	P40225	pubchem
Hongqu (red yeast rice)	MOL000098	quercetin	thrombopoietin	THPO	P40225	pubchem
Danshen (Radix Salviae)	MOL000006	luteolin	Thyroid hormone receptor beta-1	THRB	P10828	pubchem
Luhui (Aloe vera)	MOL000098	quercetin	Thyroid hormone receptor beta-1	THRB	P10828	pubchem
Huanglian (Coptidis Rhizoma)	MOL000098	quercetin	Thyroid hormone receptor beta-1	THRB	P10828	pubchem
Hongqu (red yeast rice)	MOL000098	quercetin	Thyroid hormone receptor beta-1	THRB	P10828	pubchem
Luhui (Aloe vera)	MOL000471	aloe-emodin	Tumor necrosis factor	TNF	P01375	pubchem
Zhimu (Anemarrhenae Rhizoma)	MOL000422	kaempferol	tumor necrosis factor	TNF	P01375	pubchem
Danshen (Radix Salviae)	MOL000006	luteolin	TNF receptor superfamily member 10b	TNFRSF10B	O14763	pubchem
Luhui (Aloe vera)	MOL001439	arachidonic acid	Tumor necrosis factor receptor superfamily member 1A	TNFRSF1A	P19438	pubchem
Luhui (Aloe vera)	MOL001439	arachidonic acid	Tumor necrosis factor receptor superfamily member 1B	TNFRSF1B	P20333	pubchem
Luhui (Aloe vera)	MOL000098	quercetin	TRAF2 and NCK interacting kinase	TNIK	Q9UKE5	pubchem
Huanglian (Coptidis Rhizoma)	MOL000098	quercetin	TRAF2 and NCK interacting kinase	TNIK	Q9UKE5	pubchem
Hongqu (red yeast rice)	MOL000098	quercetin	TRAF2 and NCK interacting kinase	TNIK	Q9UKE5	pubchem
Danshen (Radix Salviae)	MOL000006	luteolin	tankyrase	TNKS	O95271	pubchem
Danshen (Radix Salviae)	MOL000006	luteolin	tankyrase 2	TNKS2	Q9H2K2	pubchem
Huanglian (Coptidis Rhizoma)	MOL002897	epiberberine	troponin C1, slow skeletal and cardiac type	TNNC1	P63316	pubchem
Huanglian (Coptidis Rhizoma)	MOL002897	epiberberine	troponin I3, cardiac type	TNNI3	P19429	pubchem
Huanglian (Coptidis Rhizoma)	MOL002897	epiberberine	troponin T2, cardiac type	TNNT2	P45379	pubchem
Hongqu (red yeast rice)	MOL007475	Ginsenoside f2	DNA topoisomerase I	TOP1	P11387	pubchem
Hongqu (red yeast rice)	MOL005327	ginsenoside Rd2_qt	DNA topoisomerase I	TOP1	P11387	pubchem
Danshen (Radix Salviae)	MOL000006	luteolin	DNA topoisomerase I	TOP1	P11387	pubchem
Luhui (Aloe vera)	MOL000098	quercetin	DNA topoisomerase I	TOP1	P11387	pubchem
Huanglian (Coptidis Rhizoma)	MOL000098	quercetin	DNA topoisomerase I	TOP1	P11387	pubchem
Hongqu (red yeast rice)	MOL000098	quercetin	DNA topoisomerase I	TOP1	P11387	pubchem
Hongqu (red yeast rice)	MOL007475	Ginsenoside f2	DNA topoisomerase II alpha	TOP2A	P11388	pubchem
Hongqu (red yeast rice)	MOL005327	ginsenoside Rd2_qt	DNA topoisomerase II alpha	TOP2A	P11388	pubchem
Zhimu (Anemarrhenae Rhizoma)	MOL000422	kaempferol	DNA topoisomerase II alpha	TOP2A	P11388	pubchem
Danshen (Radix Salviae)	MOL000006	luteolin	DNA topoisomerase II alpha	TOP2A	P11388	pubchem
Luhui (Aloe vera)	MOL000098	quercetin	DNA topoisomerase II alpha	TOP2A	P11388	pubchem
Huanglian (Coptidis Rhizoma)	MOL000098	quercetin	DNA topoisomerase II alpha	TOP2A	P11388	pubchem
Hongqu (red yeast rice)	MOL000098	quercetin	DNA topoisomerase II alpha	TOP2A	P11388	pubchem
Luhui (Aloe vera)	MOL000098	quercetin	DNA topoisomerase II beta	TOP2B	Q02880	pubchem
Huanglian (Coptidis Rhizoma)	MOL000098	quercetin	DNA topoisomerase II beta	TOP2B	Q02880	pubchem
Hongqu (red yeast rice)	MOL000098	quercetin	DNA topoisomerase II beta	TOP2B	Q02880	pubchem
Luhui (Aloe vera)	MOL000471	aloe-emodin	Cellular tumor antigen p53	TP53	P04637	pubchem
Luhui (Aloe vera)	MOL002773	beta-carotene	Cellular tumor antigen p53	TP53	P04637	pubchem
Luhui (Aloe vera)	MOL000471	aloe-emodin	tumor protein p53	TP53	P04637	pubchem
Zhimu (Anemarrhenae Rhizoma)	MOL000422	kaempferol	tumor protein p53	TP53	P04637	pubchem
Kugua (Momordica charantia)	MOL010267	lycopene	tumor protein p53	TP53	P04637	pubchem
Luhui (Aloe vera)	MOL000098	quercetin	tumor protein p53	TP53	P04637	pubchem
Huanglian (Coptidis Rhizoma)	MOL000098	quercetin	tumor protein p53	TP53	P04637	pubchem
Hongqu (red yeast rice)	MOL000098	quercetin	tumor protein p53	TP53	P04637	pubchem
Danshen (Radix Salviae)	MOL007077	sclareol	tumor protein p53	TP53	P04637	pubchem
Danshen (Radix Salviae)	MOL007156	tanshinone Ⅵ	tumor protein p53	TP53	P04637	pubchem
Danshen (Radix Salviae)	MOL007154	tanshinone iia	tumor protein p53	TP53	P04637	pubchem
Danshen (Radix Salviae)	MOL007156	tanshinone Ⅵ	T cell receptor alpha locus	TRA	A0A0B4J268	pubchem
Danshen (Radix Salviae)	MOL007154	tanshinone iia	T cell receptor alpha locus	TRA	A0A0B4J268	pubchem
Danshen (Radix Salviae)	MOL000006	luteolin	T cell receptor alpha locus	TRAV4	A0A0B4J268	pubchem
Danshen (Radix Salviae)	MOL007077	sclareol	thyrotropin releasing hormone receptor	TRHR	P34981	pubchem
Luhui (Aloe vera)	MOL001439	arachidonic acid	transient receptor potential cation channel subfamily C member 6	TRPC6	Q9Y210	pubchem
Luhui (Aloe vera)	MOL001439	arachidonic acid	transient receptor potential cation channel subfamily M member 2	TRPM2	O94759	pubchem
Huanglian (Coptidis Rhizoma)	MOL002897	epiberberine	tumor susceptibility 101	TSG101	Q99816	pubchem
Huanglian (Coptidis Rhizoma)	MOL001454	berberine	thyroid stimulating hormone receptor	TSHR	P16473	pubchem
Zhimu (Anemarrhenae Rhizoma)	MOL000422	kaempferol	thyroid stimulating hormone receptor	TSHR	P16473	pubchem
Danshen (Radix Salviae)	MOL000006	luteolin	thyroid stimulating hormone receptor	TSHR	P16473	pubchem
Luhui (Aloe vera)	MOL000098	quercetin	thyroid stimulating hormone receptor	TSHR	P16473	pubchem
Huanglian (Coptidis Rhizoma)	MOL000098	quercetin	thyroid stimulating hormone receptor	TSHR	P16473	pubchem
Hongqu (red yeast rice)	MOL000098	quercetin	thyroid stimulating hormone receptor	TSHR	P16473	pubchem
Danshen (Radix Salviae)	MOL007077	sclareol	thyroid stimulating hormone receptor	TSHR	P16473	pubchem
Danshen (Radix Salviae)	MOL000006	luteolin	Chain B, Crystal Structure Of The Wild Type Ttr Binding Luteolin (Ttrwt:lut)	TTR	P02766	pubchem
Danshen (Radix Salviae)	MOL000006	luteolin	transthyretin	TTR	P02766	pubchem
Huanglian (Coptidis Rhizoma)	MOL000358	beta-sitosterol	Tyrosinase	TYR	P14679	pubchem
Zhimu (Anemarrhenae Rhizoma)	MOL000422	kaempferol	Tyrosinase	TYR	P14679	pubchem
Danshen (Radix Salviae)	MOL000006	luteolin	Tyrosinase	TYR	P14679	pubchem
Huanglian (Coptidis Rhizoma)	MOL008647	Moupinamide	Tyrosinase	TYR	P14679	pubchem
Luhui (Aloe vera)	MOL000098	quercetin	Tyrosinase	TYR	P14679	pubchem
Huanglian (Coptidis Rhizoma)	MOL000098	quercetin	Tyrosinase	TYR	P14679	pubchem
Hongqu (red yeast rice)	MOL000098	quercetin	Tyrosinase	TYR	P14679	pubchem
Luhui (Aloe vera)	MOL000359	sitosterol	Tyrosinase	TYR	P14679	pubchem
Huanglian (Coptidis Rhizoma)	MOL002897	epiberberine	ubiquitin like modifier activating enzyme 2	UBA2	Q9UBT2	pubchem
Huanglian (Coptidis Rhizoma)	MOL002897	epiberberine	ubiquitin conjugating enzyme E2 I	UBE2I	P63279	pubchem
Danshen (Radix Salviae)	MOL007088	cryptotanshinone	ubiquitin Cterminal hydrolase L5	UCHL5	Q9Y5K5	pubchem
Luhui (Aloe vera)	MOL001439	arachidonic acid	Mitochondrial uncoupling protein 2	UCP2	P55851	pubchem
Luhui (Aloe vera)	MOL000098	quercetin	UDP glucuronosyltransferase family 1 member A1	UGT1A1	P22309	pubchem
Huanglian (Coptidis Rhizoma)	MOL000098	quercetin	UDP glucuronosyltransferase family 1 member A1	UGT1A1	P22309	pubchem
Hongqu (red yeast rice)	MOL000098	quercetin	UDP glucuronosyltransferase family 1 member A1	UGT1A1	P22309	pubchem
Luhui (Aloe vera)	MOL000098	quercetin	UDP glucuronosyltransferase family 1 member A10	UGT1A10	Q9HAW8	pubchem
Huanglian (Coptidis Rhizoma)	MOL000098	quercetin	UDP glucuronosyltransferase family 1 member A10	UGT1A10	Q9HAW8	pubchem
Hongqu (red yeast rice)	MOL000098	quercetin	UDP glucuronosyltransferase family 1 member A10	UGT1A10	Q9HAW8	pubchem
Luhui (Aloe vera)	MOL000098	quercetin	UDP glucuronosyltransferase family 1 member A3	UGT1A3	P35503	pubchem
Huanglian (Coptidis Rhizoma)	MOL000098	quercetin	UDP glucuronosyltransferase family 1 member A3	UGT1A3	P35503	pubchem
Hongqu (red yeast rice)	MOL000098	quercetin	UDP glucuronosyltransferase family 1 member A3	UGT1A3	P35503	pubchem
Luhui (Aloe vera)	MOL000098	quercetin	UDP glucuronosyltransferase family 1 member A4	UGT1A4	P22310	pubchem
Huanglian (Coptidis Rhizoma)	MOL000098	quercetin	UDP glucuronosyltransferase family 1 member A4	UGT1A4	P22310	pubchem
Hongqu (red yeast rice)	MOL000098	quercetin	UDP glucuronosyltransferase family 1 member A4	UGT1A4	P22310	pubchem
Luhui (Aloe vera)	MOL000098	quercetin	UDP glucuronosyltransferase family 1 member A6	UGT1A6	P19224	pubchem
Huanglian (Coptidis Rhizoma)	MOL000098	quercetin	UDP glucuronosyltransferase family 1 member A6	UGT1A6	P19224	pubchem
Hongqu (red yeast rice)	MOL000098	quercetin	UDP glucuronosyltransferase family 1 member A6	UGT1A6	P19224	pubchem
Luhui (Aloe vera)	MOL000098	quercetin	UDP glucuronosyltransferase family 1 member A8	UGT1A8	Q9HAW9	pubchem
Huanglian (Coptidis Rhizoma)	MOL000098	quercetin	UDP glucuronosyltransferase family 1 member A8	UGT1A8	Q9HAW9	pubchem
Hongqu (red yeast rice)	MOL000098	quercetin	UDP glucuronosyltransferase family 1 member A8	UGT1A8	Q9HAW9	pubchem
Luhui (Aloe vera)	MOL000098	quercetin	UDP glucuronosyltransferase family 1 member A9	UGT1A9	O60656	pubchem
Huanglian (Coptidis Rhizoma)	MOL000098	quercetin	UDP glucuronosyltransferase family 1 member A9	UGT1A9	O60656	pubchem
Hongqu (red yeast rice)	MOL000098	quercetin	UDP glucuronosyltransferase family 1 member A9	UGT1A9	O60656	pubchem
Luhui (Aloe vera)	MOL000098	quercetin	UDP glucuronosyltransferase family 2 member B15	UGT2B15	P54855	pubchem
Huanglian (Coptidis Rhizoma)	MOL000098	quercetin	UDP glucuronosyltransferase family 2 member B15	UGT2B15	P54855	pubchem
Hongqu (red yeast rice)	MOL000098	quercetin	UDP glucuronosyltransferase family 2 member B15	UGT2B15	P54855	pubchem
Huanglian (Coptidis Rhizoma)	MOL002903	(R)-Canadine	ubiquitin specific peptidase 1	USP1	O94782	pubchem
Luhui (Aloe vera)	MOL001439	arachidonic acid	ubiquitin specific peptidase 1	USP1	O94782	pubchem
Danshen (Radix Salviae)	MOL007088	cryptotanshinone	Ubiquitin carboxyl-terminal hydrolase 1	USP1	O94782	pubchem
Huanglian (Coptidis Rhizoma)	MOL002897	epiberberine	ubiquitin specific peptidase 1	USP1	O94782	pubchem
Kugua (Momordica charantia)	MOL010267	lycopene	ubiquitin specific peptidase 1	USP1	O94782	pubchem
Luhui (Aloe vera)	MOL000098	quercetin	ubiquitin specific peptidase 1	USP1	O94783	pubchem
Huanglian (Coptidis Rhizoma)	MOL000098	quercetin	ubiquitin specific peptidase 1	USP1	O94783	pubchem
Hongqu (red yeast rice)	MOL000098	quercetin	ubiquitin specific peptidase 1	USP1	O94783	pubchem
Danshen (Radix Salviae)	MOL007156	tanshinone Ⅵ	Ubiquitin carboxyl-terminal hydrolase 1	USP1	O94782	pubchem
Danshen (Radix Salviae)	MOL007154	tanshinone iia	Ubiquitin carboxyl-terminal hydrolase 1	USP1	O94782	pubchem
Luhui (Aloe vera)	MOL000098	quercetin	ubiquitin specific peptidase 2	USP2	O75604	pubchem
Huanglian (Coptidis Rhizoma)	MOL000098	quercetin	ubiquitin specific peptidase 2	USP2	O75604	pubchem
Hongqu (red yeast rice)	MOL000098	quercetin	ubiquitin specific peptidase 2	USP2	O75604	pubchem
Danshen (Radix Salviae)	MOL007156	tanshinone Ⅵ	Ankyrin repeat protein B19	VACWR199	Q01222	pubchem
Danshen (Radix Salviae)	MOL007154	tanshinone iia	Ankyrin repeat protein B19	VACWR199	Q01222	pubchem
Luhui (Aloe vera)	MOL001439	arachidonic acid	Vitamin D receptor	VDR	P11473	pubchem
Danshen (Radix Salviae)	MOL007088	cryptotanshinone	Vitamin D receptor	VDR	P11473	pubchem
Danshen (Radix Salviae)	MOL007101	dihydrotanshinoneⅠ	Vitamin D receptor	VDR	P11473	pubchem
Kugua (Momordica charantia)	MOL010267	lycopene	Vitamin D receptor	VDR	P11473	pubchem
Danshen (Radix Salviae)	MOL007077	sclareol	vitamin D receptor	VDR	BAH02291	pubchem
Danshen (Radix Salviae)	MOL007156	tanshinone Ⅵ	Vitamin D receptor	VDR	P11473	pubchem
Danshen (Radix Salviae)	MOL007154	tanshinone iia	Vitamin D receptor	VDR	P11473	pubchem
Luhui (Aloe vera)	MOL002773	beta-carotene	Vascular endothelial growth factor A	VEGFA	P15692	pubchem
Luhui (Aloe vera)	MOL000098	quercetin	VRK serine/threonine kinase 1	VRK1	Q99986	pubchem
Huanglian (Coptidis Rhizoma)	MOL000098	quercetin	VRK serine/threonine kinase 1	VRK1	Q99986	pubchem
Hongqu (red yeast rice)	MOL000098	quercetin	VRK serine/threonine kinase 1	VRK1	Q99986	pubchem
Luhui (Aloe vera)	MOL000098	quercetin	VRK serine/threonine kinase 2	VRK2	Q86Y07	pubchem
Huanglian (Coptidis Rhizoma)	MOL000098	quercetin	VRK serine/threonine kinase 2	VRK2	Q86Y07	pubchem
Hongqu (red yeast rice)	MOL000098	quercetin	VRK serine/threonine kinase 2	VRK2	Q86Y07	pubchem
Luhui (Aloe vera)	MOL000098	quercetin	VRK serine/threonine kinase 3	VRK3	Q8IV63	pubchem
Huanglian (Coptidis Rhizoma)	MOL000098	quercetin	VRK serine/threonine kinase 3	VRK3	Q8IV63	pubchem
Hongqu (red yeast rice)	MOL000098	quercetin	VRK serine/threonine kinase 3	VRK3	Q8IV63	pubchem
Danshen (Radix Salviae)	MOL000006	luteolin	Werner syndrome RecQ like helicase	WRN	Q14191	pubchem
Zhimu (Anemarrhenae Rhizoma)	MOL000422	kaempferol	Xanthine dehydrogenase	XDH	P47989	pubchem
Danshen (Radix Salviae)	MOL000006	luteolin	Xanthine dehydrogenase	XDH	P47989	pubchem
Luhui (Aloe vera)	MOL000098	quercetin	Xanthine dehydrogenase	XDH	P47989	pubchem
Huanglian (Coptidis Rhizoma)	MOL000098	quercetin	Xanthine dehydrogenase	XDH	P47989	pubchem
Hongqu (red yeast rice)	MOL000098	quercetin	Xanthine dehydrogenase	XDH	P47989	pubchem
Zhimu (Anemarrhenae Rhizoma)	MOL000422	kaempferol	X-linked inhibitor of apoptosis	XIAP	P98170	pubchem
Huanglian (Coptidis Rhizoma)	MOL001454	berberine	Yes associated protein 1	YAP1	P46937	pubchem
Luhui (Aloe vera)	MOL000098	quercetin	YES proto-oncogene 1, Src family tyrosine kinase	YES1	P07947	pubchem
Huanglian (Coptidis Rhizoma)	MOL000098	quercetin	YES proto-oncogene 1, Src family tyrosine kinase	YES1	P07947	pubchem
Hongqu (red yeast rice)	MOL000098	quercetin	YES proto-oncogene 1, Src family tyrosine kinase	YES1	P07947	pubchem
Luhui (Aloe vera)	MOL000098	quercetin	tyrosine 3-monooxygenase/tryptophan 5-monooxygenase activation protein beta	YWHAB	P31946	pubchem
Huanglian (Coptidis Rhizoma)	MOL000098	quercetin	tyrosine 3-monooxygenase/tryptophan 5-monooxygenase activation protein beta	YWHAB	P31946	pubchem
Hongqu (red yeast rice)	MOL000098	quercetin	tyrosine 3-monooxygenase/tryptophan 5-monooxygenase activation protein beta	YWHAB	P31946	pubchem
Danshen (Radix Salviae)	MOL001601	1,2,5,6-tetrahydrotanshinone	Adaptor-associated kinase	AAK1	Q2M2I8	Swisstarget
Huanglian (Coptidis Rhizoma)	MOL002903	(R)-Canadine	P-glycoprotein 1	ABCB1	P08183	Swisstarget
Hongqu (red yeast rice)	MOL011455	20-Hexadecanoylingenol	P-glycoprotein 1	ABCB1	P08183	Swisstarget
Zhimu (Anemarrhenae Rhizoma)	MOL004373	Anhydroicaritin	P-glycoprotein 1	ABCB1	P08183	Swisstarget
Luhui (Aloe vera)	MOL000953	CLR	P-glycoprotein 1	ABCB1	P08183	Swisstarget
Danshen (Radix Salviae)	MOL007082	Danshenol A	P-glycoprotein 1	ABCB1	P08183	Swisstarget
Danshen (Radix Salviae)	MOL007081	Danshenol B	P-glycoprotein 1	ABCB1	P08183	Swisstarget
Danshen (Radix Salviae)	MOL007093	dan-shexinkum d	P-glycoprotein 1	ABCB1	P08183	Swisstarget
Hongqu (red yeast rice)	MOL001965	Dauricine	P-glycoprotein 1	ABCB1	P08183	Swisstarget
Beiwuweizi (Schisandrae Chinensis Fructus)	MOL008968	Gomisin-A	P-glycoprotein 1	ABCB1	P08183	Swisstarget
Danshen (Radix Salviae)	MOL007108	isocryptotanshi-none	P-glycoprotein 1	ABCB1	P08183	Swisstarget
Zhimu (Anemarrhenae Rhizoma)	MOL000422	kaempferol	P-glycoprotein 1	ABCB1	P08183	Swisstarget
Danshen (Radix Salviae)	MOL000006	luteolin	P-glycoprotein 1	ABCB1	P08183	Swisstarget
Huanglian (Coptidis Rhizoma)	MOL000622	Magnograndiolide	P-glycoprotein 1	ABCB1	P08183	Swisstarget
Hongqu (red yeast rice)	MOL000098	Quercetin	P-glycoprotein 1	ABCB1	P08183	Swisstarget
Luhui (Aloe vera)	MOL000098	quercetin	P-glycoprotein 1	ABCB1	P08183	Swisstarget
Huanglian (Coptidis Rhizoma)	MOL000098	quercetin	P-glycoprotein 1	ABCB1	P08183	Swisstarget
Ganjiang (Zingiberis Rhizoma)	MOL002514	Sexangularetin	P-glycoprotein 1	ABCB1	P08183	Swisstarget
Zhimu (Anemarrhenae Rhizoma)	MOL004373	Anhydroicaritin	Multidrug resistance-associated protein 1	ABCC1	P33527	Swisstarget
Beiwuweizi (Schisandrae Chinensis Fructus)	MOL005317	Deoxyharringtonine	Multidrug resistance-associated protein 1	ABCC1	P33527	Swisstarget
Zhimu (Anemarrhenae Rhizoma)	MOL000422	kaempferol	Multidrug resistance-associated protein 1	ABCC1	P33527	Swisstarget
Danshen (Radix Salviae)	MOL000006	luteolin	Multidrug resistance-associated protein 1	ABCC1	P33527	Swisstarget
Danshen (Radix Salviae)	MOL007119	miltionone Ⅰ	Multidrug resistance-associated protein 1	ABCC1	P33527	Swisstarget
Hongqu (red yeast rice)	MOL000098	Quercetin	Multidrug resistance-associated protein 1	ABCC1	P33527	Swisstarget
Luhui (Aloe vera)	MOL000098	quercetin	Multidrug resistance-associated protein 1	ABCC1	P33527	Swisstarget
Huanglian (Coptidis Rhizoma)	MOL000098	quercetin	Multidrug resistance-associated protein 1	ABCC1	P33527	Swisstarget
Ganjiang (Zingiberis Rhizoma)	MOL002514	Sexangularetin	Multidrug resistance-associated protein 1	ABCC1	P33527	Swisstarget
Danshen (Radix Salviae)	MOL007082	Danshenol A	Sulfonylurea receptor 2	ABCC9	O60706	Swisstarget
Danshen (Radix Salviae)	MOL007081	Danshenol B	Sulfonylurea receptor 2	ABCC9	O60706	Swisstarget
Danshen (Radix Salviae)	MOL007093	dan-shexinkum d	Sulfonylurea receptor 2	ABCC9	O60706	Swisstarget
Beiwuweizi (Schisandrae Chinensis Fructus)	MOL008974	Gomisin G	Sulfonylurea receptor 2	ABCC9	O60706	Swisstarget
Beiwuweizi (Schisandrae Chinensis Fructus)	MOL008968	Gomisin-A	Sulfonylurea receptor 2	ABCC9	O60706	Swisstarget
Huanglian (Coptidis Rhizoma)	MOL000622	Magnograndiolide	Sulfonylurea receptor 2	ABCC9	O60706	Swisstarget
Huanglian (Coptidis Rhizoma)	MOL000622	Magnograndiolide	Sulfonylurea receptor 2, Kir6.2	ABCC9	O60706	Swisstarget
Danshen (Radix Salviae)	MOL007036	5,6-dihydroxy-7-isopropyl-1,1-dimethyl-2,3-dihydrophenanthren-4-one	ATP-binding cassette sub-family G member 2	ABCG2	Q9UNQ0	Swisstarget
Zhimu (Anemarrhenae Rhizoma)	MOL004373	Anhydroicaritin	ATP-binding cassette sub-family G member 2	ABCG2	Q9UNQ0	Swisstarget
Danshen (Radix Salviae)	MOL007108	isocryptotanshi-none	ATP-binding cassette sub-family G member 2	ABCG2	Q9UNQ0	Swisstarget
Zhimu (Anemarrhenae Rhizoma)	MOL000422	kaempferol	ATP-binding cassette sub-family G member 2	ABCG2	Q9UNQ0	Swisstarget
Danshen (Radix Salviae)	MOL000006	luteolin	ATP-binding cassette sub-family G member 2	ABCG2	Q9UNQ0	Swisstarget
Hongqu (red yeast rice)	MOL000098	Quercetin	ATP-binding cassette sub-family G member 2	ABCG2	Q9UNQ0	Swisstarget
Luhui (Aloe vera)	MOL000098	quercetin	ATP-binding cassette sub-family G member 2	ABCG2	Q9UNQ0	Swisstarget
Huanglian (Coptidis Rhizoma)	MOL000098	quercetin	ATP-binding cassette sub-family G member 2	ABCG2	Q9UNQ0	Swisstarget
Ganjiang (Zingiberis Rhizoma)	MOL002514	Sexangularetin	ATP-binding cassette sub-family G member 2	ABCG2	Q9UNQ0	Swisstarget
Beiwuweizi (Schisandrae Chinensis Fructus)	MOL008992	Wuweizisu C	ATP-binding cassette sub-family G member 2	ABCG2	Q9UNQ0	Swisstarget
Danshen (Radix Salviae)	MOL007088	cryptotanshinone	Monoacylglycerol lipase ABHD6	ABHD6	Q9BV23	Swisstarget
Danshen (Radix Salviae)	MOL007155	(6S)-6-(hydroxymethyl)-1,6-dimethyl-8,9-dihydro-7H-naphtho[8,7-g]benzofuran-10,11-dione	Tyrosine-protein kinase ABL	ABL1	P00519	Swisstarget
Zhimu (Anemarrhenae Rhizoma)	MOL000483	(Z)-3-(4-hydroxy-3-methoxy-phenyl)-N-[2-(4-hydroxyphenyl)ethyl]acrylamide	Tyrosine-protein kinase ABL	ABL1	P00519	Swisstarget
Danshen (Radix Salviae)	MOL001601	1,2,5,6-tetrahydrotanshinone	Tyrosine-protein kinase ABL	ABL1	P00519	Swisstarget
Ganjiang (Zingiberis Rhizoma)	MOL002464	1-Monolinolein	Tyrosine-protein kinase ABL	ABL1	P00519	Swisstarget
Beiwuweizi (Schisandrae Chinensis Fructus)	MOL008956	Angeloylgomisin O	Tyrosine-protein kinase ABL	ABL1	P00519	Swisstarget
Huanglian (Coptidis Rhizoma)	MOL001454	berberine	Tyrosine-protein kinase ABL	ABL1	P00519	Swisstarget
Huanglian (Coptidis Rhizoma)	MOL002894	berberrubine	Tyrosine-protein kinase ABL	ABL1	P00519	Swisstarget
Zhimu (Anemarrhenae Rhizoma)	MOL000631	coumaroyltyramine	Tyrosine-protein kinase ABL	ABL1	P00519	Swisstarget
Hongqu (red yeast rice)	MOL001965	Dauricine	Tyrosine-protein kinase ABL	ABL1	P00519	Swisstarget
Huanglian (Coptidis Rhizoma)	MOL002897	epiberberine	Tyrosine-protein kinase ABL	ABL1	P00519	Swisstarget
Beiwuweizi (Schisandrae Chinensis Fructus)	MOL008974	Gomisin G	Tyrosine-protein kinase ABL	ABL1	P00519	Swisstarget
Huanglian (Coptidis Rhizoma)	MOL008647	Moupinamide	Tyrosine-protein kinase ABL	ABL1	P00519	Swisstarget
Danshen (Radix Salviae)	MOL007048	(E)-3-[2-(3,4-dihydroxyphenyl)-7-hydroxy-benzofuran-4-yl]acrylic acid	Angiotensin-converting enzyme	ACE	P12821	Swisstarget
Luhui (Aloe vera)	MOL001439	arachidonic acid	Angiotensin-converting enzyme	ACE	P12821	Swisstarget
Zhimu (Anemarrhenae Rhizoma)	MOL001677	asperglaucide	Angiotensin-converting enzyme	ACE	P12821	Swisstarget
Danshen (Radix Salviae)	MOL007123	miltirone Ⅱ	Angiotensin-converting enzyme	ACE	P12821	Swisstarget
Danshen (Radix Salviae)	MOL007130	prolithospermic acid	Angiotensin-converting enzyme	ACE	P12821	Swisstarget
Danshen (Radix Salviae)	MOL007141	salvianolic acid g	Angiotensin-converting enzyme	ACE	P12821	Swisstarget
Kugua (Momordica charantia)	MOL000449	Stigmasterol	Angiotensin-converting enzyme	ACE	P12821	Swisstarget
Zhimu (Anemarrhenae Rhizoma)	MOL000483	(Z)-3-(4-hydroxy-3-methoxy-phenyl)-N-[2-(4-hydroxyphenyl)ethyl]acrylamide	Acetylcholinesterase	ACHE	P22303	Swisstarget
Danshen (Radix Salviae)	MOL007050	2-(4-hydroxy-3-methoxyphenyl)-5-(3-hydroxypropyl)-7-methoxy-3-benzofurancarboxaldehyde	Acetylcholinesterase	ACHE	P22303	Swisstarget
Danshen (Radix Salviae)	MOL007041	2-isopropyl-8-methylphenanthrene-3,4-dione	Acetylcholinesterase	ACHE	P22303	Swisstarget
Danshen (Radix Salviae)	MOL007049	4-methylenemiltirone	Acetylcholinesterase	ACHE	P22303	Swisstarget
Danshen (Radix Salviae)	MOL007036	5,6-dihydroxy-7-isopropyl-1,1-dimethyl-2,3-dihydrophenanthren-4-one	Acetylcholinesterase	ACHE	P22303	Swisstarget
Zhimu (Anemarrhenae Rhizoma)	MOL004373	Anhydroicaritin	Acetylcholinesterase	ACHE	P22303	Swisstarget
Danshen (Radix Salviae)	MOL002776	Baicalin	Acetylcholinesterase	ACHE	P22303	Swisstarget
Huanglian (Coptidis Rhizoma)	MOL001454	berberine	Acetylcholinesterase	ACHE	P22303	Swisstarget
Huanglian (Coptidis Rhizoma)	MOL002894	berberrubine	Acetylcholinesterase	ACHE	P22303	Swisstarget
Ganjiang (Zingiberis Rhizoma)	MOL000358	beta-sitosterol	Acetylcholinesterase	ACHE	P22303	Swisstarget
Huanglian (Coptidis Rhizoma)	MOL001458	coptisine	Acetylcholinesterase	ACHE	P22303	Swisstarget
Zhimu (Anemarrhenae Rhizoma)	MOL000631	coumaroyltyramine	Acetylcholinesterase	ACHE	P22303	Swisstarget
Danshen (Radix Salviae)	MOL007082	Danshenol A	Acetylcholinesterase	ACHE	P22303	Swisstarget
Danshen (Radix Salviae)	MOL007081	Danshenol B	Acetylcholinesterase	ACHE	P22303	Swisstarget
Hongqu (red yeast rice)	MOL001965	Dauricine	Acetylcholinesterase	ACHE	P22303	Swisstarget
Danshen (Radix Salviae)	MOL002651	Dehydrotanshinone II A	Acetylcholinesterase	ACHE	P22303	Swisstarget
Beiwuweizi (Schisandrae Chinensis Fructus)	MOL005317	Deoxyharringtonine	Acetylcholinesterase	ACHE	P22303	Swisstarget
Danshen (Radix Salviae)	MOL007098	deoxyneocryptotanshinone	Acetylcholinesterase	ACHE	P22303	Swisstarget
Danshen (Radix Salviae)	MOL007101	dihydrotanshinoneⅠ	Acetylcholinesterase	ACHE	P22303	Swisstarget
Huanglian (Coptidis Rhizoma)	MOL002897	epiberberine	Acetylcholinesterase	ACHE	P22303	Swisstarget
Hongqu (red yeast rice)	MOL002320	Gamma-Sitosterol	Acetylcholinesterase	ACHE	P22303	Swisstarget
Hongqu (red yeast rice)	MOL007475	Ginsenoside f2	Acetylcholinesterase	ACHE	P22303	Swisstarget
Hongqu (red yeast rice)	MOL000702	Guaijaverin	Acetylcholinesterase	ACHE	P22303	Swisstarget
Zhimu (Anemarrhenae Rhizoma)	MOL004497	Hippeastrine	Acetylcholinesterase	ACHE	P22303	Swisstarget
Danshen (Radix Salviae)	MOL007108	isocryptotanshi-none	Acetylcholinesterase	ACHE	P22303	Swisstarget
Zhimu (Anemarrhenae Rhizoma)	MOL000422	kaempferol	Acetylcholinesterase	ACHE	P22303	Swisstarget
Danshen (Radix Salviae)	MOL000006	luteolin	Acetylcholinesterase	ACHE	P22303	Swisstarget
Danshen (Radix Salviae)	MOL007115	manool	Acetylcholinesterase	ACHE	P22303	Swisstarget
Danshen (Radix Salviae)	MOL007119	miltionone Ⅰ	Acetylcholinesterase	ACHE	P22303	Swisstarget
Danshen (Radix Salviae)	MOL007120	miltionone Ⅱ	Acetylcholinesterase	ACHE	P22303	Swisstarget
Danshen (Radix Salviae)	MOL007122	Miltirone	Acetylcholinesterase	ACHE	P22303	Swisstarget
Huanglian (Coptidis Rhizoma)	MOL008647	Moupinamide	Acetylcholinesterase	ACHE	P22303	Swisstarget
Danshen (Radix Salviae)	MOL007125	neocryptotanshinone	Acetylcholinesterase	ACHE	P22303	Swisstarget
Danshen (Radix Salviae)	MOL007124	neocryptotanshinone ii	Acetylcholinesterase	ACHE	P22303	Swisstarget
Danshen (Radix Salviae)	MOL007149	NSC 122421	Acetylcholinesterase	ACHE	P22303	Swisstarget
Huanglian (Coptidis Rhizoma)	MOL013352	Obacunone	Acetylcholinesterase	ACHE	P22303	Swisstarget
Danshen (Radix Salviae)	MOL001771	poriferast-5-en-3beta-ol	Acetylcholinesterase	ACHE	P22303	Swisstarget
Danshen (Radix Salviae)	MOL001659	Poriferasterol	Acetylcholinesterase	ACHE	P22303	Swisstarget
Danshen (Radix Salviae)	MOL007064	przewalskin b	Acetylcholinesterase	ACHE	P22303	Swisstarget
Hongqu (red yeast rice)	MOL000098	Quercetin	Acetylcholinesterase	ACHE	P22303	Swisstarget
Luhui (Aloe vera)	MOL000098	quercetin	Acetylcholinesterase	ACHE	P22303	Swisstarget
Huanglian (Coptidis Rhizoma)	MOL000098	quercetin	Acetylcholinesterase	ACHE	P22303	Swisstarget
Ganjiang (Zingiberis Rhizoma)	MOL002514	Sexangularetin	Acetylcholinesterase	ACHE	P22303	Swisstarget
Ganjiang (Zingiberis Rhizoma)	MOL000359	sitosterol	Acetylcholinesterase	ACHE	P22303	Swisstarget
Luhui (Aloe vera)	MOL000359	sitosterol	Acetylcholinesterase	ACHE	P22303	Swisstarget
Hongqu (red yeast rice)	MOL000449	Stigmasterol	Acetylcholinesterase	ACHE	P22303	Swisstarget
Zhimu (Anemarrhenae Rhizoma)	MOL000449	Stigmasterol	Acetylcholinesterase	ACHE	P22303	Swisstarget
Danshen (Radix Salviae)	MOL002222	sugiol	Acetylcholinesterase	ACHE	P22303	Swisstarget
Danshen (Radix Salviae)	MOL007079	tanshinaldehyde	Acetylcholinesterase	ACHE	P22303	Swisstarget
Danshen (Radix Salviae)	MOL007154	tanshinone iia	Acetylcholinesterase	ACHE	P22303	Swisstarget
Huanglian (Coptidis Rhizoma)	MOL002668	Worenine	Acetylcholinesterase	ACHE	P22303	Swisstarget
Danshen (Radix Salviae)	MOL006824	α-amyrin	Acetylcholinesterase	ACHE	P22303	Swisstarget
Danshen (Radix Salviae)	MOL007048	(E)-3-[2-(3,4-dihydroxyphenyl)-7-hydroxy-benzofuran-4-yl]acrylic acid	ATP-citrate synthase	ACLY	P53396	Swisstarget
Hongqu (red yeast rice)	MOL007475	Ginsenoside f2	Low molecular weight phosphotyrosine protein phosphatase	ACP1	P24666	Swisstarget
Kugua (Momordica charantia)	MOL012374	momordic acid	Low molecular weight phosphotyrosine protein phosphatase	ACP1	P24666	Swisstarget
Danshen (Radix Salviae)	MOL007064	przewalskin b	Low molecular weight phosphotyrosine protein phosphatase	ACP1	P24666	Swisstarget
Danshen (Radix Salviae)	MOL006824	α-amyrin	Low molecular weight phosphotyrosine protein phosphatase	ACP1	P24666	Swisstarget
Danshen (Radix Salviae)	MOL007082	Danshenol A	Prostatic acid phosphatase	ACPP	P15309	Swisstarget
Danshen (Radix Salviae)	MOL007081	Danshenol B	Prostatic acid phosphatase	ACPP	P15309	Swisstarget
Danshen (Radix Salviae)	MOL007050	2-(4-hydroxy-3-methoxyphenyl)-5-(3-hydroxypropyl)-7-methoxy-3-benzofurancarboxaldehyde	Serine/threonine-protein kinase receptor R3	ACVRL1	P37023	Swisstarget
Beiwuweizi (Schisandrae Chinensis Fructus)	MOL008956	Angeloylgomisin O	Serine/threonine-protein kinase receptor R3	ACVRL1	P37023	Swisstarget
Huanglian (Coptidis Rhizoma)	MOL000762	Palmidin A	Serine/threonine-protein kinase receptor R3	ACVRL1	P37023	Swisstarget
Danshen (Radix Salviae)	MOL007077	sclareol	Adenosine deaminase	ADA	P00813	Swisstarget
Zhimu (Anemarrhenae Rhizoma)	MOL000483	(Z)-3-(4-hydroxy-3-methoxy-phenyl)-N-[2-(4-hydroxyphenyl)ethyl]acrylamide	ADAM10	ADAM10	O14672	Swisstarget
Beiwuweizi (Schisandrae Chinensis Fructus)	MOL008968	Gomisin-A	ADAM10	ADAM10	O14672	Swisstarget
Huanglian (Coptidis Rhizoma)	MOL008647	Moupinamide	ADAM10	ADAM10	O14672	Swisstarget
Danshen (Radix Salviae)	MOL007079	tanshinaldehyde	ADAM10	ADAM10	O14672	Swisstarget
Danshen (Radix Salviae)	MOL007154	tanshinone iia	ADAM10	ADAM10	O14672	Swisstarget
Zhimu (Anemarrhenae Rhizoma)	MOL000483	(Z)-3-(4-hydroxy-3-methoxy-phenyl)-N-[2-(4-hydroxyphenyl)ethyl]acrylamide	ADAM17	ADAM17	P78536	Swisstarget
Danshen (Radix Salviae)	MOL007050	2-(4-hydroxy-3-methoxyphenyl)-5-(3-hydroxypropyl)-7-methoxy-3-benzofurancarboxaldehyde	ADAM17	ADAM17	P78536	Swisstarget
Hongqu (red yeast rice)	MOL011455	20-Hexadecanoylingenol	ADAM17	ADAM17	P78536	Swisstarget
Danshen (Radix Salviae)	MOL007041	2-isopropyl-8-methylphenanthrene-3,4-dione	ADAM17	ADAM17	P78536	Swisstarget
Zhimu (Anemarrhenae Rhizoma)	MOL000631	coumaroyltyramine	ADAM17	ADAM17	P78536	Swisstarget
Danshen (Radix Salviae)	MOL007101	dihydrotanshinoneⅠ	ADAM17	ADAM17	P78536	Swisstarget
Beiwuweizi (Schisandrae Chinensis Fructus)	MOL008974	Gomisin G	ADAM17	ADAM17	P78536	Swisstarget
Beiwuweizi (Schisandrae Chinensis Fructus)	MOL008968	Gomisin-A	ADAM17	ADAM17	P78536	Swisstarget
Danshen (Radix Salviae)	MOL007122	Miltirone	ADAM17	ADAM17	P78536	Swisstarget
Huanglian (Coptidis Rhizoma)	MOL008647	Moupinamide	ADAM17	ADAM17	P78536	Swisstarget
Huanglian (Coptidis Rhizoma)	MOL000762	Palmidin A	ADAM17	ADAM17	P78536	Swisstarget
Danshen (Radix Salviae)	MOL007079	tanshinaldehyde	ADAM17	ADAM17	P78536	Swisstarget
Danshen (Radix Salviae)	MOL007154	tanshinone iia	ADAM17	ADAM17	P78536	Swisstarget
Danshen (Radix Salviae)	MOL007036	5,6-dihydroxy-7-isopropyl-1,1-dimethyl-2,3-dihydrophenanthren-4-one	ADAMTS5	ADAMTS5	Q9UNA0	Swisstarget
Luhui (Aloe vera)	MOL000953	CLR	ADAMTS5	ADAMTS5	Q9UNA0	Swisstarget
Danshen (Radix Salviae)	MOL007120	miltionone Ⅱ	ADAMTS5	ADAMTS5	Q9UNA0	Swisstarget
Danshen (Radix Salviae)	MOL007149	NSC 122421	ADAMTS5	ADAMTS5	Q9UNA0	Swisstarget
Danshen (Radix Salviae)	MOL002222	sugiol	ADAMTS5	ADAMTS5	Q9UNA0	Swisstarget
Danshen (Radix Salviae)	MOL007050	2-(4-hydroxy-3-methoxyphenyl)-5-(3-hydroxypropyl)-7-methoxy-3-benzofurancarboxaldehyde	Brain adenylate cyclase 1	ADCY1	Q08828	Swisstarget
Huanglian (Coptidis Rhizoma)	MOL000762	Palmidin A	Brain adenylate cyclase 1	ADCY1	Q08828	Swisstarget
Danshen (Radix Salviae)	MOL007142	salvianolic acid j	Brain adenylate cyclase 1	ADCY1	Q08828	Swisstarget
Danshen (Radix Salviae)	MOL007156	tanshinone Ⅵ	Brain adenylate cyclase 1	ADCY1	Q08828	Swisstarget
Danshen (Radix Salviae)	MOL007050	2-(4-hydroxy-3-methoxyphenyl)-5-(3-hydroxypropyl)-7-methoxy-3-benzofurancarboxaldehyde	Adenosine kinase	ADK	P55263	Swisstarget
Danshen (Radix Salviae)	MOL007156	tanshinone Ⅵ	Adenosine kinase	ADK	P55263	Swisstarget
Zhimu (Anemarrhenae Rhizoma)	MOL000483	(Z)-3-(4-hydroxy-3-methoxy-phenyl)-N-[2-(4-hydroxyphenyl)ethyl]acrylamide	Adenosine A1 receptor	ADORA1	P30542	Swisstarget
Ganjiang (Zingiberis Rhizoma)	MOL002501	[(1S)-3-[(E)-but-2-enyl]-2-methyl-4-oxo-1-cyclopent-2-enyl] (1R,3R)-3-[(E)-3-methoxy-2-methyl-3-oxoprop-1-enyl]-2,2-dimethylcyclopropane-1-carboxylate	Adenosine A1 receptor	ADORA1	P30542	Swisstarget
Danshen (Radix Salviae)	MOL001601	1,2,5,6-tetrahydrotanshinone	Adenosine A1 receptor	ADORA1	P30542	Swisstarget
Danshen (Radix Salviae)	MOL007127	1-methyl-8,9-dihydro-7H-naphtho[5,6-g]benzofuran-6,10,11-trione	Adenosine A1 receptor	ADORA1	P30542	Swisstarget
Danshen (Radix Salviae)	MOL007041	2-isopropyl-8-methylphenanthrene-3,4-dione	Adenosine A1 receptor	ADORA1	P30542	Swisstarget
Danshen (Radix Salviae)	MOL007036	5,6-dihydroxy-7-isopropyl-1,1-dimethyl-2,3-dihydrophenanthren-4-one	Adenosine A1 receptor	ADORA1	P30542	Swisstarget
Beiwuweizi (Schisandrae Chinensis Fructus)	MOL008956	Angeloylgomisin O	Adenosine A1 receptor	ADORA1	P30542	Swisstarget
Danshen (Radix Salviae)	MOL002776	Baicalin	Adenosine A1 receptor	ADORA1	P30542	Swisstarget
Danshen (Radix Salviae)	MOL007088	cryptotanshinone	Adenosine A1 receptor	ADORA1	P30542	Swisstarget
Danshen (Radix Salviae)	MOL007082	Danshenol A	Adenosine A1 receptor	ADORA1	P30542	Swisstarget
Danshen (Radix Salviae)	MOL007081	Danshenol B	Adenosine A1 receptor	ADORA1	P30542	Swisstarget
Danshen (Radix Salviae)	MOL007094	danshenspiroketallactone	Adenosine A1 receptor	ADORA1	P30542	Swisstarget
Danshen (Radix Salviae)	MOL002651	Dehydrotanshinone II A	Adenosine A1 receptor	ADORA1	P30542	Swisstarget
Beiwuweizi (Schisandrae Chinensis Fructus)	MOL005317	Deoxyharringtonine	Adenosine A1 receptor	ADORA1	P30542	Swisstarget
Danshen (Radix Salviae)	MOL007101	dihydrotanshinoneⅠ	Adenosine A1 receptor	ADORA1	P30542	Swisstarget
Zhimu (Anemarrhenae Rhizoma)	MOL000546	diosgenin	Adenosine A1 receptor	ADORA1	P30542	Swisstarget
Danshen (Radix Salviae)	MOL007105	epidanshenspiroketallactone	Adenosine A1 receptor	ADORA1	P30542	Swisstarget
Danshen (Radix Salviae)	MOL007058	formyltanshinone	Adenosine A1 receptor	ADORA1	P30542	Swisstarget
Hongqu (red yeast rice)	MOL000702	Guaijaverin	Adenosine A1 receptor	ADORA1	P30542	Swisstarget
Zhimu (Anemarrhenae Rhizoma)	MOL000422	kaempferol	Adenosine A1 receptor	ADORA1	P30542	Swisstarget
Danshen (Radix Salviae)	MOL000006	luteolin	Adenosine A1 receptor	ADORA1	P30542	Swisstarget
Danshen (Radix Salviae)	MOL007120	miltionone Ⅱ	Adenosine A1 receptor	ADORA1	P30542	Swisstarget
Huanglian (Coptidis Rhizoma)	MOL008647	Moupinamide	Adenosine A1 receptor	ADORA1	P30542	Swisstarget
Hongqu (red yeast rice)	MOL005376	Panaxadiol	Adenosine A1 receptor	ADORA1	P30542	Swisstarget
Danshen (Radix Salviae)	MOL007064	przewalskin b	Adenosine A1 receptor	ADORA1	P30542	Swisstarget
Hongqu (red yeast rice)	MOL000098	Quercetin	Adenosine A1 receptor	ADORA1	P30542	Swisstarget
Luhui (Aloe vera)	MOL000098	quercetin	Adenosine A1 receptor	ADORA1	P30542	Swisstarget
Huanglian (Coptidis Rhizoma)	MOL000098	quercetin	Adenosine A1 receptor	ADORA1	P30542	Swisstarget
Ganjiang (Zingiberis Rhizoma)	MOL002514	Sexangularetin	Adenosine A1 receptor	ADORA1	P30542	Swisstarget
Danshen (Radix Salviae)	MOL007156	tanshinone Ⅵ	Adenosine A1 receptor	ADORA1	P30542	Swisstarget
Zhimu (Anemarrhenae Rhizoma)	MOL000483	(Z)-3-(4-hydroxy-3-methoxy-phenyl)-N-[2-(4-hydroxyphenyl)ethyl]acrylamide	Adenosine A2a receptor	ADORA2A	P29274	Swisstarget
Danshen (Radix Salviae)	MOL007127	1-methyl-8,9-dihydro-7H-naphtho[5,6-g]benzofuran-6,10,11-trione	Adenosine A2a receptor	ADORA2A	P29274	Swisstarget
Danshen (Radix Salviae)	MOL007050	2-(4-hydroxy-3-methoxyphenyl)-5-(3-hydroxypropyl)-7-methoxy-3-benzofurancarboxaldehyde	Adenosine A2a receptor	ADORA2A	P29274	Swisstarget
Danshen (Radix Salviae)	MOL007041	2-isopropyl-8-methylphenanthrene-3,4-dione	Adenosine A2a receptor	ADORA2A	P29274	Swisstarget
Danshen (Radix Salviae)	MOL007036	5,6-dihydroxy-7-isopropyl-1,1-dimethyl-2,3-dihydrophenanthren-4-one	Adenosine A2a receptor	ADORA2A	P29274	Swisstarget
Danshen (Radix Salviae)	MOL007051	6-o-syringyl-8-o-acetyl shanzhiside methyl ester	Adenosine A2a receptor	ADORA2A	P29274	Swisstarget
Luhui (Aloe vera)	MOL005051	Aloeresin C	Adenosine A2a receptor	ADORA2A	P29274	Swisstarget
Beiwuweizi (Schisandrae Chinensis Fructus)	MOL008956	Angeloylgomisin O	Adenosine A2a receptor	ADORA2A	P29274	Swisstarget
Huanglian (Coptidis Rhizoma)	MOL002904	Berlambine	Adenosine A2a receptor	ADORA2A	P29274	Swisstarget
Danshen (Radix Salviae)	MOL007088	cryptotanshinone	Adenosine A2a receptor	ADORA2A	P29274	Swisstarget
Danshen (Radix Salviae)	MOL007082	Danshenol A	Adenosine A2a receptor	ADORA2A	P29274	Swisstarget
Danshen (Radix Salviae)	MOL007081	Danshenol B	Adenosine A2a receptor	ADORA2A	P29274	Swisstarget
Danshen (Radix Salviae)	MOL007094	danshenspiroketallactone	Adenosine A2a receptor	ADORA2A	P29274	Swisstarget
Danshen (Radix Salviae)	MOL002651	Dehydrotanshinone II A	Adenosine A2a receptor	ADORA2A	P29274	Swisstarget
Beiwuweizi (Schisandrae Chinensis Fructus)	MOL005317	Deoxyharringtonine	Adenosine A2a receptor	ADORA2A	P29274	Swisstarget
Danshen (Radix Salviae)	MOL007101	dihydrotanshinoneⅠ	Adenosine A2a receptor	ADORA2A	P29274	Swisstarget
Zhimu (Anemarrhenae Rhizoma)	MOL000546	diosgenin	Adenosine A2a receptor	ADORA2A	P29274	Swisstarget
Huanglian (Coptidis Rhizoma)	MOL002897	epiberberine	Adenosine A2a receptor	ADORA2A	P29274	Swisstarget
Danshen (Radix Salviae)	MOL007105	epidanshenspiroketallactone	Adenosine A2a receptor	ADORA2A	P29274	Swisstarget
Danshen (Radix Salviae)	MOL007058	formyltanshinone	Adenosine A2a receptor	ADORA2A	P29274	Swisstarget
Beiwuweizi (Schisandrae Chinensis Fructus)	MOL008974	Gomisin G	Adenosine A2a receptor	ADORA2A	P29274	Swisstarget
Beiwuweizi (Schisandrae Chinensis Fructus)	MOL008968	Gomisin-A	Adenosine A2a receptor	ADORA2A	P29274	Swisstarget
[truncated: 6,478 more rows]
